# Supplementary material for: Measurement of time-varying kinematics of a dolphin in burst accelerating swimming
Source: PubMed Central journal article supplement (PMC6353170; doi:10.1371/journal.pone.0210860), 2019-01-30

**(A)  $Re = 1 \times 10^6$**

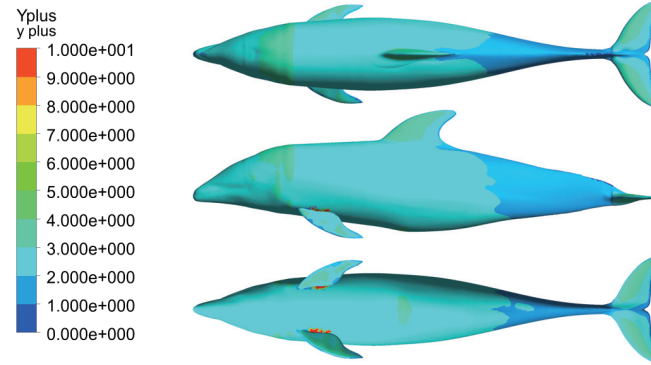

**(B)  $Re = 1 \times 10^7$**

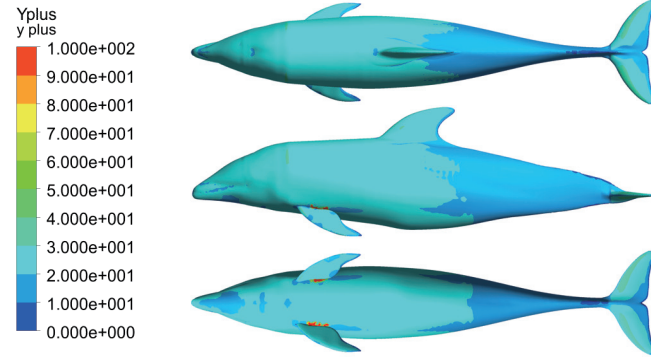

**(C)  $Re = 2 \times 10^7$**

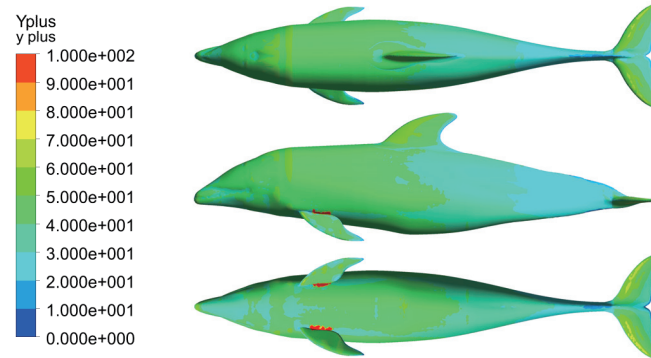

**(D)  $Re = 3 \times 10^7$**

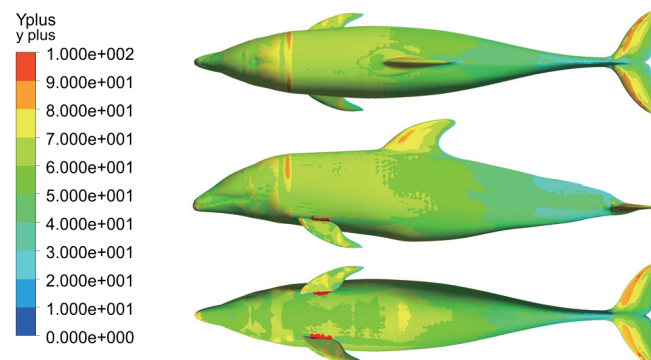

**(E)  $Re = 4 \times 10^7$**

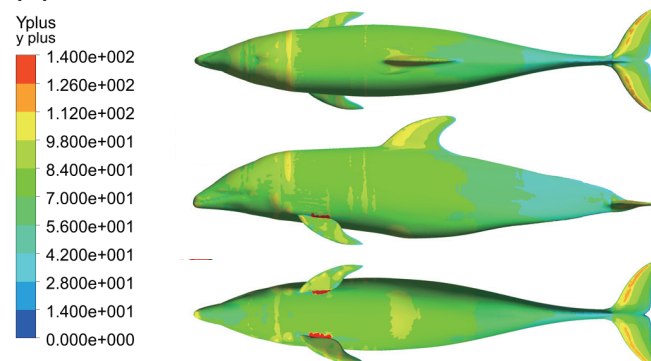

Supplement: pone.0210860.s006.pdf [file pone.0210860.s006.pdf]
