# Supplementary material for: Measurement of time-varying kinematics of a dolphin in burst accelerating swimming
Source: PLoS One. 2019 Jan 30;14(1):e0210860. doi: 10.1371/journal.pone.0210860 (PMC6353170; doi:10.1371/journal.pone.0210860)
Supplement: S1 Dataset — (XLSX) [file pone.0210860.s007.xlsx]

## Sheet: 3-D_trajectories
Frame number in the original AVI movies	Time, t (s)	Beak (X) (m)	Beak (Y) (m)	Beak (Z) (m)	Right lateral (X) (m)	Right lateral (Y) (m)	Right lateral (Z) (m)	Left lateral (X) (m)	Left lateral (Y) (m)	Left lateral (Z) (m)	Dorsal (X) (m)	Dorsal (Y) (m)	Dorsal (Z) (m)	Fluke base (X) (m)	Fluke base (Y) (m)	Fluke base (Z) (m)	Fluke, median notch (X) (m)	Fluke, median notch (Y) (m)	Fluke, median notch (Z) (m)	Fluke, left wingtip (X) (m)	Fluke, left wingtip (Y) (m)	Fluke, left wingtip (Z) (m)	Fluke, right wingtip (X) (m)	Fluke, right wingtip (Y) (m)	Fluke, right wingtip (Z) (m)
1	-1.624
2	-1.622
3	-1.62
4	-1.618
5	-1.616
6	-1.614
7	-1.612
8	-1.61
9	-1.608
10	-1.606
11	-1.604
12	-1.602
13	-1.6
14	-1.598
15	-1.596
16	-1.594
17	-1.592
18	-1.59
19	-1.588
20	-1.586
21	-1.584
22	-1.582
23	-1.58
24	-1.578
25	-1.576
26	-1.574
27	-1.572
28	-1.57
29	-1.568
30	-1.566
31	-1.564
32	-1.562
33	-1.56
34	-1.558
35	-1.556
36	-1.554
37	-1.552
38	-1.55
39	-1.548
40	-1.546
41	-1.544
42	-1.542
43	-1.54
44	-1.538
45	-1.536
46	-1.534
47	-1.532
48	-1.53
49	-1.528
50	-1.526
51	-1.524
52	-1.522
53	-1.52
54	-1.518
55	-1.516
56	-1.514
57	-1.512
58	-1.51
59	-1.508
60	-1.506
61	-1.504
62	-1.502
63	-1.5
64	-1.498
65	-1.496
66	-1.494
67	-1.492
68	-1.49
69	-1.488
70	-1.486
71	-1.484
72	-1.482
73	-1.48
74	-1.478
75	-1.476
76	-1.474
77	-1.472
78	-1.47
79	-1.468
80	-1.466
81	-1.464
82	-1.462
83	-1.46
84	-1.458
85	-1.456
86	-1.454
87	-1.452
88	-1.45
89	-1.448
90	-1.446
91	-1.444
92	-1.442
93	-1.44
94	-1.438
95	-1.436
96	-1.434
97	-1.432
98	-1.43
99	-1.428
100	-1.426
101	-1.424
102	-1.422
103	-1.42
104	-1.418
105	-1.416
106	-1.414
107	-1.412
108	-1.41
109	-1.408
110	-1.406
111	-1.404
112	-1.402
113	-1.4
114	-1.398
115	-1.396
116	-1.394
117	-1.392
118	-1.39
119	-1.388
120	-1.386
121	-1.384
122	-1.382
123	-1.38
124	-1.378
125	-1.376
126	-1.374
127	-1.372
128	-1.37
129	-1.368
130	-1.366
131	-1.364
132	-1.362
133	-1.36
134	-1.358
135	-1.356
136	-1.354
137	-1.352
138	-1.35
139	-1.348
140	-1.346
141	-1.344
142	-1.342
143	-1.34
144	-1.338
145	-1.336
146	-1.334
147	-1.332
148	-1.33
149	-1.328
150	-1.326
151	-1.324
152	-1.322
153	-1.32
154	-1.318
155	-1.316
156	-1.314
157	-1.312
158	-1.31
159	-1.308
160	-1.306
161	-1.304
162	-1.302
163	-1.3
164	-1.298
165	-1.296
166	-1.294
167	-1.292
168	-1.29
169	-1.288
170	-1.286
171	-1.284
172	-1.282
173	-1.28
174	-1.278
175	-1.276
176	-1.274
177	-1.272
178	-1.27
179	-1.268
180	-1.266
181	-1.264
182	-1.262
183	-1.26
184	-1.258
185	-1.256
186	-1.254
187	-1.252
188	-1.25
189	-1.248
190	-1.246
191	-1.244
192	-1.242
193	-1.24
194	-1.238
195	-1.236
196	-1.234
197	-1.232
198	-1.23
199	-1.228
200	-1.226
201	-1.224
202	-1.222
203	-1.22
204	-1.218
205	-1.216
206	-1.214
207	-1.212
208	-1.21
209	-1.208
210	-1.206
211	-1.204
212	-1.202
213	-1.2
214	-1.198
215	-1.196
216	-1.194
217	-1.192
218	-1.19
219	-1.188
220	-1.186
221	-1.184
222	-1.182
223	-1.18
224	-1.178
225	-1.176
226	-1.174
227	-1.172
228	-1.17
229	-1.168
230	-1.166
231	-1.164
232	-1.162
233	-1.16
234	-1.158
235	-1.156
236	-1.154
237	-1.152
238	-1.15
239	-1.148
240	-1.146
241	-1.144
242	-1.142
243	-1.14
244	-1.138
245	-1.136
246	-1.134
247	-1.132
248	-1.13
249	-1.128
250	-1.126
251	-1.124
252	-1.122
253	-1.12
254	-1.118
255	-1.116
256	-1.114
257	-1.112
258	-1.11
259	-1.108
260	-1.106
261	-1.104
262	-1.102
263	-1.1
264	-1.098
265	-1.096
266	-1.094
267	-1.092
268	-1.09
269	-1.088
270	-1.086
271	-1.084
272	-1.082
273	-1.08
274	-1.078
275	-1.076
276	-1.074
277	-1.072
278	-1.07
279	-1.068
280	-1.066
281	-1.064
282	-1.062
283	-1.06
284	-1.058
285	-1.056
286	-1.054
287	-1.052
288	-1.05
289	-1.048
290	-1.046
291	-1.044
292	-1.042
293	-1.04
294	-1.038
295	-1.036
296	-1.034
297	-1.032
298	-1.03
299	-1.028
300	-1.026
301	-1.024
302	-1.022
303	-1.02
304	-1.018
305	-1.016
306	-1.014
307	-1.012
308	-1.01
309	-1.008
310	-1.006
311	-1.004
312	-1.002
313	-1
314	-0.998
315	-0.996
316	-0.994
317	-0.992
318	-0.99
319	-0.988
320	-0.986
321	-0.984
322	-0.982
323	-0.98
324	-0.978
325	-0.976
326	-0.974
327	-0.972
328	-0.97
329	-0.968
330	-0.966
331	-0.964
332	-0.962
333	-0.96
334	-0.958
335	-0.956
336	-0.954
337	-0.952
338	-0.95
339	-0.948
340	-0.946
341	-0.944
342	-0.942
343	-0.94
344	-0.938
345	-0.936
346	-0.934
347	-0.932
348	-0.93
349	-0.928
350	-0.926
351	-0.924
352	-0.922
353	-0.92
354	-0.918
355	-0.916
356	-0.914
357	-0.912
358	-0.91
359	-0.908
360	-0.906
361	-0.904
362	-0.902
363	-0.9
364	-0.898
365	-0.896
366	-0.894
367	-0.892
368	-0.89
369	-0.888
370	-0.886
371	-0.884
372	-0.882
373	-0.88
374	-0.878
375	-0.876
376	-0.874
377	-0.872
378	-0.87
379	-0.868
380	-0.866
381	-0.864
382	-0.862
383	-0.86
384	-0.858
385	-0.856
386	-0.854
387	-0.852
388	-0.85
389	-0.848
390	-0.846
391	-0.844
392	-0.842
393	-0.84
394	-0.838
395	-0.836
396	-0.834
397	-0.832
398	-0.83
399	-0.828
400	-0.826
401	-0.824
402	-0.822
403	-0.82
404	-0.818
405	-0.816
406	-0.814
407	-0.812
408	-0.81
409	-0.808
410	-0.806
411	-0.804
412	-0.802
413	-0.8
414	-0.798
415	-0.796
416	-0.794
417	-0.792
418	-0.79
419	-0.788
420	-0.786
421	-0.784
422	-0.782
423	-0.78
424	-0.778
425	-0.776
426	-0.774
427	-0.772
428	-0.77
429	-0.768
430	-0.766
431	-0.764
432	-0.762
433	-0.76
434	-0.758
435	-0.756
436	-0.754
437	-0.752
438	-0.75
439	-0.748
440	-0.746
441	-0.744
442	-0.742
443	-0.74
444	-0.738
445	-0.736
446	-0.734
447	-0.732
448	-0.73
449	-0.728
450	-0.726
451	-0.724
452	-0.722
453	-0.72
454	-0.718
455	-0.716
456	-0.714
457	-0.712
458	-0.71
459	-0.708
460	-0.706
461	-0.704
462	-0.702
463	-0.7
464	-0.698
465	-0.696
466	-0.694
467	-0.692
468	-0.69
469	-0.688
470	-0.686
471	-0.684
472	-0.682
473	-0.68
474	-0.678
475	-0.676
476	-0.674
477	-0.672
478	-0.67
479	-0.668
480	-0.666
481	-0.664
482	-0.662
483	-0.66
484	-0.658
485	-0.656
486	-0.654
487	-0.652
488	-0.65
489	-0.648
490	-0.646
491	-0.644
492	-0.642
493	-0.64
494	-0.638
495	-0.636
496	-0.634
497	-0.632
498	-0.63
499	-0.628
500	-0.626
501	-0.624
502	-0.622
503	-0.62
504	-0.618
505	-0.616
506	-0.614
507	-0.612
508	-0.61
509	-0.608
510	-0.606
511	-0.604
512	-0.602
513	-0.6
514	-0.598
515	-0.596
516	-0.594
517	-0.592
518	-0.59
519	-0.588
520	-0.586
521	-0.584
522	-0.582
523	-0.58
524	-0.578
525	-0.576
526	-0.574
527	-0.572
528	-0.57
529	-0.568
530	-0.566
531	-0.564
532	-0.562
533	-0.56
534	-0.558
535	-0.556
536	-0.554
537	-0.552
538	-0.55
539	-0.548
540	-0.546
541	-0.544
542	-0.542
543	-0.54
544	-0.538
545	-0.536
546	-0.534
547	-0.532
548	-0.53
549	-0.528
550	-0.526
551	-0.524
552	-0.522
553	-0.52
554	-0.518
555	-0.516
556	-0.514
557	-0.512
558	-0.51
559	-0.508
560	-0.506
561	-0.504
562	-0.502
563	-0.5
564	-0.498
565	-0.496
566	-0.494
567	-0.492
568	-0.49
569	-0.488
570	-0.486
571	-0.484
572	-0.482
573	-0.48
574	-0.478
575	-0.476
576	-0.474
577	-0.472
578	-0.47
579	-0.468
580	-0.466
581	-0.464
582	-0.462
583	-0.46
584	-0.458
585	-0.456
586	-0.454
587	-0.452
588	-0.45
589	-0.448
590	-0.446
591	-0.444
592	-0.442
593	-0.44
594	-0.438
595	-0.436
596	-0.434
597	-0.432
598	-0.43
599	-0.428
600	-0.426
601	-0.424
602	-0.422
603	-0.42
604	-0.418
605	-0.416
606	-0.414
607	-0.412
608	-0.41
609	-0.408
610	-0.406
611	-0.404
612	-0.402
613	-0.4
614	-0.398
615	-0.396
616	-0.394
617	-0.392
618	-0.39
619	-0.388
620	-0.386
621	-0.384
622	-0.382
623	-0.38
624	-0.378
625	-0.376
626	-0.374
627	-0.372
628	-0.37
629	-0.368
630	-0.366
631	-0.364
632	-0.362
633	-0.36
634	-0.358
635	-0.356
636	-0.354
637	-0.352
638	-0.35
639	-0.348
640	-0.346
641	-0.344
642	-0.342
643	-0.34
644	-0.338
645	-0.336
646	-0.334
647	-0.332
648	-0.33
649	-0.328
650	-0.326
651	-0.324
652	-0.322
653	-0.32
654	-0.318
655	-0.316
656	-0.314
657	-0.312
658	-0.31
659	-0.308
660	-0.306
661	-0.304
662	-0.302
663	-0.3	17.1774	13.8247	-0.583357
664	-0.298	17.1694	13.816	-0.587266
665	-0.296	17.1884	13.8206	-0.603543
666	-0.294	17.1816	13.8131	-0.61108
667	-0.292	17.1779	13.809	-0.612942
668	-0.29	17.2009	13.8181	-0.618438
669	-0.288	17.1943	13.8105	-0.633111
670	-0.286	17.1832	13.7986	-0.63847
671	-0.284	17.2079	13.8093	-0.641476
672	-0.282	17.2031	13.804	-0.648234
673	-0.28	17.1872	13.7869	-0.660358
674	-0.278	17.1888	13.7884	-0.659268
675	-0.276	17.2154	13.8011	-0.674984
676	-0.274	17.205	13.7897	-0.682569
677	-0.272	17.1972	13.7811	-0.690536
678	-0.27	17.1936	13.7771	-0.694079
679	-0.268	17.2211	13.7909	-0.700972
680	-0.266	17.2027	13.7712	-0.704907
681	-0.264	17.2011	13.769	-0.716588
682	-0.262	17.2055	13.7734	-0.721533
683	-0.26	17.2297	13.7838	-0.723425
684	-0.258	17.2182	13.771	-0.743213
685	-0.256	17.2122	13.7643	-0.74752
686	-0.254	17.2362	13.7743	-0.757256
687	-0.252	17.231	13.7685	-0.764468
688	-0.25	17.2211	13.7578	-0.771535
689	-0.248	17.2206	13.7571	-0.774737
690	-0.246	17.2444	13.7665	-0.787316
691	-0.244	17.2441	13.766	-0.790077
692	-0.242	17.2387	13.7601	-0.798083
693	-0.24	17.2583	13.7653	-0.80329
694	-0.238	17.2505	13.7568	-0.816189
695	-0.236	17.2505	13.7564	-0.823071
696	-0.234	17.246	13.7512	-0.830813
697	-0.232	17.2642	13.755	-0.844421
698	-0.23	17.2601	13.7504	-0.847414
699	-0.228	17.258	13.7478	-0.856583
700	-0.226	17.272	13.7471	-0.864846
701	-0.224	17.27	13.7447	-0.869447
702	-0.222	17.2708	13.7452	-0.879475
703	-0.22	17.2926	13.7529	-0.881222
704	-0.218	17.2913	13.7509	-0.898053
705	-0.216	17.2776	13.7362	-0.902962
706	-0.214	17.274	13.7321	-0.909041
707	-0.212	17.2942	13.738	-0.912829
708	-0.21	17.2865	13.7295	-0.927778
709	-0.208	17.2854	13.7281	-0.929853
710	-0.206	17.2804	13.7225	-0.934336
711	-0.204	17.2654	13.7064	-0.946774
712	-0.202	17.2875	13.7143	-0.950516
713	-0.2	17.3147	13.7271	-0.968033
714	-0.198	17.3041	13.7157	-0.972873
715	-0.196	17.3014	13.7125	-0.980556
716	-0.194	17.321	13.7175	-0.990408
717	-0.192	17.3169	13.7128	-0.996857
718	-0.19	17.3125	13.7078	-1.01019
719	-0.188	17.308	13.7028	-1.01238
720	-0.186	17.3241	13.7043	-1.0168
721	-0.184	17.3165	13.6959	-1.02937
722	-0.182	17.3056	13.6842	-1.03372
723	-0.18	17.3233	13.6872	-1.04179
724	-0.178	17.3782	13.7445	-1.04761
725	-0.176	17.4029	13.7547	-1.06318
726	-0.174	17.3886	13.7396	-1.06355
727	-0.172	17.3756	13.7252	-1.0829
728	-0.17	17.3694	13.7183	-1.08859
729	-0.168	17.394	13.7287	-1.0947
730	-0.166	17.3845	13.7184	-1.10005
731	-0.164	17.4072	13.7266	-1.10859
732	-0.162	17.4024	13.7214	-1.11068
733	-0.16	17.3908	13.7089	-1.11987
734	-0.158	17.3869	13.7042	-1.13566
735	-0.156	17.3857	13.7025	-1.14162
736	-0.154	17.3963	13.6984	-1.14625
737	-0.152	17.432	13.7199	-1.1583
738	-0.15	17.424	13.7112	-1.16327
739	-0.148	17.4449	13.7173	-1.17338
740	-0.146	17.4382	13.7099	-1.18592
741	-0.144	17.4318	13.703	-1.19038
742	-0.142	17.4482	13.7046	-1.19375
743	-0.14	17.4081	13.6777	-1.20115
744	-0.138	17.4013	13.6684	-1.21143
745	-0.136	17.4238	13.68	-1.22325
746	-0.134	17.4116	13.6622	-1.22565
747	-0.132	17.4333	13.6746	-1.2371
748	-0.13	17.4238	13.6569	-1.24065
749	-0.128	17.4287	13.6566	-1.24884
750	-0.126	17.43	13.656	-1.25802
751	-0.124	17.4211	13.6394	-1.26004
752	-0.122	17.394	13.6015	-1.26262
753	-0.12	17.4058	13.608	-1.26991
754	-0.118	17.4294	13.6214	-1.27934
755	-0.116	17.4612	13.6382	-1.2805
756	-0.114	17.4622	13.6387	-1.29138
757	-0.112	17.4948	13.6566	-1.30314
758	-0.11	17.4354	13.6246	-1.32023
759	-0.108	17.4862	13.6472	-1.31313
760	-0.106	17.4816	13.6267	-1.32784
761	-0.104	17.5037	13.6493	-1.33218
762	-0.102	17.5488	13.6493	-1.35795
763	-0.1	17.5018	13.6007	-1.3605
764	-0.098	17.481	13.5785	-1.37441
765	-0.096	17.4658	13.5476	-1.37857
766	-0.094	17.4681	13.5491	-1.3938
767	-0.092	17.4991	13.5654	-1.40594
768	-0.09	17.5014	13.5669	-1.42121
769	-0.088	17.5313	13.5822	-1.42839
770	-0.086	17.5077	13.5578	-1.43218
771	-0.084	17.509	13.5588	-1.43721
772	-0.082	17.5388	13.5741	-1.44441
773	-0.08	17.5385	13.5736	-1.44964
774	-0.078	17.5409	13.5752	-1.46497
775	-0.076	17.4966	13.529	-1.47727
776	-0.074	17.5265	13.5446	-1.4793
777	-0.072	17.5042	13.5213	-1.48805
778	-0.07	17.5365	13.5384	-1.50543
779	-0.068	17.5364	13.538	-1.51066
780	-0.066	17.4895	13.4898	-1.51275
781	-0.064	17.5207	13.5064	-1.51988
782	-0.062	17.5205	13.5059	-1.52511
783	-0.06	17.5228	13.5075	-1.54045
784	-0.058	17.5527	13.5227	-1.5478
785	-0.056	17.5305	13.4998	-1.55125
786	-0.054	17.5303	13.4993	-1.55647
787	-0.052	17.5628	13.5165	-1.57401
788	-0.05	17.5038	13.4859	-1.57996
789	-0.048	17.5636	13.5166	-1.58957
790	-0.046	17.5962	13.5339	-1.6072	17.1127	13.7584	-0.519105
791	-0.044	17.6278	13.5506	-1.61454	17.114	13.7477	-0.524327
792	-0.042	17.5672	13.5188	-1.61531	17.1044	13.7314	-0.535691
793	-0.04	17.5695	13.5204	-1.63074	17.1273	13.7438	-0.536628
794	-0.038	17.6009	13.5367	-1.64337	17.1311	13.7345	-0.547111
795	-0.036	17.5559	13.4901	-1.65525	17.1196	13.7169	-0.556545
796	-0.034	17.5559	13.4901	-1.65525	17.0967	13.682	-0.563093
797	-0.032	17.5872	13.5063	-1.66791	17.1017	13.6753	-0.572045
798	-0.03	17.5635	13.482	-1.67135	17.1096	13.6786	-0.574446
799	-0.028	17.5634	13.4816	-1.6766	17.1157	13.6725	-0.584141
800	-0.026	17.5971	13.4997	-1.69952	17.1324	13.68	-0.588659
801	-0.024	17.597	13.4993	-1.70478	17.1169	13.6587	-0.595253
802	-0.022	17.597	13.4993	-1.70478	17.1373	13.6698	-0.602833
803	-0.02	17.6272	13.5145	-1.71242	17.1299	13.6546	-0.609072
804	-0.018	17.6269	13.514	-1.71767	17.1293	13.6406	-0.617746
805	-0.016	17.6294	13.5157	-1.73321	17.153	13.6556	-0.624056
806	-0.014	17.612	13.4827	-1.73705	17.1506	13.6405	-0.633354
807	-0.012	17.612	13.4827	-1.73705	17.1765	13.6567	-0.637258
808	-0.01	17.588	13.4582	-1.74038	17.1586	13.6341	-0.646027
809	-0.008	17.542	13.411	-1.74689	17.1643	13.6274	-0.651782
810	-0.006	17.5717	13.4258	-1.75454	17.1675	13.6277	-0.658426
811	-0.004	17.5743	13.4275	-1.77004	17.1681	13.6163	-0.664359
812	-0.002	17.5743	13.4275	-1.77004	17.1706	13.6078	-0.673049
813	0	17.5804	13.4185	-1.77577	17.1551	13.5868	-0.678976
814	0.002	17.5329	13.3703	-1.77704	17.1789	13.5984	-0.685544
815	0.004	17.5324	13.3696	-1.78224	17.186	13.5913	-0.692327
816	0.006	17.5624	13.3849	-1.78472	17.1703	13.5719	-0.700036
817	0.008	17.54	13.3617	-1.79308	17.2025	13.591	-0.704841							16.8633	14.3584	-0.465864							16.6338	14.4734	-0.434757
818	0.01	17.5394	13.3609	-1.79827	17.1835	13.5668	-0.713967							16.8987	14.3744	-0.471093							16.7033	14.5141	-0.448816
819	0.012	17.5958	13.4019	-1.81833	17.212	13.5844	-0.719863							16.9045	14.3731	-0.478402							16.6679	14.4814	-0.448594
820	0.014	17.5952	13.4011	-1.82353	17.2154	13.575	-0.725553							16.899	14.3587	-0.485074							16.6746	14.4617	-0.457197
821	0.016	17.598	13.403	-1.8391	17.2137	13.5612	-0.734353							16.8984	14.3447	-0.494499							16.6857	14.4584	-0.456475
822	0.018	17.6092	13.399	-1.84343	17.2296	13.571	-0.739965							16.8927	14.3226	-0.50727							16.7058	14.4615	-0.46868
823	0.02	17.6027	13.392	-1.85246	17.2278	13.5559	-0.745817							16.8966	14.3136	-0.512311							16.7352	14.4794	-0.476322
824	0.022	17.5824	13.3711	-1.85828	17.2563	13.5737	-0.750802							16.9221	14.3263	-0.520961							16.7175	14.4587	-0.480936
825	0.024	17.5739	13.3619	-1.86871	17.2449	13.5562	-0.760174							16.8699	14.2496	-0.527488							16.715	14.4478	-0.490194
826	0.026	17.6005	13.3735	-1.87515	17.2482	13.5468	-0.764358							16.9055	14.2658	-0.5329							16.7306	14.4464	-0.498123
827	0.028	17.5881	13.3605	-1.8818	17.2432	13.5364	-0.771873							16.8962	14.2447	-0.542258							16.7575	14.4671	-0.508763
828	0.03	17.5903	13.3621	-1.89285	17.2591	13.5408	-0.78044							16.8805	14.2243	-0.548593							16.7728	14.4597	-0.519316
829	0.032	17.5992	13.3556	-1.902	17.2622	13.5312	-0.782127							16.8992	14.2274	-0.547972							16.7649	14.457	-0.519799
830	0.034	17.5904	13.3462	-1.91078	17.2497	13.5131	-0.792572							16.9105	14.2269	-0.55727							16.783	14.4551	-0.525757
831	0.036	17.584	13.339	-1.92372	17.2742	13.526	-0.801585				17.3389	13.4803	-0.677949	16.942	14.2483	-0.561016							16.8133	14.4665	-0.53536
832	0.038	17.6164	13.3563	-1.93086	17.2714	13.5098	-0.805955				17.3981	13.5107	-0.699737	16.9263	14.2254	-0.57353							16.7738	14.4221	-0.541888
833	0.04	17.6131	13.3379	-1.93424	17.2613	13.4949	-0.816265				17.3981	13.5107	-0.699737	16.9273	14.2188	-0.574542							16.7503	14.3951	-0.542608
834	0.042	17.5924	13.3171	-1.93605	17.288	13.5107	-0.818001				17.4057	13.5032	-0.710149	16.9523	14.2408	-0.585029							16.7784	14.411	-0.551594
835	0.044	17.5935	13.3176	-1.94645	17.2827	13.4938	-0.82761				17.4281	13.5261	-0.715647	16.9599	14.2287	-0.581994							16.8588	14.4452	-0.569564
836	0.046	17.5774	13.2859	-1.9551	17.2732	13.4783	-0.836487				17.4136	13.4961	-0.715438	16.9323	14.2083	-0.591276							16.8271	14.4153	-0.571467
837	0.048	17.5562	13.2643	-1.9604	17.2973	13.4926	-0.839238				17.4127	13.4948	-0.730818	16.9503	14.2073	-0.595724							16.8156	14.3926	-0.584913
838	0.05	17.5269	13.2345	-1.96257	17.2807	13.4706	-0.849457				17.4806	13.519	-0.747878	16.9434	14.1893	-0.595015							16.8359	14.4001	-0.590962
839	0.052	17.5597	13.252	-1.97419	17.307	13.4862	-0.851704				17.4818	13.5199	-0.752697	16.9572	14.2019	-0.596157							16.8465	14.3957	-0.595726
840	0.054	17.6156	13.2778	-1.98513	17.3037	13.4729	-0.862322				17.4885	13.5119	-0.753196	16.9796	14.2007	-0.601492							16.9137	14.4306	-0.612343
841	0.056	17.6524	13.3007	-1.98745	17.2999	13.4579	-0.871271				17.472	13.48	-0.758403	16.9964	14.2061	-0.603134							16.8735	14.4011	-0.612541
842	0.058	17.6468	13.2901	-1.99811	17.3223	13.4711	-0.874569				17.4729	13.4805	-0.768357	16.9917	14.1959	-0.606518							16.8353	14.3638	-0.616706
843	0.06	17.6262	13.2724	-2.00549	17.3052	13.4485	-0.883202				17.4513	13.458	-0.772719	16.99	14.1836	-0.60869							16.8434	14.3605	-0.625966
844	0.062	17.6379	13.2688	-2.01367	17.3053	13.4378	-0.888771				17.4577	13.4495	-0.778348	16.97	14.1586	-0.613214							16.8082	14.3078	-0.63143
845	0.064	17.6646	13.2801	-2.02491	17.3126	13.4418	-0.897183				17.4664	13.4428	-0.793613	17.0278	14.2172	-0.613073							16.8268	14.3094	-0.640766
846	0.066	17.5532	13.2134	-2.0153	17.3165	13.434	-0.901559				17.4953	13.4572	-0.804878	16.9946	14.1652	-0.612926							16.8033	14.2923	-0.639737
847	0.068	17.5546	13.2081	-2.02822	17.329	13.4387	-0.910303				17.4749	13.4357	-0.814027	17.021	14.171	-0.612985							16.7923	14.2738	-0.64882
848	0.07	17.6033	13.2464	-2.06088	17.3311	13.4302	-0.920691				17.5044	13.451	-0.815044	17.0243	14.1615	-0.614417							16.8167	14.2885	-0.649755
849	0.072	17.5892	13.2107	-2.06082	17.3355	13.4238	-0.9266				17.5056	13.4518	-0.819879	16.9801	14.1107	-0.605023							16.8609	14.3161	-0.655585
850	0.074	17.5912	13.1996	-2.0661	17.3379	13.4224	-0.932546				17.4659	13.3962	-0.829582	17	14.1246	-0.611798							16.8881	14.3305	-0.654577
851	0.076	17.6041	13.2038	-2.07864	17.3337	13.408	-0.942968				17.4977	13.4132	-0.840289	17.0157	14.1264	-0.614975							16.919	14.3368	-0.660432
852	0.078	17.6246	13.2117	-2.0917	17.3472	13.4132	-0.949687				17.5271	13.428	-0.846492	17.0419	14.1294	-0.614071							16.9245	14.3208	-0.664507
853	0.08	17.5925	13.1781	-2.0962	17.3522	13.4088	-0.95753				17.5038	13.4042	-0.851063	17.0524	14.1282	-0.609971							16.9549	14.3422	-0.664456
854	0.082	17.5718	13.1538	-2.08413	17.355	13.4077	-0.964992				17.5355	13.4208	-0.866981	17.0981	14.1522	-0.608731							16.9515	14.3351	-0.664546
855	0.084	17.5958	13.1566	-2.09768	17.3494	13.393	-0.971653				17.5125	13.3974	-0.866385	17.1148	14.1498	-0.606713							16.8954	14.2729	-0.657238
856	0.086	17.59	13.143	-2.10381	17.3566	13.3961	-0.976185				17.52	13.3897	-0.876869	17.0678	14.0933	-0.605641							16.8719	14.262	-0.662273
857	0.088	17.5764	13.1273	-2.1097	17.3549	13.3862	-0.985951				17.5275	13.382	-0.887358	17.0783	14.0921	-0.601539							16.8738	14.2548	-0.659448
858	0.09	17.5921	13.1286	-2.11296	17.3691	13.392	-0.996823				17.5284	13.3825	-0.897355	17.0713	14.0791	-0.605327							16.8309	14.2069	-0.659919
859	0.092	17.5965	13.1197	-2.12299	17.3534	13.3722	-1.0039				17.5051	13.3587	-0.901849	17.111	14.0991	-0.6055							16.8397	14.1949	-0.662683
860	0.094	17.5973	13.1083	-2.13227	17.3501	13.3597	-1.01275				17.5128	13.3515	-0.907196	17.0877	14.0716	-0.601475							16.8095	14.1643	-0.661168
861	0.096	17.6053	13.1042	-2.13966	17.3659	13.3676	-1.0195				17.5435	13.3674	-0.913209	17.1182	14.0817	-0.601468							16.9027	14.2059	-0.667179
862	0.098	17.5998	13.088	-2.14522	17.3836	13.3768	-1.02416				17.5212	13.3441	-0.927678	17.1189	14.0566	-0.60316							16.8721	14.178	-0.659375
863	0.1	17.5957	13.0746	-2.15244	17.3676	13.3579	-1.03567				17.5223	13.345	-0.932537	17.0925	14.0282	-0.595002							16.8897	14.1759	-0.665354
864	0.102	17.6088	13.0681	-2.15873	17.38	13.3633	-1.04028				17.5286	13.3364	-0.938173	17.089	14.0118	-0.59413							16.8813	14.1602	-0.662312
865	0.104	17.6158	13.06	-2.16352	17.3712	13.3463	-1.05219				17.5592	13.3519	-0.949391	17.1712	14.06	-0.588865							16.8853	14.1523	-0.663731
866	0.106	17.5931	13.0373	-2.16688	17.388	13.3551	-1.05608				17.5381	13.3299	-0.96355	17.2089	14.0698	-0.589388							16.8813	14.1326	-0.655252
867	0.108	17.5972	13.0285	-2.17484	17.3781	13.3425	-1.06001				17.539	13.3303	-0.973566	17.1855	14.0521	-0.590784							16.887	14.1234	-0.655933
868	0.11	17.6155	13.029	-2.1851	17.3848	13.3416	-1.07372				17.5454	13.3217	-0.979205	17.197	14.0441	-0.593888							16.9055	14.1222	-0.654508
869	0.112	17.5919	13.0052	-2.19178	17.4013	13.3512	-1.0801				17.5234	13.2993	-0.983312	17.2285	14.0525	-0.586949							16.9198	14.1224	-0.65511
870	0.114	17.5619	12.9609	-2.19286	17.391	13.333	-1.09257				17.5013	13.2765	-0.992539	17.1675	13.9901	-0.573447							16.939	14.1129	-0.64631
871	0.116	17.6194	13.0017	-2.21281	17.4075	13.3429	-1.09817				17.5022	13.2769	-1.00254	17.2129	14.0206	-0.580966							16.9448	14.1069	-0.643626
872	0.118	17.6295	12.9965	-2.22182	17.3995	13.3273	-1.1102				17.5623	13.3077	-1.01001	17.2219	14.0048	-0.578249							16.9738	14.1079	-0.636568
873	0.12	17.6375	12.9889	-2.22566	17.4021	13.3285	-1.11592				17.5391	13.2841	-1.01434	17.2074	13.9969	-0.575328							16.9744	14.0965	-0.635282
874	0.122	17.6438	12.9806	-2.2334	17.3963	13.3143	-1.12636				17.54	13.2845	-1.02437	17.1971	13.9705	-0.575794							16.973	14.0857	-0.634492
875	0.124	17.651	12.9727	-2.23908	17.4058	13.3188	-1.13737				17.5475	13.2771	-1.02974	17.1616	13.902	-0.571786							16.9717	14.0688	-0.631815
876	0.126	17.6601	12.9665	-2.24646	17.4034	13.3063	-1.14734				17.578	13.2921	-1.04627	17.2058	13.9265	-0.570205							16.9633	14.0507	-0.623138
877	0.128	17.663	12.9545	-2.25012	17.4081	13.3083	-1.15493				17.5252	13.2539	-1.04406	17.2255	13.93	-0.568795							17.0179	14.0703	-0.623813
878	0.13	17.639	12.9305	-2.25602	17.4188	13.3138	-1.16485				17.5863	13.2847	-1.06687	17.2171	13.9135	-0.569642	17.2627	14.1116	-0.58388				16.9993	14.0408	-0.623876
879	0.132	17.6465	12.9228	-2.26432	17.4173	13.3018	-1.1776				17.5872	13.2851	-1.07693	17.2332	13.9178	-0.572892	17.2688	14.0914	-0.581734				16.9808	14.0208	-0.617928
880	0.134	17.6584	12.9167	-2.26864	17.4192	13.3025	-1.18467				17.5871	13.2847	-1.08209	17.2733	13.9147	-0.57386	17.2624	14.0691	-0.57954				16.9665	13.9991	-0.6159
881	0.136	17.6594	12.9049	-2.27452	17.4307	13.3082	-1.19251				17.5724	13.2548	-1.09147	17.2046	13.8493	-0.569525	17.2483	14.0425	-0.572801				16.9478	13.9756	-0.619901
882	0.138	17.6581	12.8924	-2.27887	17.4414	13.3135	-1.198				17.5946	13.2773	-1.08749	17.2221	13.8426	-0.569453	17.277	14.0465	-0.573313				16.9669	13.9753	-0.612913
883	0.14	17.6658	12.8841	-2.28519	17.4295	13.2963	-1.21007				17.5719	13.2535	-1.10691	17.1893	13.8203	-0.570739	17.2526	14.0127	-0.571473				16.9844	13.9698	-0.613782
884	0.142	17.6789	12.8799	-2.29155	17.4404	13.3016	-1.21888				17.6274	13.2939	-1.11401	17.2092	13.8265	-0.568581	17.2445	13.9889	-0.573369				17.0048	13.9705	-0.617677
885	0.144	17.6815	12.8675	-2.29843	17.4314	13.2868	-1.23017				17.6103	13.2619	-1.1187	17.2014	13.8106	-0.567806	17.2597	13.9899	-0.572742				16.9899	13.9451	-0.6106
886	0.146	17.6888	12.8599	-2.30084	17.4386	13.2892	-1.23572				17.6345	13.2852	-1.13493	17.2338	13.8121	-0.571671	17.2741	13.9861	-0.574706				16.9894	13.9296	-0.609396
887	0.148	17.6933	12.8492	-2.30932	17.4436	13.2915	-1.24656				17.59	13.2402	-1.14278	17.254	13.7979	-0.575711	17.2871	13.9807	-0.57327				16.9937	13.9159	-0.607908
888	0.15	17.6688	12.825	-2.31384	17.4271	13.2712	-1.25793				17.5919	13.241	-1.16294	17.263	13.8025	-0.576602	17.2735	13.947	-0.576916				17.0014	13.909	-0.607393
889	0.152	17.6697	12.8112	-2.31693	17.4478	13.2817	-1.2687				17.6204	13.2548	-1.1647	17.2772	13.792	-0.58211	17.3113	13.9682	-0.571289				17.0155	13.8999	-0.611301
890	0.154	17.6752	12.8019	-2.31922	17.4494	13.2827	-1.27461				17.6213	13.2552	-1.1748	17.2789	13.7788	-0.580578	17.3482	13.9807	-0.574446				17.0308	13.892	-0.613171
891	0.156	17.6748	12.7872	-2.32665	17.437	13.2651	-1.28498				17.5989	13.2323	-1.18384	17.3582	13.8169	-0.585116	17.3927	13.9895	-0.577599				17.0438	13.8822	-0.608508
892	0.158	17.6835	12.78	-2.33415	17.448	13.2696	-1.29162				17.6521	13.2707	-1.18647	17.2955	13.7534	-0.583869	17.4115	13.975	-0.580057				17.113	13.9088	-0.603253
893	0.16	17.6896	12.7714	-2.3379	17.4584	13.2756	-1.30191				17.6296	13.2477	-1.19551	17.3028	13.7434	-0.586158	17.4109	13.9628	-0.584886				17.1396	13.9119	-0.604231
894	0.162	17.6963	12.7629	-2.34585	17.4678	13.2804	-1.31028				17.6072	13.2248	-1.20452	17.3207	13.737	-0.587136	17.4161	13.9492	-0.590083				17.1368	13.8987	-0.606212
895	0.164	17.6737	12.7407	-2.34858	17.4588	13.2678	-1.32363				17.6689	13.256	-1.2228	17.3423	13.7369	-0.593217	17.4308	13.9416	-0.586877				17.1945	13.9223	-0.608711
896	0.166	17.6838	12.7358	-2.35382	17.4611	13.2655	-1.33036				17.64	13.2414	-1.23131	17.3573	13.74	-0.596193	17.4696	13.948	-0.593301				17.1541	13.8813	-0.612697
897	0.168	17.6898	12.7269	-2.35741	17.4704	13.2698	-1.33795				17.6719	13.2573	-1.25324	17.3389	13.7028	-0.602155	17.4438	13.917	-0.589199				17.1875	13.892	-0.60844
898	0.17	17.6969	12.7189	-2.3654	17.4577	13.252	-1.35027				17.6547	13.2255	-1.25255	17.3799	13.7154	-0.60693	17.4313	13.9002	-0.58412				17.1719	13.8601	-0.613013
899	0.172	17.6994	12.7062	-2.37424	17.4664	13.2566	-1.35841				17.6704	13.2559	-1.25344	17.4053	13.7015	-0.613862	17.456	13.8991	-0.59319				17.1628	13.8297	-0.613953
900	0.174	17.681	12.6885	-2.3741	17.475	13.2607	-1.36684				17.6257	13.2105	-1.26617	17.3987	13.6843	-0.619616	17.432	13.8662	-0.591716				17.1707	13.8132	-0.616867
901	0.176	17.7188	12.7098	-2.38724	17.4764	13.2612	-1.3719				17.6107	13.1802	-1.28054	17.4279	13.6996	-0.621967	17.4557	13.8642	-0.599079				17.1702	13.8022	-0.615892
902	0.178	17.6975	12.6725	-2.38756	17.4611	13.2419	-1.38602				17.634	13.203	-1.28692	17.4173	13.6758	-0.625174	17.3805	13.797	-0.59967				17.1812	13.7961	-0.625066
903	0.18	17.698	12.6605	-2.39416	17.4563	13.2282	-1.39711				17.6117	13.1806	-1.29066	17.4539	13.6862	-0.628258	17.4122	13.7959	-0.599954				17.2032	13.7968	-0.622516
904	0.182	17.7072	12.6544	-2.40326	17.4621	13.23	-1.40578				17.6659	13.2192	-1.30377	17.4615	13.6738	-0.635024	17.3769	13.7551	-0.604212				17.18	13.7619	-0.623018
905	0.184	17.6867	12.6347	-2.40287	17.4638	13.2316	-1.41056				17.6434	13.1962	-1.31266	17.4464	13.6404	-0.641651	17.4142	13.7636	-0.612887				17.1947	13.7597	-0.628446
906	0.186	17.6959	12.6286	-2.41212	17.4506	13.2135	-1.42809				17.6209	13.1734	-1.32153	17.4576	13.6442	-0.646676	17.3911	13.7282	-0.609813				17.1801	13.7388	-0.636939
907	0.188	17.7061	12.6238	-2.41479	17.471	13.2245	-1.43728				17.6209	13.1734	-1.32153	17.4117	13.5992	-0.646916	17.4245	13.7404	-0.610092				17.178	13.7241	-0.633558
908	0.19	17.7142	12.6168	-2.42365	17.4684	13.2223	-1.4424				17.6762	13.2124	-1.34492	17.4367	13.6099	-0.652018	17.4108	13.7144	-0.618927				17.1456	13.6721	-0.635727
909	0.192	17.7222	12.6098	-2.42793	17.4739	13.2233	-1.45204				17.6239	13.1746	-1.35196	17.4422	13.5947	-0.671824	17.4069	13.7068	-0.620678				17.1205	13.6429	-0.641979
910	0.194	17.7058	12.5937	-2.43412	17.4838	13.2299	-1.46093				17.6311	13.1666	-1.36259	17.4849	13.6057	-0.68601	17.4128	13.6939	-0.628221				17.115	13.6245	-0.643771
911	0.196	17.7152	12.5875	-2.4442	17.4739	13.2136	-1.47134				17.6332	13.1678	-1.37773	17.4907	13.5992	-0.690629	17.3991	13.6681	-0.633855				17.1586	13.6379	-0.651438
912	0.198	17.6961	12.5694	-2.44415	17.4805	13.2169	-1.48007				17.6352	13.1689	-1.39288	17.4855	13.5733	-0.701188	17.4346	13.6783	-0.644333				17.1299	13.6049	-0.652798
913	0.2	17.7028	12.561	-2.45308	17.4667	13.1981	-1.4951				17.6651	13.1838	-1.39476	17.476	13.5532	-0.709468	17.4455	13.6667	-0.653837				17.1385	13.5988	-0.659361
914	0.202	17.7159	12.5586	-2.46124	17.4659	13.1978	-1.501				17.6372	13.17	-1.40805	17.4888	13.5462	-0.718659	17.4186	13.631	-0.659178				17.1202	13.5693	-0.663402
915	0.204	17.698	12.5415	-2.46357	17.4827	13.2047	-1.50852				17.6435	13.1613	-1.41371	17.4782	13.5274	-0.72684	17.427	13.6212	-0.662181				17.16	13.5812	-0.669658
916	0.206	17.7103	12.5385	-2.46949	17.494	13.2114	-1.52176				17.6634	13.1817	-1.40529	17.4733	13.517	-0.738596	17.4453	13.6249	-0.668663				17.1725	13.584	-0.679008
917	0.208	17.7245	12.537	-2.48167	17.4728	13.1899	-1.52998				17.6895	13.2069	-1.41674	17.4565	13.4758	-0.77098	17.4205	13.5929	-0.678683				17.1251	13.5339	-0.675949
918	0.21	17.7113	12.4954	-2.4896	17.4797	13.1918	-1.53804				17.6732	13.1754	-1.42599	17.4503	13.4669	-0.774227	17.4133	13.5745	-0.689129				17.147	13.5342	-0.683954
919	0.212	17.7237	12.4919	-2.50492	17.5009	13.2035	-1.54563				17.6228	13.1385	-1.45315	17.4716	13.4705	-0.789817	17.4325	13.5702	-0.697669				17.146	13.5155	-0.69265
920	0.214	17.7673	12.5051	-2.5023	17.5001	13.2029	-1.55465				17.6448	13.1604	-1.45478	17.4947	13.4841	-0.794034	17.4323	13.5532	-0.705105				17.1366	13.4891	-0.699802
921	0.216	17.7584	12.4937	-2.50848	17.4865	13.1842	-1.56937				17.6163	13.1465	-1.45783	17.4959	13.4749	-0.806026	17.4554	13.5663	-0.710807				17.152	13.4945	-0.70776
922	0.218	17.7713	12.4929	-2.51675	17.4937	13.1881	-1.5756				17.6301	13.1305	-1.4638	17.5123	13.4738	-0.819283	17.4743	13.5645	-0.719205				17.1865	13.5017	-0.716724
923	0.22	17.7535	12.4765	-2.52176	17.5042	13.1931	-1.58346				17.5778	13.0925	-1.47565	17.5028	13.4611	-0.829942	17.4674	13.5465	-0.731445				17.1872	13.497	-0.724547
924	0.222	17.7709	12.478	-2.53288	17.4904	13.1748	-1.59291				17.6306	13.1299	-1.48432	17.4445	13.3932	-0.845745	17.4779	13.5404	-0.740112				17.1793	13.4722	-0.732481
925	0.224	17.7686	12.4752	-2.54134	17.4996	13.1791	-1.60438				17.6316	13.1303	-1.49451	17.4897	13.4338	-0.858592	17.4679	13.5194	-0.74816				17.1883	13.4703	-0.738547
926	0.226	17.7204	12.4296	-2.54017	17.5113	13.185	-1.61103				17.6388	13.1222	-1.50518	17.4911	13.4346	-0.87186	17.487	13.525	-0.762061				17.1917	13.4674	-0.748986
927	0.228	17.7577	12.4498	-2.55393	17.4935	13.1612	-1.62384				17.6398	13.1226	-1.51538	17.4867	13.43	-0.875287	17.4771	13.5054	-0.77127	17.6817	13.5546	-0.735694	17.2152	13.4705	-0.755925
928	0.23	17.744	12.4364	-2.55993	17.4882	13.1503	-1.63512				17.6634	13.1459	-1.51695	17.4792	13.4243	-0.886604	17.4945	13.5185	-0.78048	17.6898	13.5485	-0.742996	17.2132	13.4598	-0.765255
929	0.232	17.7621	12.4385	-2.57205	17.4899	13.1519	-1.64147				17.6483	13.1155	-1.53109	17.4847	13.4291	-0.901652	17.4807	13.4948	-0.791783	17.7092	13.5452	-0.757691	17.1818	13.4199	-0.771988
930	0.234	17.7497	12.4263	-2.57867	17.5005	13.1563	-1.64637				17.6727	13.1386	-1.54809	17.4891	13.4278	-0.918346	17.4938	13.4998	-0.795986	17.7228	13.5497	-0.7648	17.2166	13.4399	-0.784056
931	0.236	17.7641	12.4251	-2.58828	17.489	13.1393	-1.66192				17.619	13.1	-1.54953	17.495	13.4285	-0.927158	17.5102	13.5012	-0.808616	17.7104	13.5331	-0.772006	17.2444	13.4583	-0.795601
932	0.238	17.7499	12.4111	-2.59731	17.4992	13.144	-1.66755				17.6487	13.1148	-1.55163	17.4901	13.4228	-0.939085	17.4971	13.4857	-0.818585	17.7165	13.5214	-0.78574	17.2397	13.4484	-0.80215
933	0.24	17.7457	12.406	-2.6141	17.5144	13.1517	-1.67289				17.6809	13.1309	-1.56903	17.5096	13.4421	-0.951564	17.5042	13.4893	-0.82723	17.7035	13.5002	-0.794401	17.2093	13.412	-0.811799
934	0.242	17.7032	12.3522	-2.60791	17.5033	13.1344	-1.68941				17.6806	13.1303	-1.57421	17.5096	13.4438	-0.967439	17.5176	13.4918	-0.842561	17.7075	13.4978	-0.805054	17.2433	13.4375	-0.825467
935	0.244	17.6931	12.342	-2.61691	17.5247	13.1446	-1.69887				17.657	13.1071	-1.57254	17.5134	13.4515	-0.9883	17.5203	13.4935	-0.852787	17.7378	13.5142	-0.820514	17.231	13.4236	-0.837553
936	0.246	17.7089	12.342	-2.62783	17.5131	13.1299	-1.70786				17.6593	13.1084	-1.58783	17.5134	13.4579	-1.01042	17.514	13.4865	-0.86285	17.7406	13.5149	-0.833186	17.2521	13.4455	-0.846063
937	0.248	17.6874	12.3213	-2.63357	17.5068	13.1241	-1.71361				17.6367	13.0856	-1.59636	17.5331	13.4828	-1.01388	17.5164	13.4869	-0.877062	17.7456	13.5196	-0.839653	17.2239	13.4165	-0.854635
938	0.25	17.6865	12.3199	-2.64261	17.5344	13.1379	-1.72158				17.644	13.0775	-1.60705	17.5387	13.5029	-1.02477	17.5214	13.4911	-0.891696	17.7634	13.5259	-0.861873	17.2365	13.4266	-0.866345
939	0.252	17.7054	12.3227	-2.65493	17.5152	13.1193	-1.72525				17.6436	13.0769	-1.61222	17.4996	13.4577	-1.0309	17.5215	13.4939	-0.900374	17.7729	13.535	-0.873067	17.2487	13.4435	-0.878277
940	0.254	17.6973	12.3145	-2.66368	17.5412	13.1294	-1.74119				17.6748	13.0926	-1.61948	17.5097	13.4724	-1.04467	17.5097	13.4834	-0.913975	17.7958	13.5452	-0.89126	17.2284	13.4126	-0.881122
941	0.256	17.7176	12.3179	-2.6862	17.5211	13.1081	-1.75016				17.682	13.0845	-1.63019	17.5171	13.4841	-1.06069	17.5093	13.4861	-0.929544	17.7974	13.546	-0.907084	17.267	13.4446	-0.890354
942	0.258	17.7082	12.3085	-2.69424	17.551	13.1223	-1.7637				17.6604	13.062	-1.64892	17.5085	13.4895	-1.07255	17.5149	13.4934	-0.945893	17.801	13.5474	-0.922467	17.2601	13.4395	-0.902567
943	0.26	17.7004	12.3006	-2.7021	17.5279	13.0984	-1.77063				17.6604	13.062	-1.64892	17.4881	13.4808	-1.07997	17.5195	13.5011	-0.960436	17.7934	13.5389	-0.940036	17.2559	13.4373	-0.909394
944	0.262	17.7211	12.305	-2.71468	17.5262	13.0879	-1.77835				17.6614	13.0624	-1.65916	17.4831	13.48	-1.09228	17.5169	13.5011	-0.97079	17.8015	13.5461	-0.957925	17.2776	13.4589	-0.928746
945	0.264	17.7087	12.2928	-2.72198	17.5406	13.0943	-1.78654				17.6688	13.0548	-1.6647	17.5056	13.495	-1.10612	17.5343	13.5212	-0.987678	17.8145	13.5596	-0.978748	17.2592	13.4538	-0.94145
946	0.266	17.7034	12.2881	-2.73155	17.5166	13.0684	-1.79373				17.6682	13.0537	-1.67503	17.5392	13.5301	-1.10906	17.5198	13.5073	-0.998694	17.7532	13.5197	-0.987511	17.2578	13.4591	-0.946262
947	0.268	17.6961	12.2802	-2.73317	17.535	13.0771	-1.79952				17.6472	13.0324	-1.68337	17.5458	13.5295	-1.13912	17.521	13.5146	-1.01699	17.7936	13.5551	-1.00363	17.2544	13.4557	-0.962984
948	0.27	17.6898	12.2736	-2.7425	17.5331	13.0676	-1.81141				17.6531	13.0233	-1.689	17.5468	13.5391	-1.15004	17.5312	13.525	-1.03723	17.8025	13.5742	-1.01205	17.2745	13.4719	-0.9793
949	0.272	17.7058	12.2737	-2.75577	17.5334	13.0588	-1.81783				17.6541	13.0237	-1.69924	17.5472	13.5485	-1.15536	17.5359	13.5388	-1.04862	17.7991	13.5684	-1.0224	17.2605	13.4622	-0.9998
950	0.274	17.702	12.2695	-2.76429	17.5355	13.0585	-1.82407				17.6836	13.0377	-1.70673	17.5554	13.5554	-1.18041	17.5272	13.5317	-1.05864	17.8267	13.5881	-1.04654	17.2645	13.467	-1.01385
951	0.276	17.696	12.2628	-2.77435	17.5218	13.035	-1.83262				17.686	13.0391	-1.72209	17.5546	13.563	-1.19097	17.506	13.5251	-1.06992	17.8288	13.5979	-1.07027	17.2798	13.4832	-1.03124
952	0.278	17.6866	12.2536	-2.78384	17.5455	13.0496	-1.84227				17.6921	13.0305	-1.72255	17.5688	13.5739	-1.20703	17.4991	13.5291	-1.08806	17.828	13.6098	-1.08553	17.2517	13.4668	-1.03759
953	0.28	17.6847	12.2511	-2.79328	17.5388	13.0323	-1.84728				17.6681	13.0067	-1.72582	17.5673	13.5738	-1.23062	17.51	13.5433	-1.10499	17.8294	13.6178	-1.10244	17.2501	13.4706	-1.05385
954	0.282	17.677	12.2433	-2.80285	17.5277	13.018	-1.85845				17.6993	13.0223	-1.73328	17.5561	13.5736	-1.24881	17.5061	13.5441	-1.12275	17.8309	13.6259	-1.12105	17.2667	13.4854	-1.06905
955	0.284	17.6725	12.238	-2.81605	17.5425	13.0225	-1.86196				17.7003	13.0227	-1.74355	17.5604	13.5774	-1.26149	17.5128	13.5515	-1.13266	17.8351	13.6322	-1.14064	17.2755	13.4977	-1.08437
956	0.286	17.6936	12.2431	-2.8252	17.5437	13.0125	-1.87183				17.6834	12.9907	-1.75752	17.5401	13.5616	-1.28084	17.5167	13.5607	-1.15209	17.8139	13.6192	-1.1526	17.2724	13.4984	-1.10218
957	0.288	17.6959	12.2443	-2.83961	17.5432	13.0029	-1.88275				17.6847	12.9916	-1.76262	17.5553	13.5886	-1.29503	17.5064	13.5554	-1.16539	17.7917	13.6116	-1.15764	17.2851	13.5127	-1.12024
958	0.29	17.6937	12.2413	-2.8524	17.5628	13.0112	-1.88518				17.6918	12.9834	-1.77335	17.5571	13.5991	-1.3046	17.522	13.5751	-1.1825	17.8186	13.6329	-1.18508	17.2818	13.5168	-1.13508
959	0.292	17.6855	12.233	-2.86042	17.5468	12.9926	-1.89524				17.6915	12.9828	-1.77851	17.5015	13.541	-1.32063	17.5115	13.5665	-1.20167	17.7936	13.6263	-1.19959	17.2705	13.5109	-1.1549
960	0.294	17.6812	12.2284	-2.86869	17.5513	12.9845	-1.90227				17.6688	12.9601	-1.7868	17.5815	13.6125	-1.35045	17.5134	13.578	-1.21935	17.8132	13.6552	-1.2274	17.278	13.5269	-1.17308
961	0.296	17.6729	12.2199	-2.87936	17.5648	12.9809	-1.9157				17.7043	12.9653	-1.79485	17.5631	13.6052	-1.37193	17.5079	13.5764	-1.22845	17.8046	13.6583	-1.23591	17.2957	13.5471	-1.19604
962	0.298	17.6669	12.2139	-2.88854	17.567	12.9787	-1.92028				17.706	12.9669	-1.79481	17.5703	13.6151	-1.37938	17.5372	13.605	-1.25762	17.818	13.6694	-1.25444	17.298	13.5518	-1.21093
963	0.3	17.6678	12.2131	-2.89843	17.5695	12.9692	-1.93035				17.7141	12.959	-1.81583	17.5683	13.6121	-1.3978	17.5313	13.6091	-1.26831	17.8708	13.7126	-1.27884	17.3105	13.5582	-1.22581
964	0.302	17.6664	12.2116	-2.90709	17.5545	12.9503	-1.93537				17.7138	12.9584	-1.821	17.5888	13.6319	-1.41969	17.5347	13.6218	-1.29049	17.8761	13.7135	-1.28685	17.2872	13.5459	-1.24506
965	0.304	17.6591	12.2041	-2.91723	17.5556	12.9388	-1.9456				17.7199	12.9498	-1.82145	17.5584	13.6091	-1.43307	17.538	13.626	-1.30877	17.8717	13.7155	-1.30768	17.2874	13.5578	-1.2597
966	0.306	17.6525	12.1971	-2.92679	17.5548	12.9262	-1.94977				17.6984	12.928	-1.8348	17.5734	13.6265	-1.45338	17.5194	13.6135	-1.32427	17.8655	13.7104	-1.32149	17.2805	13.5543	-1.2822
967	0.308	17.6477	12.1917	-2.94034	17.5573	12.9242	-1.95663				17.7045	12.9193	-1.83524	17.5657	13.624	-1.46946	17.5056	13.609	-1.34242	17.8568	13.7158	-1.34001	NaN	NaN	NaN
968	0.31	17.645	12.1884	-2.95097	17.5594	12.9138	-1.96604				17.7052	12.9191	-1.85069	17.5606	13.627	-1.47903	17.527	13.6262	-1.35388	17.8471	13.7127	-1.35488	NaN	NaN	NaN
969	0.312	17.6358	12.179	-2.96042	17.5617	12.9029	-1.97077				17.7122	12.9108	-1.86142	17.5661	13.6282	-1.50276	17.5264	13.6293	-1.3678	17.8342	13.7062	-1.37292	NaN	NaN	NaN
970	0.314	17.634	12.1766	-2.97011	17.5686	12.8976	-1.9781				17.6898	12.8887	-1.86444	17.5764	13.6381	-1.5158	17.5452	13.6462	-1.39458	17.8339	13.7032	-1.3877	NaN	NaN	NaN
971	0.316	17.6327	12.1748	-2.97851	17.5639	12.8875	-1.98763				17.6968	12.8804	-1.87516	17.5688	13.6388	-1.52862	17.5506	13.659	-1.41753	17.8208	13.6986	-1.40336	NaN	NaN	NaN
972	0.318	17.6319	12.1733	-2.98862	17.5677	12.8773	-1.99339				17.7266	12.8947	-1.87773	17.5805	13.6499	-1.54578	17.5243	13.6382	-1.4395	17.7967	13.6836	-1.40844	NaN	NaN	NaN
973	0.32	17.637	12.177	-3.00395	17.5826	12.8799	-2.00024				17.6788	12.8482	-1.87863	17.5628	13.6431	-1.55989	17.5395	13.6548	-1.45435	17.802	13.6905	-1.4343	NaN	NaN	NaN
974	0.322	17.6281	12.1682	-3.01009	17.5668	12.8592	-2.00786				17.7095	12.8628	-1.89148	17.5683	13.6416	-1.57973	17.5352	13.6538	-1.47571	17.8256	13.7178	-1.45924	NaN	NaN	NaN
975	0.324	17.6318	12.1713	-3.01422	17.5778	12.8553	-2.0169				17.7165	12.8545	-1.90221	17.5621	13.6403	-1.60098	17.5267	13.6496	-1.50321	17.8206	13.7094	-1.47607	NaN	NaN	NaN
976	0.326	17.6192	12.1585	-3.02753	17.5809	12.8454	-2.01843				17.7463	12.8688	-1.90481	17.5755	13.65	-1.61937	17.5077	13.6395	-1.52342	17.8093	13.7093	-1.49568	NaN	NaN	NaN
977	0.328	17.6155	12.1541	-3.04078	17.5891	12.8401	-2.02897				17.7532	12.8604	-1.91556	17.5643	13.6255	-1.63391	17.5237	13.6479	-1.53636	17.8114	13.7144	-1.50962	NaN	NaN	NaN
978	0.33	17.6152	12.1529	-3.05266	17.5768	12.8215	-2.03811				17.7545	12.8613	-1.9207	17.5508	13.6256	-1.65445	17.5079	13.6396	-1.5552	17.8084	13.7105	-1.54163	NaN	NaN	NaN
979	0.332	17.6137	12.1509	-3.06195	17.5951	12.8263	-2.04476				17.7373	12.8293	-1.93439	17.5793	13.6422	-1.67232	17.5146	13.6436	-1.58222	17.8172	13.7207	-1.5676	NaN	NaN	NaN
980	0.334	17.6063	12.1433	-3.07024	17.6057	12.822	-2.05392				17.7433	12.8206	-1.93482	17.5864	13.6482	-1.69661	17.5155	13.6439	-1.59518	17.815	13.7132	-1.58314	NaN	NaN	NaN
981	0.336	17.6309	12.1513	-3.08449	17.6089	12.8123	-2.06065				17.7207	12.7985	-1.93774	17.5961	13.6482	-1.71606	17.5115	13.6417	-1.61752	17.7858	13.6977	-1.60537	NaN	NaN	NaN
982	0.338	17.6269	12.1468	-3.09563	17.5994	12.7973	-2.06437				17.7274	12.7896	-1.95361	17.5674	13.62	-1.74239	17.5363	13.6543	-1.6344	17.7901	13.7011	-1.61978	NaN	NaN	NaN
983	0.34	17.6191	12.1406	-3.10388	17.5993	12.784	-2.07413				17.7581	12.8041	-1.9666	17.582	13.6281	-1.7548	17.5294	13.6508	-1.65445	17.7991	13.7089	-1.64603	NaN	NaN	NaN
984	0.342	17.6194	12.1383	-3.11499	17.5995	12.7705	-2.08194				17.7102	12.7578	-1.96721	17.5677	13.6128	-1.77035	17.5333	13.6526	-1.66767	17.8082	13.7127	-1.6656	NaN	NaN	NaN
985	0.344	17.6106	12.1295	-3.12319	17.5931	12.758	-2.08313				17.7175	12.7504	-1.96763	17.5824	13.6205	-1.79428	17.5392	13.6557	-1.69053	17.8089	13.7164	-1.69017	NaN	NaN	NaN
986	0.346	17.6036	12.1231	-3.13342	17.6012	12.7532	-2.09383				17.7242	12.7415	-1.98348	17.568	13.6016	-1.81049	17.57	13.6725	-1.71728	17.8083	13.7149	-1.70771	NaN	NaN	NaN
987	0.348	17.604	12.1218	-3.14329	17.6034	12.741	-2.10313				17.7242	12.7415	-1.98348	17.5855	13.6128	-1.82655	17.5706	13.6725	-1.73229	17.8262	13.725	-1.72886	NaN	NaN	NaN
988	0.35	17.6003	12.1176	-3.15249	17.6128	12.7441	-2.10522				17.7607	12.7471	-1.99692	17.5992	13.6136	-1.84512	17.5615	13.6677	-1.75222	17.8354	13.7302	-1.75407	NaN	NaN	NaN
989	0.352	17.637	12.1369	-3.16807	17.6191	12.7354	-2.11344				17.7379	12.7246	-2.0049	17.6046	13.6062	-1.86125	17.5535	13.6523	-1.77592	17.8361	13.7285	-1.7707	NaN	NaN	NaN
990	0.354	17.613	12.114	-3.1741	17.6249	12.7279	-2.11957				17.7746	12.7307	-2.01321	17.6164	13.6052	-1.87988	17.5696	13.6607	-1.78971	17.844	13.7335	-1.79107	NaN	NaN	NaN
991	0.356	17.6156	12.1155	-3.18574	17.6099	12.7071	-2.12731				17.7264	12.684	-2.01883	17.5969	13.5905	-1.89262	17.5751	13.6638	-1.80928	17.8489	13.7346	-1.81061	NaN	NaN	NaN
992	0.358	17.5923	12.0934	-3.19045	17.6092	12.6931	-2.13281				17.7575	12.6994	-2.02159	17.6139	13.5948	-1.91171	17.5467	13.6247	-1.82191	17.8418	13.7228	-1.83	NaN	NaN	NaN
993	0.36	17.5838	12.0835	-3.20454	17.619	12.689	-2.14171				17.7641	12.6904	-2.03745	17.5862	13.5688	-1.91944	17.5552	13.6294	-1.84173	17.8332	13.7173	-1.84759	NaN	NaN	NaN
994	0.362	17.5726	12.0731	-3.2128	17.6299	12.6851	-2.14784				17.7699	12.6816	-2.03786	17.5934	13.5631	-1.93661	17.5601	13.6207	-1.86627	17.8483	13.7208	-1.86634	NaN	NaN	NaN
995	0.364	17.5964	12.0806	-3.22581	17.6157	12.6647	-2.15686				17.7525	12.6498	-2.05132	17.6206	13.5716	-1.96104	17.5716	13.6229	-1.87874	17.8433	13.7101	-1.88159	NaN	NaN	NaN
996	0.366	17.5883	12.0723	-3.23462	17.6154	12.651	-2.1659				17.7537	12.6506	-2.05648	17.6226	13.5639	-1.97035	17.5454	13.5935	-1.89447	17.8304	13.6965	-1.89936	17.2987	13.562	-1.82203
997	0.368	17.5827	12.0666	-3.244	17.6141	12.6371	-2.17378				17.7605	12.6421	-2.06718	17.6522	13.5813	-1.98566	17.5558	13.5943	-1.90933	17.8478	13.6978	-1.91921	17.2959	13.555	-1.83908
998	0.37	17.5711	12.0549	-3.25233	17.631	12.6406	-2.17764				17.766	12.6327	-2.07272	17.644	13.5629	-1.9993	17.5242	13.5613	-1.91829	17.8505	13.6994	-1.93861	17.3261	13.5712	-1.85147
999	0.372	17.5581	12.0424	-3.2569	17.6149	12.6195	-2.18664				17.7727	12.6242	-2.08342	17.6665	13.5794	-2.00769	17.5496	13.5697	-1.93608	17.8513	13.6995	-1.95207	17.3183	13.5559	-1.86829
1000	0.374	17.565	12.0343	-3.2659	17.6301	12.6222	-2.19403				17.75	12.6023	-2.08613	17.5976	13.5056	-2.01338	17.5457	13.5558	-1.95067	NaN	NaN	NaN	17.3015	13.5358	-1.88085
1001	0.376	17.5606	12.029	-3.28018	17.6295	12.61	-2.19898				17.7567	12.5938	-2.09682	17.5741	13.4814	-2.01733	17.5581	13.5527	-1.96315	NaN	NaN	NaN	17.3135	13.5318	-1.89448
1002	0.378	17.5518	12.0202	-3.28893	17.6202	12.5963	-2.20761				17.7324	12.5701	-2.10461	17.6264	13.5158	-2.03267	17.5208	13.517	-1.97146	NaN	NaN	NaN	17.3451	13.5464	-1.91028
1003	0.38	17.5666	12.0193	-3.30068	17.6222	12.5859	-2.21324				17.7686	12.5753	-2.11817	17.6504	13.5001	-2.04393	17.5472	13.5237	-1.98313	NaN	NaN	NaN	17.3646	13.5506	-1.93005
1004	0.382	17.5528	12.0058	-3.30893	17.6219	12.5739	-2.22003				17.7982	12.589	-2.12106	17.5803	13.4408	-2.04419	17.5733	13.542	-1.9975	NaN	NaN	NaN	17.3661	13.5515	-1.94131
1005	0.384	17.5726	12.0094	-3.32269	17.6189	12.5609	-2.22996				17.782	12.5581	-2.13955	17.6102	13.4556	-2.05232	17.5879	13.5424	-2.0144	NaN	NaN	NaN	17.3433	13.5273	-1.95467
1006	0.386	17.5618	11.9968	-3.33179	17.6203	12.5498	-2.24059				17.7595	12.5369	-2.13705	17.6042	13.4429	-2.06414	17.582	13.5345	-2.02109	NaN	NaN	NaN	17.3727	13.5407	-1.96167
1007	0.388	17.5668	11.9887	-3.34046	17.6181	12.5376	-2.24597				17.7956	12.542	-2.15066	17.6373	13.4554	-2.06517	17.5845	13.5289	-2.0316	NaN	NaN	NaN	17.3561	13.5228	-1.96865
1008	0.39	17.553	11.9739	-3.34774	17.6263	12.5408	-2.25325				17.7965	12.5417	-2.16611	17.6203	13.4227	-2.07268	17.5902	13.5205	-2.03934	NaN	NaN	NaN	17.3059	13.4872	-1.97134
1009	0.392	17.5691	11.9756	-3.35994	17.6266	12.5293	-2.26355				17.7735	12.5194	-2.17384	17.6478	13.444	-2.08268	17.6183	13.5291	-2.04769	NaN	NaN	NaN	17.3362	13.5017	-1.97865
1010	0.394	17.5443	11.9521	-3.36386	17.6358	12.5219	-2.27563				17.7803	12.5113	-2.17939	17.6615	13.4365	-2.08596	17.6156	13.5201	-2.05023	NaN	NaN	NaN	17.3936	13.5292	-2.0082
1011	0.396	17.5599	11.952	-3.37462	17.6222	12.5042	-2.2809				17.7857	12.5019	-2.1849	17.704	13.4582	-2.09115	17.6098	13.506	-2.06082	NaN	NaN	NaN	17.382	13.5133	-2.02194
1012	0.398	17.555	11.9466	-3.38662	17.6422	12.5132	-2.29388				17.7628	12.4797	-2.1926	17.6512	13.4117	-2.07655	17.6046	13.4855	-2.06151	NaN	NaN	NaN	17.3618	13.4889	-2.03228
1013	0.4	17.5602	11.9372	-3.39606	17.64	12.5007	-2.29871				17.799	12.4851	-2.20114	17.6771	13.4164	-2.08084	17.6154	13.4871	-2.06877	NaN	NaN	NaN	17.3269	13.46	-2.03353
1014	0.402	17.5306	11.9092	-3.39726	17.6349	12.4867	-2.30915				17.7761	12.4629	-2.20881	17.657	13.3873	-2.07763	17.5999	13.4653	-2.06798	NaN	NaN	NaN	17.3322	13.4486	-2.03967
1015	0.404	17.5437	11.9064	-3.40775	17.629	12.4704	-2.31965				17.7815	12.4535	-2.21431	17.6234	13.3483	-2.06288	17.6153	13.4672	-2.06993	NaN	NaN	NaN	17.3164	13.4111	-2.04057
1016	0.406	17.542	11.8906	-3.41813	17.6523	12.483	-2.32436				17.788	12.4448	-2.22498	17.63	13.3401	-2.06128	17.6378	13.4628	-2.07267	NaN	NaN	NaN	17.3499	13.4243	-2.04691
1017	0.408	17.5256	11.8749	-3.42399	17.6354	12.4637	-2.33154				17.7954	12.4358	-2.25107	17.6491	13.3328	-2.05577	17.6803	13.4663	-2.07912	NaN	NaN	NaN	17.3745	13.4287	-2.04578
1018	0.41	17.5367	11.8711	-3.42916	17.6398	12.4531	-2.34358				17.7726	12.4142	-2.25355	17.6761	13.3419	-2.05619	17.6984	13.4695	-2.08155	17.7597	13.4903	-2.13934	17.3814	13.4208	-2.04318
1019	0.412	17.5353	11.8553	-3.43833	17.6272	12.438	-2.35322				17.8021	12.4277	-2.25662	17.6538	13.3047	-2.05378	17.6772	13.4347	-2.07754	17.7578	13.4673	-2.13909	17.3646	13.3886	-2.04236
1020	0.414	17.5515	11.8557	-3.45115	17.6196	12.4216	-2.36107				17.8084	12.4184	-2.27242	17.6234	13.2659	-2.04132	17.6683	13.4123	-2.07616	17.8017	13.4838	-2.14807	17.3534	13.3712	-2.04012
1021	0.416	17.5235	11.8296	-3.45383	17.6355	12.4284	-2.37096				17.8151	12.4102	-2.27798	17.6405	13.2628	-2.03354	17.6491	13.3826	-2.0724	17.7875	13.4547	-2.14254	17.3486	13.3453	-2.03941
1022	0.418	17.5345	11.826	-3.46169	17.6259	12.411	-2.37813				17.8161	12.4105	-2.28829	17.6682	13.2726	-2.03289	17.6642	13.3739	-2.07207	17.7798	13.4203	-2.13646	17.361	13.34	-2.04048
1023	0.42	17.5351	11.8114	-3.4715	17.6442	12.4205	-2.38849				17.8225	12.4017	-2.29897	17.6449	13.2257	-2.02928	17.6608	13.3465	-2.07199	17.8076	13.4209	-2.13863	17.368	13.3201	-2.04091
1024	0.422	17.5454	11.8063	-3.48419	17.638	12.4061	-2.39592				17.7754	12.3568	-2.30883	17.694	13.257	-2.0289	17.6505	13.329	-2.06821	17.7889	13.3931	-2.13888	17.3329	13.2764	-2.03191
1025	0.424	17.5377	11.7994	-3.47999	17.6289	12.3902	-2.40622				17.8048	12.3701	-2.31198	17.6904	13.2296	-2.02823	17.6988	13.3409	-2.06581	17.8283	13.4019	-2.14651	17.3286	13.2507	-2.02741
1026	0.426	17.5445	11.7913	-3.49175	17.6218	12.3749	-2.41716				17.8056	12.3698	-2.3274	17.6783	13.2001	-2.02273	17.6735	13.3087	-2.05499	17.8383	13.3911	-2.14453	17.3402	13.2357	-2.02935
1027	0.428	17.5264	11.7607	-3.49257	17.6367	12.382	-2.42679				17.7893	12.3395	-2.34044	17.6843	13.1824	-2.02091	17.7108	13.3159	-2.06076	17.8091	13.3563	-2.13881	17.314	13.2037	-2.02526
1028	0.43	17.5296	11.7492	-3.5029	17.6312	12.369	-2.43506				17.7891	12.339	-2.34554	17.6968	13.1861	-2.01901	17.7385	13.3228	-2.05835	17.7946	13.3245	-2.12938	17.3738	13.2409	-2.02638
1029	0.432	17.5206	11.7267	-3.50917	17.6177	12.3501	-2.44484				17.7661	12.317	-2.35299	17.6781	13.1559	-2.01598	17.7106	13.295	-2.05639	17.7936	13.3119	-2.12571	17.3787	13.2225	-2.01921
1030	0.434	17.491	11.6995	-3.50956	17.6353	12.358	-2.45473				17.7725	12.3082	-2.36363	17.6813	13.1386	-2.012	17.7143	13.2704	-2.05615	17.8049	13.296	-2.1272	17.3877	13.2137	-2.01902
1031	0.436	17.5019	11.6948	-3.52523	17.6267	12.3435	-2.46653				17.807	12.3119	-2.37229	17.6698	13.1071	-2.00455	17.7344	13.2682	-2.05644	17.8068	13.2857	-2.12939	17.3523	13.1605	-2.01209
1032	0.438	17.5043	11.6825	-3.53591	17.64	12.3482	-2.47421				17.8095	12.3134	-2.38272	17.713	13.1169	-2.0146	17.7402	13.2561	-2.05494	17.8584	13.3097	-2.13617	17.3224	13.1218	-2.00401
1033	0.44	17.5077	11.6725	-3.53064	17.6296	12.3317	-2.48692				17.7863	12.2909	-2.39522	17.6682	13.0733	-2.00209	17.7407	13.2404	-2.05228	17.8754	13.2924	-2.13755	17.3335	13.1213	-2.00074
1034	0.442	17.4928	11.644	-3.5473	17.6309	12.3224	-2.49719				17.7929	12.2827	-2.40077	17.7227	13.0886	-2.007	17.7179	13.2089	-2.04953	17.8611	13.2714	-2.12837	17.4002	13.1619	-2.00732
1035	0.444	17.4566	11.6106	-3.55102	17.6329	12.3216	-2.50334				17.771	12.2614	-2.41333	17.6802	13.0441	-2.00291	17.7047	13.1891	-2.0387	17.8932	13.2794	-2.12078	17.4028	13.1468	-2.00532
1036	0.446	17.4529	11.5931	-3.55892	17.6203	12.3033	-2.51626				17.7719	12.2611	-2.42874	17.7519	13.0884	-2.00146	17.7611	13.2165	-2.04621	17.8568	13.2379	-2.12103	17.3536	13.1036	-1.99551
1037	0.448	17.4743	11.5982	-3.57146	17.6129	12.2894	-2.52567				17.7784	12.2528	-2.43427	17.754	13.0612	-1.99936	17.765	13.1997	-2.04481	17.8381	13.2012	-2.11536	17.3904	13.1176	-1.98948
1038	0.45	17.4775	11.5872	-3.57594	17.6246	12.2941	-2.53675				17.7834	12.2428	-2.4448	17.7462	13.0361	-1.99746	17.7076	13.1389	-2.03581	17.8748	13.2149	-2.11897	17.3367	13.0718	-1.99576
1039	0.452	17.4667	11.5638	-3.57637	17.6214	12.2813	-2.54745				17.7844	12.243	-2.45511	17.7416	13.0201	-1.99482	17.7279	13.1294	-2.03667	17.8052	13.1393	-2.10276	17.3451	13.0715	-1.99419
1040	0.454	17.4702	11.5529	-3.58451	17.6315	12.2852	-2.55917				17.7615	12.2211	-2.4624	17.7841	13.0292	-1.99963	17.7384	13.1253	-2.03291	17.8141	13.1323	-2.10303	17.4015	13.0927	-2.00175
1041	0.456	17.471	11.5393	-3.59695	17.6156	12.268	-2.56669				17.7678	12.2123	-2.47303	17.7881	13.0099	-1.99676	17.76	13.12	-2.03414	17.8354	13.131	-2.10151	17.3428	13.0286	-1.9878
1042	0.458	17.4188	11.4924	-3.58823	17.6323	12.274	-2.57564				17.7688	12.2125	-2.48333	17.7515	12.9712	-1.99521	17.7489	13.086	-2.02901	17.8481	13.1233	-2.10288	17.3422	13.005	-1.98022
1043	0.46	17.5088	11.5591	-3.61059	17.6129	12.2538	-2.58682				17.7763	12.2044	-2.49918	17.7847	12.9712	-2.0022	17.7638	13.0772	-2.02732	17.8546	13.1088	-2.09751	17.3617	13.0008	-1.98597
1044	0.462	17.4911	11.5288	-3.61111	17.609	12.2404	-2.59446				17.7522	12.1818	-2.50119	17.7551	12.931	-1.99618	17.7722	13.0576	-2.02718	17.8997	13.1231	-2.09583	17.3625	12.9843	-1.98228
1045	0.464	17.4924	11.5166	-3.61723	17.6185	12.2437	-2.60987				17.7543	12.1827	-2.5167	17.7851	12.9456	-1.9979	17.7627	13.0367	-2.02455	NaN	NaN	NaN	17.3918	12.9812	-1.98724
1046	0.466	17.4972	11.5073	-3.62111	17.6059	12.2268	-2.61746				17.7593	12.1726	-2.52719	17.7834	12.9235	-1.99966	17.7451	13.0139	-2.02025	NaN	NaN	NaN	17.3903	12.9711	-1.98298
1047	0.468	17.4911	11.4879	-3.62627	17.6172	12.2315	-2.62852				17.7603	12.1728	-2.53749	17.7591	12.8913	-1.99817	17.7296	12.9785	-2.01633	NaN	NaN	NaN	17.388	12.9458	-1.97987
1048	0.47	17.4702	11.4686	-3.63107	17.6039	12.2139	-2.63922				17.7666	12.164	-2.54811	17.8056	12.9015	-1.99935	17.7331	12.9673	-2.01602	NaN	NaN	NaN	17.4125	12.9494	-1.98561
1049	0.472	17.4711	11.4558	-3.6339	17.6087	12.2148	-2.64965				17.7448	12.143	-2.56049	17.7319	12.8243	-1.99831	17.7454	12.9546	-2.01597	NaN	NaN	NaN	17.4179	12.9403	-1.98487
1050	0.474	17.4769	11.4465	-3.64434	17.6064	12.2033	-2.65929				17.775	12.1561	-2.57429	17.7192	12.7973	-2.0041	17.7531	12.9314	-2.01902	NaN	NaN	NaN	17.4182	12.9173	-1.98521
1051	0.476	17.4778	11.4339	-3.64952	17.6076	12.2031	-2.66981				17.7509	12.1336	-2.57617	17.7363	12.7965	-2.00348	17.7608	12.9213	-2.02058	NaN	NaN	NaN	17.3747	12.8744	-1.97815
1052	0.478	17.4797	11.4221	-3.65314	17.5911	12.1836	-2.68246				17.7531	12.1345	-2.59171	17.7001	12.7554	-2.01124	17.7153	12.8774	-2.01352	NaN	NaN	NaN	17.3885	12.8735	-1.98172
1053	0.48	17.4563	11.4005	-3.65716	17.609	12.192	-2.69173				17.7303	12.1133	-2.59372	17.8012	12.7919	-2.02051	17.7448	12.8798	-2.01929	NaN	NaN	NaN	17.3608	12.8352	-1.97959
1054	0.482	17.4595	11.3894	-3.66544	17.5955	12.1742	-2.70171				17.7656	12.1173	-2.60785	17.7922	12.7716	-2.02048	17.7474	12.8576	-2.02035	NaN	NaN	NaN	17.3654	12.8192	-1.98069
1055	0.484	17.4613	11.3772	-3.67214	17.6049	12.1784	-2.71408				17.7665	12.1169	-2.62326	17.7827	12.7503	-2.03074	17.7383	12.8381	-2.02151	NaN	NaN	NaN	17.4004	12.8128	-1.98315
1056	0.486	17.4608	11.3633	-3.67415	17.5828	12.1574	-2.72371				17.7966	12.1294	-2.64226	17.7705	12.724	-2.0334	17.7027	12.791	-2.02183	NaN	NaN	NaN	17.349	12.7718	-1.98202
1057	0.488	17.467	11.3549	-3.68326	17.5997	12.1645	-2.73				17.7988	12.1304	-2.65786	17.7841	12.7281	-2.04079	17.7107	12.784	-2.02764	NaN	NaN	NaN	17.3931	12.7795	-1.98448
1058	0.49	17.4411	11.3313	-3.68631	17.587	12.1477	-2.74663				17.7748	12.1084	-2.65454	17.7937	12.7026	-2.0444	17.7034	12.7644	-2.02613	NaN	NaN	NaN	17.4067	12.7614	-1.98274
1059	0.492	17.4511	11.3259	-3.69529	17.5926	12.1492	-2.75492				17.7758	12.1086	-2.66488	17.8122	12.6996	-2.05419	17.7077	12.7539	-2.03074	NaN	NaN	NaN	17.4182	12.7522	-1.98992
1060	0.494	17.449	11.311	-3.69778	17.5898	12.138	-2.76737				17.7528	12.0869	-2.67187	17.7775	12.6603	-2.05979	17.6948	12.7294	-2.03219	NaN	NaN	NaN	17.4245	12.7356	-1.98507
1061	0.496	17.4549	11.3023	-3.70638	17.5866	12.1348	-2.77478				17.73	12.0652	-2.67884	17.8027	12.6582	-2.0661	17.7101	12.7125	-2.04011	NaN	NaN	NaN	17.4736	12.7687	-1.99852
1062	0.498	17.4275	11.2774	-3.71067	17.5854	12.1255	-2.78946				17.7599	12.0776	-2.69789	17.8065	12.6412	-2.07751	17.6898	12.6836	-2.03827	NaN	NaN	NaN	17.4778	12.7612	-2.00015
1063	0.5	17.4364	11.2709	-3.71742	17.584	12.1206	-2.79941				17.737	12.0559	-2.70483	17.8375	12.6527	-2.09074	17.736	12.682	-2.04939	NaN	NaN	NaN	17.4881	12.7423	-2.00395
1064	0.502	17.4371	11.2588	-3.72209	17.5714	12.1042	-2.8099				17.7152	12.0345	-2.72206	17.832	12.6268	-2.10118	17.787	12.7013	-2.06403	NaN	NaN	NaN	17.5026	12.7299	-2.01419
1065	0.504	17.4459	11.2526	-3.73206	17.5808	12.1089	-2.82182				17.715	12.0339	-2.72711	17.8257	12.6034	-2.10535	17.7831	12.6853	-2.06882	NaN	NaN	NaN	17.4692	12.7069	-2.01662
1066	0.506	17.4204	11.2296	-3.7341	17.5656	12.0915	-2.83483				17.7452	12.0474	-2.73608	17.8081	12.5748	-2.11248	17.797	12.6696	-2.07469	NaN	NaN	NaN	17.44	12.664	-2.01851
1067	0.508	17.4281	11.2225	-3.74445	17.5776	12.0951	-2.84347				17.7233	12.026	-2.75328	17.8073	12.565	-2.11943	17.8259	12.6749	-2.08401	NaN	NaN	NaN	17.5027	12.6962	-2.02447
1068	0.51	17.4303	11.2107	-3.75208	17.5681	12.0807	-2.85756				17.7243	12.0261	-2.7636	17.7987	12.5449	-2.12854	17.8088	12.6417	-2.08982	NaN	NaN	NaN	17.4853	12.6647	-2.02768
1069	0.512	17.4116	11.1936	-3.75579	17.5703	12.0797	-2.86635				17.7241	12.0255	-2.76866	17.8195	12.5492	-2.14692	17.7888	12.6018	-2.10428	NaN	NaN	NaN	17.5055	12.6553	-2.03435
1070	0.514	17.4169	11.1846	-3.76357	17.5711	12.071	-2.87998				17.7315	12.0174	-2.78453	17.8127	12.5246	-2.16437	17.8237	12.6166	-2.11339	NaN	NaN	NaN	17.5106	12.6295	-2.04462
1071	0.516	17.4245	11.1778	-3.76899	17.5597	12.0614	-2.88533				17.7325	12.0176	-2.79486	17.8201	12.5166	-2.17716	17.8285	12.6028	-2.1226	NaN	NaN	NaN	17.5181	12.6326	-2.04533
1072	0.518	17.4061	11.161	-3.77405	17.572	12.0681	-2.89761				17.7398	12.0093	-2.81073	17.8356	12.5161	-2.19092	17.8048	12.5673	-2.13012	NaN	NaN	NaN	17.5133	12.6071	-2.0547
1073	0.52	17.4153	11.1553	-3.78365	17.5567	12.049	-2.90741				17.7408	12.0095	-2.82107	17.8366	12.5047	-2.20618	17.8041	12.5642	-2.14017	NaN	NaN	NaN	17.5333	12.6221	-2.06182
1074	0.522	17.3964	11.1381	-3.78826	17.5608	12.0439	-2.91846				17.7178	11.9874	-2.8329	17.8442	12.4943	-2.21386	17.8179	12.5661	-2.14851	NaN	NaN	NaN	17.5311	12.5928	-2.07135
1075	0.524	17.4044	11.1313	-3.79839	17.5519	12.0358	-2.92517				17.7187	11.987	-2.8483	17.836	12.4742	-2.23013	17.8554	12.5757	-2.16433	NaN	NaN	NaN	17.5305	12.5872	-2.07621
1076	0.526	17.3827	11.1116	-3.8022	17.5367	12.017	-2.93867				17.7199	11.9878	-2.85358	17.7875	12.4334	-2.2401	17.8595	12.57	-2.17361	NaN	NaN	NaN	17.53	12.5759	-2.08613
1077	0.528	17.3926	11.1066	-3.81129	17.5463	12.0218	-2.94727				17.6959	11.9655	-2.85502	17.8274	12.4552	-2.26378	17.8451	12.5592	-2.18302	NaN	NaN	NaN	17.5548	12.5778	-2.09818
1078	0.53	17.3722	11.0881	-3.81617	17.5341	12.0039	-2.95453				17.7031	11.9573	-2.87087	17.8172	12.4391	-2.27678	17.8593	12.554	-2.19746	NaN	NaN	NaN	17.5433	12.5506	-2.10723
1079	0.532	17.3853	11.0859	-3.82602	17.5435	12.0077	-2.96835				17.703	11.9568	-2.87593	17.8173	12.4322	-2.29605	17.8634	12.5485	-2.2046	NaN	NaN	NaN	17.5255	12.5193	-2.11526
1080	0.534	17.3658	11.0679	-3.83313	17.5298	11.9913	-2.97603				17.7041	11.9575	-2.88121	17.839	12.4459	-2.31179	17.8634	12.5339	-2.21175	18.1305	12.5946	-2.23975	17.5299	12.51	-2.12838
1081	0.536	17.3776	11.065	-3.83929	17.5468	11.9961	-2.98963				17.6812	11.9355	-2.89292	17.8419	12.4419	-2.32739	17.8496	12.5184	-2.21987	18.1135	12.5615	-2.24848	17.5199	12.4894	-2.13692
1082	0.538	17.36	11.049	-3.84466	17.5283	11.9786	-2.99522				17.6822	11.9356	-2.90325	17.8164	12.4254	-2.34194	17.8117	12.4823	-2.22618	18.1063	12.5424	-2.25828	17.5128	12.4771	-2.14309
1083	0.54	17.3724	11.0461	-3.85519	17.5317	11.9698	-3.00867				17.6883	11.9267	-2.91382	17.8113	12.4164	-2.36063	17.8436	12.4989	-2.24268	18.0943	12.5194	-2.26455	17.5424	12.4787	-2.16315
1084	0.542	17.3565	11.0315	-3.86105	17.537	11.971	-3.02067				17.6605	11.9144	-2.9202	17.8114	12.4156	-2.37502	17.8406	12.4951	-2.25561	18.1085	12.5198	-2.27794	17.5262	12.4573	-2.16535
1085	0.544	17.3401	11.0164	-3.86712	17.5217	11.9503	-3.02943				17.7192	11.9395	-2.93847	17.7987	12.4138	-2.3901	17.8388	12.4871	-2.26884	18.1228	12.5199	-2.2853	17.5074	12.4417	-2.17241
1086	0.546	17.3534	11.0143	-3.878	17.536	11.9572	-3.03855				17.6726	11.8965	-2.94131	17.8235	12.4247	-2.40618	17.837	12.4794	-2.27951	18.1128	12.5092	-2.30323	17.5184	12.4397	-2.19056
1087	0.548	17.3369	10.9989	-3.88713	17.5239	11.9411	-3.04884				17.6974	11.9182	-2.9554	17.8073	12.4169	-2.4218	17.8399	12.4825	-2.29564	18.0842	12.4805	-2.3079	17.5438	12.4491	-2.20424
1088	0.55	17.3209	10.9841	-3.89382	17.5227	11.9289	-3.06161				17.7035	11.9093	-2.96598	17.785	12.4118	-2.4347	17.8088	12.4613	-2.30143	18.1048	12.4914	-2.32411	17.5427	12.4392	-2.20905
1089	0.552	17.3323	10.9805	-3.90448	17.5309	11.9311	-3.07205				17.6807	11.8879	-2.97253	17.8137	12.4265	-2.45034	17.7916	12.4463	-2.30878	18.0651	12.4538	-2.33501	17.5387	12.4372	-2.22377
1090	0.554	17.3207	10.9693	-3.91222	17.5186	11.9181	-3.0775				17.6865	11.8783	-2.98813	17.7984	12.428	-2.46525	17.7996	12.4517	-2.33608	18.0737	12.4571	-2.35099	17.5761	12.4522	-2.23976
1091	0.556	17.3065	10.9563	-3.91999	17.5103	11.899	-3.09167				17.6873	11.8779	-3.00349	17.8032	12.4281	-2.4883	17.7872	12.4394	-2.34505	18.0883	12.462	-2.36915	17.5761	12.4426	-2.25583
1092	0.558	17.2935	10.9442	-3.92718	17.5131	11.8997	-3.09644				17.665	11.8577	-2.99993	17.8028	12.4298	-2.49859	17.7893	12.4463	-2.36264	18.0836	12.4574	-2.38205	17.5616	12.4334	-2.27147
1093	0.56	17.3092	10.9441	-3.93965	17.5208	11.8941	-3.10876				17.666	11.8579	-3.01026	17.7951	12.4354	-2.51641	17.7953	12.4487	-2.3848	18.0652	12.4461	-2.39517	17.5539	12.4253	-2.28166
1094	0.562	17.2958	10.9318	-3.94617	17.4993	11.8724	-3.11321				17.672	11.8489	-3.02081	17.783	12.42	-2.53325	17.8147	12.4637	-2.40589	18.0389	12.431	-2.41128	17.5898	12.458	-2.3054
1095	0.564	17.2863	10.9227	-3.95406	17.5251	11.883	-3.12891				17.6766	11.8386	-3.03108	17.7758	12.4209	-2.54486	17.8185	12.4698	-2.42556	18.0476	12.436	-2.43127	17.5683	12.4482	-2.31421
1096	0.566	17.2778	10.9145	-3.96226	17.5072	11.8636	-3.13448				17.6839	11.831	-3.04191	17.7961	12.4328	-2.5658	17.8075	12.462	-2.44444	18.0439	12.4379	-2.4544	17.5361	12.4244	-2.32388
1097	0.568	17.266	10.9032	-3.9722	17.5196	11.86	-3.1477				17.6612	11.8097	-3.04834	17.7844	12.429	-2.58403	17.8076	12.4662	-2.45906	18.0818	12.462	-2.47327	17.5653	12.4468	-2.3508
1098	0.57	17.2526	10.8907	-3.98019	17.5238	11.8616	-3.15079				17.6611	11.8091	-3.05337	17.7687	12.4303	-2.59578	17.8107	12.4743	-2.4769	18.0582	12.445	-2.49146	17.5545	12.4339	-2.37245
1099	0.572	17.2713	10.8933	-3.99322	17.5132	11.8436	-3.15917				17.6382	11.7873	-3.06478	17.792	12.4455	-2.61315	17.7852	12.4599	-2.49221	18.0451	12.4407	-2.50555	17.5307	12.4248	-2.379
1100	0.574	17.2623	10.8846	-4.00192	17.5131	11.8294	-3.17171				17.6678	11.7997	-3.07925	17.7626	12.4337	-2.62714	17.7738	12.4586	-2.50977	18.0237	12.4283	-2.52396	17.5174	12.4158	-2.40483
1101	0.576	17.2562	10.8784	-4.01169	17.4969	11.8116	-3.18064				17.6978	11.8127	-3.08873	17.7809	12.4467	-2.64806	17.7652	12.4547	-2.52415	18.0239	12.4321	-2.54694	17.5379	12.4317	-2.41851
1102	0.578	17.2459	10.8687	-4.01909	17.5043	11.8038	-3.19251				17.6751	11.792	-3.09007	17.7691	12.4435	-2.65595	17.7828	12.4736	-2.54365	18.0415	12.4477	-2.55828	17.519	12.4298	-2.42996
1103	0.58	17.2362	10.8592	-4.02951	17.4868	11.785	-3.19702				17.6523	11.7702	-3.10145	17.7479	12.4309	-2.67076	17.7838	12.479	-2.55505	18.0297	12.4476	-2.57843	17.4764	12.4106	-2.44325
1104	0.582	17.2334	10.8557	-4.04031	17.4805	11.7707	-3.20227				17.6856	11.7727	-3.11085	17.7751	12.4548	-2.69721	17.7716	12.4755	-2.57774	18.0256	12.4535	-2.59134	17.4843	12.425	-2.46782
1105	0.584	17.2513	10.8577	-4.05277	17.4921	11.7722	-3.21236				17.6355	11.7401	-3.11829	17.7464	12.444	-2.70603	17.7439	12.4618	-2.60056	18.018	12.4498	-2.60517	17.4794	12.4194	-2.48224
1106	0.586	17.2474	10.8535	-4.06218	17.4966	11.7668	-3.2234				17.6402	11.7303	-3.12349	17.7563	12.4547	-2.72609	17.7446	12.4615	-2.61568	18.0499	12.478	-2.62559	17.4923	12.4414	-2.49557
1107	0.588	17.2375	10.8441	-4.06961	17.4946	11.7548	-3.22886				17.6415	11.7316	-3.12377	17.7452	12.4519	-2.7392	17.7542	12.4684	-2.62712	18.0136	12.4566	-2.64256	17.4693	12.4182	-2.51193
1108	0.59	17.2279	10.8344	-4.08293	17.4822	11.7341	-3.23768				17.6247	11.7015	-3.14055	17.7557	12.463	-2.76143	17.7723	12.4852	-2.65158	18.0276	12.4687	-2.66346	17.5038	12.4366	-2.53108
1109	0.592	17.2216	10.8281	-4.09296	17.483	11.724	-3.24812				17.6011	11.6803	-3.13651	17.7906	12.4804	-2.78468	17.7466	12.4739	-2.66776	18.0077	12.4646	-2.68081	17.5046	12.4368	-2.53932
1110	0.594	17.208	10.8156	-4.09778	17.4808	11.7116	-3.25225				17.6306	11.6925	-3.15103	17.7683	12.4747	-2.80573	17.7253	12.4645	-2.68503	17.9985	12.4675	-2.69745	17.5346	12.4547	-2.57366
1111	0.596	17.206	10.8129	-4.10952	17.4764	11.7045	-3.25801				17.6315	11.6921	-3.16636	17.7598	12.4798	-2.8215	17.7371	12.4792	-2.71161	18.0135	12.4796	-2.72246	17.5194	12.4473	-2.58229
1112	0.598	17.1992	10.8061	-4.11911	17.4772	11.6941	-3.26664				17.6137	11.6629	-3.16272	17.7408	12.4636	-2.83531	17.7159	12.4687	-2.73213	17.9973	12.4765	-2.74621	17.5022	12.4441	-2.60656
1113	0.6	17.2164	10.808	-4.12693	17.489	11.6875	-3.28297				17.6421	11.6739	-3.17702	17.7183	12.4524	-2.85196	17.7191	12.4704	-2.74955	17.9678	12.4625	-2.76105	17.5322	12.4713	-2.6191
1114	0.602	17.211	10.8025	-4.1364	17.504	11.6903	-3.28673				17.624	11.6425	-3.19339	17.7175	12.459	-2.8697	17.7236	12.4837	-2.76746	17.989	12.4805	-2.78587	17.53	12.4743	-2.63816
1115	0.604	17.2022	10.794	-4.14441	17.4856	11.6696	-3.29504				17.6016	11.6222	-3.19458	17.7002	12.4506	-2.87667	17.7227	12.4831	-2.78445	17.985	12.4753	-2.80743	17.54	12.4851	-2.66216
1116	0.606	17.1961	10.7879	-4.15344	17.4814	11.6554	-3.3				17.5792	11.6019	-3.19575	17.7156	12.4572	-2.90877	17.6913	12.4683	-2.80718	17.9894	12.4931	-2.83117	17.5121	12.4654	-2.68195
1117	0.608	17.1929	10.7837	-4.16905	17.4591	11.624	-3.30795				17.6133	11.6052	-3.20547	17.7244	12.473	-2.92391	17.6933	12.4686	-2.82997	17.966	12.483	-2.8482	17.5095	12.4636	-2.71336
1118	0.61	17.1839	10.775	-4.17842	17.4592	11.6139	-3.31539				17.6379	11.6258	-3.22494	17.7107	12.4638	-2.94992	17.6989	12.4721	-2.8485	17.9684	12.485	-2.87081	17.4744	12.4507	-2.72968
1119	0.612	17.1776	10.7688	-4.18754	17.4712	11.6128	-3.32729				17.6424	11.6155	-3.2351	17.6987	12.4508	-2.97183	17.6914	12.4673	-2.87413	17.9445	12.4735	-2.89807	17.4917	12.4654	-2.75791
1120	0.614	17.1709	10.7621	-4.19718	17.464	11.5958	-3.3321				17.6257	11.5861	-3.24667	17.705	12.458	-2.99571	17.7029	12.4834	-2.89569	17.9533	12.4806	-2.9247	17.4509	12.4397	-2.76665
1121	0.616	17.1605	10.7523	-4.20497	17.4645	11.5911	-3.3378				17.6021	11.5652	-3.24248	17.6959	12.4536	-3.01519	17.6916	12.4786	-2.90959	17.9634	12.488	-2.94216	17.4726	12.4587	-2.7943
1122	0.618	17.1553	10.747	-4.21264	17.4607	11.5759	-3.34494				17.6077	11.5555	-3.25789	17.6996	12.4526	-3.03846	17.6822	12.4736	-2.92732	17.9405	12.4787	-2.96629	17.4423	12.4413	-2.82731
1123	0.62	17.1423	10.7347	-4.22436	17.4707	11.5748	-3.34898				17.5853	11.5353	-3.25898	17.7131	12.4579	-3.06429	17.6681	12.4671	-2.95575	17.947	12.4833	-2.99064	17.4624	12.4598	-2.84137
1124	0.622	17.1101	10.7183	-4.23215	17.4546	11.5548	-3.35544				17.5675	11.5054	-3.26518	17.7303	12.4698	-3.08673	17.6454	12.4568	-2.97169	17.917	12.4678	-3.01276	17.4579	12.4545	-2.85432
1125	0.624	17.1258	10.7185	-4.24247	17.4517	11.5406	-3.36006				17.5918	11.5258	-3.28465	17.728	12.4696	-3.101	17.6629	12.4642	-3.0025	17.912	12.4616	-3.03325	17.474	12.4683	-2.87997
1126	0.626	17.0947	10.7035	-4.24678	17.4443	11.5222	-3.36734				17.6529	11.5394	-3.29856	17.6699	12.4122	-3.12653	17.6579	12.4611	-3.02788	17.9095	12.4596	-3.0532	17.4486	12.4566	-2.89963
1127	0.628	17.1149	10.7074	-4.26137	17.4394	11.5056	-3.37798				17.6033	11.5082	-3.3005	17.6884	12.422	-3.15639	17.6342	12.4497	-3.04584	17.9192	12.4648	-3.08175	17.4474	12.4566	-2.9288
1128	0.63	17.0805	10.689	-4.26782	17.4508	11.5041	-3.38476				17.6069	11.4983	-3.29533	17.6893	12.4311	-3.16002	17.6294	12.4473	-3.06425	17.9062	12.4652	-3.10445	17.4281	12.4485	-2.93666
1129	0.632	17.0704	10.6795	-4.27505	17.4413	11.4843	-3.39258				17.6136	11.4904	-3.30604	17.7003	12.44	-3.18372	17.6155	12.4288	-3.0873	17.8998	12.4552	-3.1296	17.4415	12.4592	-2.96759
1130	0.634	17.0647	10.6736	-4.28531	17.44	11.4705	-3.40166				17.5946	11.4594	-3.31185	17.7216	12.4419	-3.20115	17.631	12.4351	-3.10656	17.8974	12.4525	-3.1495	17.4306	12.4465	-2.98566
1131	0.636	17.0548	10.6643	-4.29269	17.4583	11.474	-3.40946				17.5956	11.4595	-3.32211	17.6877	12.4098	-3.23696	17.6327	12.4333	-3.12908	17.8862	12.4414	-3.17129	17.4301	12.4459	-3.00081
1132	0.638	17.046	10.6553	-4.30616	17.4517	11.4554	-3.41737				17.6069	11.4418	-3.33791	17.6845	12.3972	-3.2495	17.6673	12.4523	-3.15364	NaN	NaN	NaN	17.4204	12.4337	-3.01736
1133	0.64	17.0584	10.6525	-4.32044	17.4352	11.4351	-3.42009				17.5599	11.4004	-3.32927	17.6605	12.3787	-3.26835	17.6493	12.4318	-3.16773	NaN	NaN	NaN	NaN	NaN	NaN
1134	0.642	17.0509	10.6452	-4.32749	17.4527	11.4379	-3.42753				17.5609	11.4	-3.34448	17.6343	12.35	-3.28011	17.6404	12.4197	-3.18276	NaN	NaN	NaN	NaN	NaN	NaN
1135	0.644	17.0405	10.6355	-4.3344	17.4317	11.4071	-3.43524				17.5945	11.4028	-3.35431	17.6403	12.3483	-3.30375	17.6235	12.4036	-3.1942	NaN	NaN	NaN	NaN	NaN	NaN
1136	0.646	17.0331	10.6276	-4.34802	17.4445	11.4063	-3.44427				17.5755	11.372	-3.35999	NaN	NaN	NaN	17.624	12.4036	-3.21166	NaN	NaN	NaN	NaN	NaN	NaN
1137	0.648	17.0217	10.6171	-4.35414	17.4369	11.3881	-3.44766				17.6045	11.3834	-3.37471	NaN	NaN	NaN	17.5995	12.3773	-3.25052	NaN	NaN	NaN	NaN	NaN	NaN
1138	0.65	17.0137	10.6093	-4.36277	17.4187	11.3663	-3.45341				17.582	11.3629	-3.38058	NaN	NaN	NaN	17.6373	12.4091	-3.26653	NaN	NaN	NaN	NaN	NaN	NaN
1139	0.652	17.0019	10.5984	-4.36951	17.4261	11.3617	-3.46209				17.5641	11.3332	-3.38652	NaN	NaN	NaN	17.6711	12.4282	-3.29547	NaN	NaN	NaN	NaN	NaN	NaN
1140	0.654	17.0189	10.599	-4.388	17.4219	11.3472	-3.46656				17.5462	11.3037	-3.39245	NaN	NaN	NaN				NaN	NaN	NaN	NaN	NaN	NaN
1141	0.656	17.0117	10.592	-4.39562	17.4187	11.3335	-3.47413				17.5751	11.3155	-3.40222	NaN	NaN	NaN				NaN	NaN	NaN	NaN	NaN	NaN
1142	0.658	16.9988	10.5804	-4.40225	17.4257	11.3292	-3.48095				17.5795	11.3058	-3.40725	NaN	NaN	NaN				NaN	NaN	NaN	NaN	NaN	NaN
1143	0.66	16.9897	10.5716	-4.40896	17.4221	11.3151	-3.49167				17.585	11.2966	-3.41757	NaN	NaN	NaN				NaN	NaN	NaN	NaN	NaN	NaN
1144	0.662	16.976	10.5588	-4.41677	17.3924	11.2781	-3.49368				17.5625	11.2757	-3.42829	NaN	NaN	NaN				NaN	NaN	NaN	NaN	NaN	NaN
1145	0.664	16.9891	10.5568	-4.42844	17.3949	11.275	-3.50037				17.5446	11.2462	-3.43413	NaN	NaN	NaN				NaN	NaN	NaN	NaN	NaN	NaN
1146	0.666	16.9762	10.5449	-4.43487	17.3856	11.2558	-3.50979				17.6013	11.2691	-3.4485	NaN	NaN	NaN				NaN	NaN	NaN	NaN	NaN	NaN
1147	0.668	16.964	10.5342	-4.43738	17.3814	11.2419	-3.5151				17.6066	11.2594	-3.46375	NaN	NaN	NaN				NaN	NaN	NaN	NaN	NaN	NaN
1148	0.67	16.9472	10.519	-4.44132	17.3861	11.2312	-3.52561				17.5608	11.2187	-3.46496	NaN	NaN	NaN				NaN	NaN	NaN	NaN	NaN	NaN
1149	0.672	16.9512	10.5094	-4.44591	17.3719	11.2139	-3.53199				17.5151	11.1783	-3.46616	NaN	NaN	NaN				NaN	NaN	NaN	NaN	NaN	NaN
1150	0.674	16.935	10.4948	-4.44963	17.382	11.2137	-3.53661				17.5482	11.1801	-3.48098	NaN	NaN	NaN				NaN	NaN	NaN	NaN	NaN	NaN
1151	0.676	16.8926	10.4705	-4.44552	17.3884	11.2049	-3.54862				17.5491	11.1807	-3.48625	NaN	NaN	NaN				NaN	NaN	NaN	NaN	NaN	NaN
1152	0.678	16.8842	10.4567	-4.45364	17.3711	11.1853	-3.55439				17.5312	11.1513	-3.49196	NaN	NaN	NaN				NaN	NaN	NaN	NaN	NaN	NaN
1153	0.68	16.8849	10.4503	-4.46384	17.3664	11.172	-3.56303				17.5321	11.1513	-3.50215	NaN	NaN	NaN				NaN	NaN	NaN	NaN	NaN	NaN
1154	0.682	16.8589	10.4264	-4.46894	17.3603	11.1581	-3.5727				17.5364	11.1411	-3.51203	NaN	NaN	NaN				NaN	NaN	NaN	NaN	NaN	NaN
1155	0.684	16.8886	10.4394	-4.48496	17.3552	11.1447	-3.57932				17.5374	11.1411	-3.52222	NaN	NaN	NaN				NaN	NaN	NaN	NaN	NaN	NaN
1156	0.686	16.8591	10.4096	-4.48683	17.3509	11.1327	-3.589				17.5204	11.1124	-3.53314	NaN	NaN	NaN				NaN	NaN	NaN	NaN	NaN	NaN
1157	0.688	16.9195	10.4529	-4.5179	17.3457	11.1198	-3.59863				17.5015	11.0826	-3.53348	NaN	NaN	NaN				NaN	NaN	NaN	NaN	NaN	NaN
1158	0.69	16.9075	10.4383	-4.52073	17.3401	11.1066	-3.60444				17.53	11.0934	-3.54829	NaN	NaN	NaN				NaN	NaN	NaN	NaN	NaN	NaN
1159	0.692	16.9018	10.4266	-4.52933	17.3344	11.0935	-3.61449				17.4846	11.054	-3.54434	NaN	NaN	NaN				NaN	NaN	NaN	NaN	NaN	NaN
1160	0.694	16.8965	10.4164	-4.53945	17.3427	11.0933	-3.61822				17.513	11.0642	-3.56405	NaN	NaN	NaN				NaN	NaN	NaN	NaN	NaN	NaN
1161	0.696	16.8739	10.3963	-4.53747	17.3363	11.0801	-3.6288				17.4908	11.0443	-3.56957	NaN	NaN	NaN				NaN	NaN	NaN	NaN	NaN	NaN
1162	0.698	16.8755	10.3848	-4.54919	17.3253	11.0629	-3.63335				17.496	11.0356	-3.57485	NaN	NaN	NaN				NaN	NaN	NaN	NaN	NaN	NaN
1163	0.7	16.8649	10.3744	-4.55763	17.3238	11.0494	-3.64908				17.5012	11.0264	-3.58503	NaN	NaN	NaN				NaN	NaN	NaN	NaN	NaN	NaN
1164	0.702	16.8548	10.3531	-4.56445	17.3171	11.0366	-3.66077				17.5064	11.0167	-3.6001	NaN	NaN	NaN				NaN	NaN	NaN	NaN	NaN	NaN
1165	0.704	16.8346	10.3347	-4.56551	17.313	11.0262	-3.66757				17.4611	10.9775	-3.59599	NaN	NaN	NaN				NaN	NaN	NaN	NaN	NaN	NaN
1166	0.706	16.8524	10.3375	-4.57641	17.3213	11.0266	-3.67833				17.4893	10.9871	-3.6206	NaN	NaN	NaN				NaN	NaN	NaN	NaN	NaN	NaN
1167	0.708	16.8283	10.3154	-4.58141	17.3125	11.0122	-3.68323				17.5177	10.9983	-3.63061	NaN	NaN	NaN				NaN	NaN	NaN	NaN	NaN	NaN
1168	0.71	16.8218	10.2975	-4.58352	17.2985	10.9941	-3.69328				17.4724	10.9581	-3.63617	NaN	NaN	NaN				NaN	NaN	NaN	NaN	NaN	NaN
1169	0.712	16.8157	10.2911	-4.59185	17.2904	10.9813	-3.70502				17.4997	10.9687	-3.64091	NaN	NaN	NaN				NaN	NaN	NaN	NaN	NaN	NaN
1170	0.714	16.8145	10.2776	-4.59993	17.3035	10.986	-3.71211				17.4554	10.9297	-3.64682	NaN	NaN	NaN				NaN	NaN	NaN	NaN	NaN	NaN
1171	0.716	16.7942	10.2553	-4.60083	17.2904	10.9696	-3.72111				17.4333	10.9089	-3.66192	NaN	NaN	NaN				NaN	NaN	NaN	NaN	NaN	NaN
1172	0.718	16.7999	10.2516	-4.60976	17.2854	10.9562	-3.7335				17.4384	10.9002	-3.66716	NaN	NaN	NaN				NaN	NaN	NaN	NaN	NaN	NaN
1173	0.72	16.7697	10.2247	-4.60946	17.2719	10.9392	-3.74331				17.4394	10.9002	-3.67729	NaN	NaN	NaN				NaN	NaN	NaN	NaN	NaN	NaN
1174	0.722	16.7735	10.2142	-4.6153	17.2627	10.9271	-3.75178				17.4173	10.8806	-3.68261	NaN	NaN	NaN				NaN	NaN	NaN	NaN	NaN	NaN
1175	0.724	16.7681	10.2024	-4.62373	17.2691	10.9269	-3.75758				17.4224	10.8708	-3.69755	NaN	NaN	NaN				NaN	NaN	NaN	NaN	NaN	NaN
1176	0.726	16.7513	10.1792	-4.6284	17.2532	10.9081	-3.77003				17.4284	10.8622	-3.7129	NaN	NaN	NaN				NaN	NaN	NaN	NaN	NaN	NaN
1177	0.728	16.7532	10.1707	-4.63619	17.2537	10.8999	-3.78012				17.4565	10.872	-3.7327	NaN	NaN	NaN				NaN	NaN	NaN	NaN	NaN	NaN
1178	0.73	16.7499	10.1579	-4.64226	17.2593	10.9004	-3.78452				17.4344	10.8524	-3.73795	NaN	NaN	NaN				NaN	NaN	NaN	NaN	NaN	NaN
1179	0.732	16.7409	10.1417	-4.64314	17.247	10.8843	-3.79944				17.4165	10.8237	-3.74315	NaN	NaN	NaN				NaN	NaN	NaN	NaN	NaN	NaN
1180	0.734	16.7356	10.1271	-4.65504	17.2379	10.8711	-3.80741				17.4445	10.834	-3.75811	NaN	NaN	NaN				NaN	NaN	NaN	NaN	NaN	NaN
1181	0.736	16.7563	10.1352	-4.6735	17.2182	10.8501	-3.81579				17.4225	10.8144	-3.76332	NaN	NaN	NaN				NaN	NaN	NaN	NaN	NaN	NaN
1182	0.738	16.7531	10.1236	-4.67564	17.2291	10.8546	-3.8273				17.4005	10.7949	-3.76851	NaN	NaN	NaN				NaN	NaN	NaN	NaN	NaN	NaN
1183	0.74	16.7383	10.1014	-4.67851	17.2198	10.8399	-3.8348				17.3517	10.7647	-3.77365	NaN	NaN	NaN				NaN	NaN	NaN	NaN	NaN	NaN
1184	0.742	16.741	10.0937	-4.68991	17.2048	10.8232	-3.847				17.3795	10.7749	-3.7886	NaN	NaN	NaN				NaN	NaN	NaN	NaN	NaN	NaN
1185	0.744	16.7495	10.0902	-4.69915	17.1885	10.8054	-3.85865				17.3618	10.7464	-3.79368	NaN	NaN	NaN				NaN	NaN	NaN	NaN	NaN	NaN
1186	0.746	16.732	10.0646	-4.70238	17.1982	10.8085	-3.86927				17.3627	10.7463	-3.80376	NaN	NaN	NaN				NaN	NaN	NaN	NaN	NaN	NaN
1187	0.748	16.7205	10.0465	-4.70138	17.1833	10.7917	-3.87862				17.3409	10.727	-3.80887	NaN	NaN	NaN				NaN	NaN	NaN	NaN	NaN	NaN
1188	0.75	16.7043	10.0245	-4.69998	17.1886	10.7933	-3.88682				17.3695	10.7376	-3.82911	NaN	NaN	NaN				NaN	NaN	NaN	NaN	NaN	NaN
1189	0.752	16.7045	10.0146	-4.71222	17.1711	10.7756	-3.89494				17.3736	10.7279	-3.83386	NaN	NaN	NaN				NaN	NaN	NaN	NaN	NaN	NaN
1190	0.754	16.6878	9.99133	-4.72401	17.1796	10.778	-3.90807				17.3517	10.708	-3.84374	NaN	NaN	NaN				NaN	NaN	NaN	NaN	NaN	NaN
1191	0.756	16.6553	9.95571	-4.73023	17.1651	10.7619	-3.917				17.3257	10.6972	-3.85366	NaN	NaN	NaN				NaN	NaN	NaN	NaN	NaN	NaN
1192	0.758	16.624	9.92149	-4.72916	17.1706	10.7629	-3.92716				17.3317	10.6886	-3.86892	NaN	NaN	NaN				NaN	NaN	NaN	NaN	NaN	NaN
1193	0.76	16.6492	9.93991	-4.7349	17.1556	10.7465	-3.93463				17.3099	10.6688	-3.87871	NaN	NaN	NaN				NaN	NaN	NaN	NaN	NaN	NaN
1194	0.762	16.6534	9.92995	-4.74379	17.1404	10.7286	-3.94723				17.3376	10.6794	-3.88896	NaN	NaN	NaN				NaN	NaN	NaN	NaN	NaN	NaN
1195	0.764	16.6516	9.92026	-4.74522	17.1451	10.7298	-3.95627				17.3158	10.6596	-3.89873	NaN	NaN	NaN				NaN	NaN	NaN	NaN	NaN	NaN
1196	0.766	16.644	9.90744	-4.74838	17.1286	10.7131	-3.96519				17.2941	10.6404	-3.9037	NaN	NaN	NaN				NaN	NaN	NaN	NaN	NaN	NaN
1197	0.768	16.6463	9.89951	-4.75854	17.117	10.6975	-3.97696				17.2724	10.6207	-3.91341	NaN	NaN	NaN				NaN	NaN	NaN	NaN	NaN	NaN
1198	0.77	16.6496	9.88919	-4.76414	17.1227	10.6989	-3.98754				17.2508	10.6016	-3.91835	NaN	NaN	NaN				NaN	NaN	NaN	NaN	NaN	NaN
1199	0.772	16.6296	9.87086	-4.76378	17.108	10.6841	-3.99743				17.2519	10.6028	-3.91884	NaN	NaN	NaN				NaN	NaN	NaN	NaN	NaN	NaN
1200	0.774	16.6275	9.85744	-4.77318	17.1084	10.6818	-4.00673				17.2801	10.612	-3.9487	NaN	NaN	NaN				NaN	NaN	NaN	NaN	NaN	NaN
1201	0.776	16.6143	9.84325	-4.77712	17.0967	10.6672	-4.01689				17.2586	10.5935	-3.94881	NaN	NaN	NaN				NaN	NaN	NaN	NaN	NaN	NaN
1202	0.778	16.5929	9.8175	-4.77621	17.0791	10.6486	-4.02546				17.237	10.5739	-3.95845	NaN	NaN	NaN				NaN	NaN	NaN	NaN	NaN	NaN
1203	0.78	16.5725	9.79797	-4.78133	17.0839	10.6504	-4.03124				17.2379	10.5739	-3.96847	NaN	NaN	NaN				NaN	NaN	NaN	NaN	NaN	NaN
1204	0.782	16.5523	9.76928	-4.78723	17.0676	10.6325	-4.04257				17.2165	10.5549	-3.97331	17.5606	11.1661	-3.48179				NaN	NaN	NaN	NaN	NaN	NaN
1205	0.784	16.5485	9.75307	-4.78929	17.0748	10.6359	-4.04828				17.1949	10.5354	-3.98289	17.5509	11.1485	-3.49745				NaN	NaN	NaN	NaN	NaN	NaN
1206	0.786	16.5635	9.76388	-4.79878	17.0511	10.6157	-4.05641				17.2222	10.5451	-3.99796	17.5386	11.1195	-3.4969				NaN	NaN	NaN	NaN	NaN	NaN
1207	0.788	16.5238	9.71974	-4.78878	17.0558	10.6172	-4.06434				17.224	10.545	-4.01799	17.5355	11.1111	-3.50187				NaN	NaN	NaN	NaN	NaN	NaN
1208	0.79	16.5074	9.70389	-4.78654	17.0472	10.6034	-4.07297				17.2025	10.5261	-4.02276	17.5682	11.1175	-3.52213				NaN	NaN	NaN	NaN	NaN	NaN
1209	0.792	16.4976	9.68949	-4.79335	17.0241	10.5843	-4.082				17.1812	10.5078	-4.02278	17.6089	11.1287	-3.5346				NaN	NaN	NaN	NaN	NaN	NaN
1210	0.794	16.4859	9.67357	-4.79729	17.0308	10.5857	-4.08838				17.1549	10.4969	-4.02714	17.5826	11.1025	-3.54026				NaN	NaN	NaN	NaN	NaN	NaN
1211	0.796	16.4622	9.64865	-4.79937	17.0148	10.5702	-4.10299				17.1839	10.5082	-4.048	17.5752	11.0896	-3.55431				NaN	NaN	NaN	NaN	NaN	NaN
1212	0.798	16.4541	9.63631	-4.80334	17.0145	10.5675	-4.11575				17.1617	10.4889	-4.04749	17.5767	11.0779	-3.55701				NaN	NaN	NaN	NaN	NaN	NaN
1213	0.8	16.4587	9.63514	-4.80963	16.9946	10.5492	-4.12375				17.1656	10.4792	-4.0521	17.5928	11.0696	-3.57365				NaN	NaN	NaN	NaN	NaN	NaN
1214	0.802	16.4709	9.63977	-4.82469	16.9978	10.55	-4.13257				17.1413	10.47	-4.06217	17.5552	11.0392	-3.57629				NaN	NaN	NaN	NaN	NaN	NaN
1215	0.804	16.4592	9.62511	-4.83095	16.98	10.5324	-4.14172				17.12	10.4513	-4.06686	17.5629	11.0473	-3.58977				NaN	NaN	NaN	NaN	NaN	NaN
1216	0.806	16.4396	9.60918	-4.83084	16.9904	10.5351	-4.15165				17.147	10.4603	-4.08672	17.5394	11.021	-3.59785				NaN	NaN	NaN	NaN	NaN	NaN
1217	0.808	16.4414	9.59825	-4.84394	16.9738	10.517	-4.15956				17.1257	10.4416	-4.09138	17.5402	10.9937	-3.62213				NaN	NaN	NaN	NaN	NaN	NaN
1218	0.81	16.4293	9.58455	-4.84326	16.9685	10.5084	-4.17202				17.1266	10.4415	-4.10134	17.5046	10.9676	-3.62645				NaN	NaN	NaN	NaN	NaN	NaN
1219	0.812	16.435	9.58387	-4.85563	16.9612	10.5027	-4.17828				17.1063	10.4233	-4.1112	17.5188	10.9765	-3.636				NaN	NaN	NaN	NaN	NaN	NaN
1220	0.814	16.4242	9.57012	-4.86117	16.9578	10.4926	-4.18755				17.1333	10.4323	-4.13111	17.5025	10.9612	-3.65067				NaN	NaN	NaN	NaN	NaN	NaN
1221	0.816	16.409	9.55656	-4.86377	16.9607	10.4913	-4.19756				17.0861	10.4046	-4.12575	17.501	10.9512	-3.66171				NaN	NaN	NaN	NaN	NaN	NaN
1222	0.818	16.4143	9.54847	-4.87444	16.9482	10.476	-4.2084				17.087	10.404	-4.14043	17.479	10.9332	-3.67723				NaN	NaN	NaN	NaN	NaN	NaN
1223	0.82	16.395	9.53326	-4.87492	16.9444	10.4622	-4.22394				17.0659	10.3849	-4.1497	17.4181	10.8903	-3.6803				NaN	NaN	NaN	NaN	NaN	NaN
1224	0.822	16.3925	9.5283	-4.88594	16.9309	10.4467	-4.23467				17.0409	10.3754	-4.15441	17.4458	10.9019	-3.70613				NaN	NaN	NaN	NaN	NaN	NaN
1225	0.824	16.3555	9.49763	-4.88949	16.9267	10.4428	-4.23987				17.0238	10.3479	-4.15877	17.4452	10.9053	-3.72023				NaN	NaN	NaN	NaN	NaN	NaN
1226	0.826	16.3579	9.48688	-4.90179	16.9203	10.4338	-4.24801				17.0247	10.3478	-4.16869	17.4432	10.8978	-3.72842				17.6871	10.9415	-3.70791	NaN	NaN	NaN
1227	0.828	16.3144	9.45331	-4.88817	16.9283	10.4343	-4.2572				17.0295	10.3387	-4.17844	17.4295	10.8921	-3.74703	17.4463	10.9603	-3.61201	17.7147	10.9515	-3.72458	NaN	NaN	NaN
1228	0.83	16.3074	9.4444	-4.89368	16.9112	10.4158	-4.26274				17.0303	10.3381	-4.19305	17.4215	10.8836	-3.76409	17.4183	10.938	-3.62454	17.7111	10.9386	-3.73537	NaN	NaN	NaN
1229	0.832	16.2963	9.4331	-4.8979	16.9017	10.4034	-4.27397				17.0094	10.3202	-4.19284	17.3969	10.8683	-3.78001	17.4227	10.9391	-3.63769	17.6992	10.923	-3.74144	NaN	NaN	NaN
1230	0.834	16.2844	9.4208	-4.90463	16.8844	10.3854	-4.27827				16.9894	10.3018	-4.2072	17.418	10.8849	-3.80359	17.4261	10.9398	-3.64439	17.6909	10.9086	-3.74833	NaN	NaN	NaN
1231	0.836	16.267	9.40885	-4.90791	16.8918	10.3849	-4.2901				16.9941	10.2927	-4.21692	17.4073	10.8801	-3.81049	17.4518	10.9496	-3.66331	17.6794	10.8928	-3.75669	NaN	NaN	NaN
1232	0.838	16.2667	9.40201	-4.91776	16.8807	10.3721	-4.30101				16.995	10.2932	-4.22213	17.3723	10.8641	-3.82094	17.4596	10.9518	-3.67832	17.6636	10.8755	-3.7637	NaN	NaN	NaN
1233	0.84	16.259	9.39277	-4.92584	16.8693	10.3592	-4.30734				16.9997	10.2841	-4.23184	17.378	10.8698	-3.84222	17.4683	10.9543	-3.70105	17.6684	10.8768	-3.77513	17.2598	10.9693	-3.57503
1234	0.842	16.2479	9.38173	-4.93084	16.8501	10.3396	-4.31132				16.9787	10.2662	-4.23153	17.3644	10.8621	-3.85458	17.4708	10.9553	-3.71521	17.671	10.8772	-3.7881	17.2531	10.9673	-3.59314
1235	0.844	16.2411	9.37388	-4.94212	16.8343	10.3225	-4.32076				17.0053	10.2744	-4.25615	17.3736	10.8736	-3.87488	17.4656	10.9492	-3.73347	17.6294	10.8499	-3.79733	17.2628	10.9698	-3.6043
1236	0.846	16.2299	9.36293	-4.94808	16.8413	10.3246	-4.32769				16.9589	10.2469	-4.2552	17.3507	10.86	-3.89031	17.4583	10.9479	-3.74946	17.636	10.8516	-3.81286	17.2748	10.9778	-3.61877
1237	0.848	16.2174	9.35115	-4.955	16.8315	10.3127	-4.33628				16.9597	10.2473	-4.26039	17.3662	10.8799	-3.90406	17.4338	10.9369	-3.75983	17.6291	10.8483	-3.83018	17.2689	10.9736	-3.64322
1238	0.85	16.2072	9.34159	-4.96264	16.8221	10.3001	-4.34233				16.9891	10.2465	-4.2749	17.3406	10.8587	-3.92142	17.4255	10.9326	-3.77575	17.6344	10.8496	-3.85164	17.24	10.9627	-3.65237
1239	0.852	16.1968	9.33236	-4.97128	16.8078	10.2785	-4.35429				16.9691	10.2292	-4.27975	17.3189	10.8568	-3.93296	17.4303	10.9354	-3.79218	17.6106	10.8396	-3.86153	17.22	10.9501	-3.66917
1240	0.854	16.1894	9.32521	-4.97874	16.7903	10.2624	-4.35782				16.9481	10.2114	-4.27937	17.325	10.8605	-3.95216	17.4255	10.9326	-3.81552	17.6045	10.8366	-3.87991	17.2133	10.9466	-3.69129
1241	0.856	16.1787	9.31552	-4.9853	16.8068	10.2666	-4.36677				16.9483	10.2105	-4.28876	17.2999	10.8498	-3.9702	17.4044	10.9258	-3.8302	17.5925	10.8313	-3.89751	17.2056	10.9465	-3.71196
1242	0.858	16.164	9.30221	-4.99387	16.7736	10.237	-4.36977				16.9538	10.2018	-4.30361	17.3081	10.863	-3.98954	17.4005	10.9305	-3.84662	17.5837	10.8273	-3.91665	17.2221	10.9619	-3.72903
1243	0.86	16.1573	9.29586	-5.00431	16.792	10.2421	-4.38059				16.9331	10.1832	-4.31258	17.2975	10.8602	-4.00351	17.4006	10.9315	-3.86731	17.5696	10.821	-3.93517	17.2162	10.959	-3.75576
1244	0.862	16.1517	9.29018	-5.01307	16.7834	10.2284	-4.39095				16.9369	10.1737	-4.31702	17.2873	10.8599	-4.02284	17.3783	10.9234	-3.88202	17.5564	10.8153	-3.95261	17.1815	10.9379	-3.76671
1245	0.864	16.1414	9.28169	-5.02254	16.7782	10.2178	-4.39637				16.8909	10.1465	-4.31592	17.2666	10.8535	-4.03492	17.3661	10.9165	-3.89764	17.5579	10.8255	-3.96904	17.1697	10.9392	-3.77834
1246	0.866	16.1351	9.2765	-5.03161	16.7723	10.2056	-4.40759				16.9179	10.1559	-4.33632	17.2814	10.8647	-4.05617	17.3739	10.9294	-3.91927	17.5418	10.8188	-3.9848	17.1959	10.9586	-3.80172
1247	0.868	16.1217	9.26493	-5.03792	16.7654	10.1893	-4.41389				16.8749	10.1195	-4.32977	17.259	10.8513	-4.07346	17.3322	10.9025	-3.92634	17.5362	10.8158	-4.00441	17.1655	10.9388	-3.81613
1248	0.87	16.1135	9.25859	-5.04807	16.7698	10.1905	-4.42534				16.8795	10.1105	-4.33936	17.2782	10.869	-4.09513	17.3421	10.9168	-3.95415	17.5341	10.8252	-4.02532	17.1448	10.9276	-3.83408
1249	0.872	16.0921	9.24778	-5.05247	16.7582	10.1702	-4.42998				16.8812	10.1108	-4.35436	17.2737	10.8664	-4.10808	17.3048	10.891	-3.96322	17.5175	10.8179	-4.04257	17.1507	10.9344	-3.85703
1250	0.874	16.0846	9.24054	-5.06322	16.7408	10.1521	-4.43558				16.8392	10.075	-4.35292	17.2686	10.8684	-4.12346	17.2842	10.8812	-3.98184	17.5073	10.8237	-4.06491	17.1066	10.9069	-3.86942
1251	0.876	16.085	9.23754	-5.07369	16.733	10.1383	-4.44026				16.8644	10.0829	-4.3676	17.2675	10.8738	-4.13873	17.3156	10.914	-4.01295	17.4854	10.8139	-4.08766	17.1425	10.9415	-3.90059
1252	0.878	16.0665	9.22371	-5.08068	16.7225	10.1221	-4.44773				16.8439	10.065	-4.37177	17.2557	10.8671	-4.15942	17.3056	10.9095	-4.02249	17.4715	10.8084	-4.10692	17.1323	10.9353	-3.9286
1253	0.88	16.0609	9.21902	-5.09004	16.7165	10.1087	-4.45258				16.8492	10.0569	-4.38184	17.2352	10.8586	-4.16721	17.2927	10.9151	-4.03697	17.4416	10.7954	-4.12073	17.1236	10.9388	-3.9465
1254	0.882	16.058	9.21469	-5.09958	16.7075	10.0939	-4.45995				16.8066	10.0209	-4.37519	17.232	10.8589	-4.19177	17.3085	10.9294	-4.05994	17.4502	10.8092	-4.14161	17.1011	10.9307	-3.957
1255	0.884	16.0513	9.20823	-5.11078	16.7148	10.0924	-4.46336				16.8076	10.0203	-4.38959	17.231	10.8637	-4.21392	17.302	10.9282	-4.08098	17.446	10.8069	-4.16441	17.1034	10.9387	-3.97794
1256	0.886	16.0164	9.18976	-5.11193	16.7014	10.0737	-4.47072				16.7873	10.002	-4.39832	17.2075	10.8545	-4.23129	17.2808	10.908	-4.09767	17.4282	10.8002	-4.17667	17.0957	10.9484	-3.99611
1257	0.888	16.0094	9.18289	-5.12292	16.6897	10.056	-4.4778				16.8166	10.0023	-4.40864	17.2067	10.8572	-4.2502	17.2503	10.8956	-4.11795	17.4465	10.8168	-4.20466	17.0914	10.9452	-4.02232
1258	0.89	15.9952	9.16845	-5.13125	16.6782	10.0396	-4.48096				16.7963	9.98403	-4.41734	17.1883	10.8466	-4.27297	17.2436	10.8921	-4.13099	17.4247	10.8077	-4.22161	17.0728	10.9341	-4.04757
1259	0.892	15.9895	9.16374	-5.13975	16.6644	10.0202	-4.48847				16.8007	9.97556	-4.42223	17.1643	10.8372	-4.28611	17.2415	10.8911	-4.15373	17.4107	10.8009	-4.25081	17.0612	10.9301	-4.06267
1260	0.894	15.984	9.15964	-5.15176	16.6531	10.0041	-4.49137				16.8017	9.97493	-4.43661	17.1546	10.8344	-4.30703	17.2212	10.881	-4.1799	17.3993	10.7956	-4.27141	17.029	10.9182	-4.07053
1261	0.896	15.9742	9.1517	-5.16003	16.658	10.0006	-4.49892				16.831	9.97514	-4.44696	17.1227	10.8125	-4.32137	17.2153	10.8791	-4.20322	17.3872	10.8013	-4.28815	17.0297	10.9188	-4.09654
1262	0.898	15.965	9.14471	-5.16683	16.6553	9.99113	-4.50354				16.7849	9.94837	-4.44038	17.1192	10.8132	-4.33895	17.188	10.8695	-4.21343	17.3792	10.7977	-4.30534	17.0318	10.9274	-4.11895
1263	0.9	15.9434	9.1335	-5.17503	16.6481	9.97783	-4.51079				16.7682	9.92187	-4.44413	17.1246	10.8194	-4.3545	17.1622	10.8571	-4.22159	17.3822	10.7977	-4.33566	17.0191	10.9214	-4.12941
1264	0.902	15.9351	9.12612	-5.18154	16.642	9.96552	-4.5167				16.7727	9.91288	-4.4536	17.131	10.8207	-4.37457	17.167	10.8683	-4.24953	17.3709	10.7922	-4.3588	17.0232	10.9275	-4.15253
1265	0.904	15.9341	9.12285	-5.19231	16.6279	9.95023	-4.51837				16.7524	9.89533	-4.4576	17.0763	10.7865	-4.38784	17.1482	10.86	-4.27061	17.3628	10.7884	-4.37756	17.0015	10.9177	-4.16545
1266	0.906	15.9244	9.11523	-5.20205	16.6262	9.93757	-4.5249				16.7569	9.88634	-4.46704	17.075	10.7914	-4.40587	17.1167	10.8362	-4.28216	17.3489	10.7814	-4.40954	16.9951	10.91	-4.18859
1267	0.908	15.9112	9.10508	-5.20955	16.5884	9.90254	-4.52742				16.7112	9.86048	-4.45587	17.035	10.7631	-4.41311	17.1157	10.836	-4.30648	17.3234	10.7714	-4.41987	16.9978	10.9171	-4.21305
1268	0.91	15.9116	9.10272	-5.21963	16.5946	9.90059	-4.53208				16.7163	9.85189	-4.47039	17.0229	10.7559	-4.43327	17.1082	10.8327	-4.32793	17.3155	10.7674	-4.44131	16.9855	10.9108	-4.23616
1269	0.912	15.9024	9.0942	-5.22769	16.5848	9.88485	-4.53945				16.7193	9.84215	-4.46956	17.0087	10.7472	-4.44357	17.0997	10.8276	-4.34446	17.3111	10.7649	-4.46336	16.9642	10.9011	-4.25067
1270	0.914	15.8728	9.07987	-5.23186	16.576	9.86928	-4.54213				16.7035	9.81631	-4.47834	16.9992	10.7447	-4.46338	17.0656	10.8035	-4.36049	17.2961	10.7581	-4.48217	16.9423	10.8971	-4.26885
1271	0.916	15.8726	9.07618	-5.24317	16.5749	9.85547	-4.55257				16.7035	9.8158	-4.48292	17.0385	10.7581	-4.50445	17.0682	10.8036	-4.38627	17.3086	10.7629	-4.49951	16.9203	10.8826	-4.28112
1272	0.918	15.8575	9.06527	-5.2488	16.5723	9.84942	-4.55733				16.6879	9.78898	-4.50078	17.0082	10.7328	-4.51427	17.0567	10.7982	-4.40518	17.2939	10.7562	-4.51935	16.8989	10.8564	-4.31472
1273	0.92	15.8514	9.05938	-5.25932	16.5597	9.83125	-4.55838				16.6712	9.76391	-4.49525	17.0087	10.7237	-4.53533	17.0513	10.7966	-4.42632	17.2846	10.7418	-4.53969	16.909	10.8724	-4.33848
1274	0.922	15.841	9.05118	-5.26484	16.5556	9.81503	-4.56814				16.6758	9.75394	-4.51372	16.9703	10.6892	-4.53965	17.0504	10.7941	-4.44586	NaN	NaN	NaN	16.9172	10.8738	-4.35688
1275	0.924	15.825	9.03812	-5.2715	16.5547	9.81078	-4.57408				16.6836	9.73617	-4.52275	16.942	10.6731	-4.55052	17.0263	10.7712	-4.46409	NaN	NaN	NaN	16.8968	10.863	-4.36824
1276	0.926	15.821	9.03156	-5.28153	16.5447	9.79141	-4.57882				16.7289	9.76157	-4.53404	16.9723	10.6904	-4.57469	17.0157	10.7666	-4.48102	NaN	NaN	NaN	16.8837	10.8544	-4.38271
1277	0.928	15.8164	9.02674	-5.29153	16.524	9.77178	-4.58157				16.6879	9.72721	-4.53208	16.9375	10.6643	-4.57858	17.0465	10.7922	-4.50508	NaN	NaN	NaN	16.8683	10.8391	-4.39914
1278	0.93	15.7865	9.0121	-5.29371	16.5084	9.75269	-4.58394				16.6922	9.71825	-4.54142	16.9285	10.6477	-4.59009	17.0639	10.805	-4.53606	NaN	NaN	NaN	16.8741	10.8426	-4.4174
1279	0.932	15.7779	9.00405	-5.30322	16.4956	9.73495	-4.58895				16.6966	9.70875	-4.55528	16.8584	10.5846	-4.60131	17.0737	10.8124	-4.55375	NaN	NaN	NaN	16.884	10.8459	-4.43318
1280	0.934	15.7655	8.99273	-5.31	16.4861	9.72545	-4.58911				16.7008	9.70032	-4.56006	16.8851	10.5936	-4.62285	17.0676	10.8056	-4.56853	NaN	NaN	NaN	16.8676	10.8384	-4.44402
1281	0.936	15.7589	8.98562	-5.32042	16.4783	9.71203	-4.59224				16.66	9.66569	-4.56256	16.8952	10.5887	-4.63814	17.0266	10.7677	-4.58358	NaN	NaN	NaN	16.8199	10.7987	-4.45361
1282	0.938	15.7529	8.97935	-5.32842	16.4648	9.6944	-4.60051				16.6635	9.65633	-4.56674	16.872	10.5722	-4.64553	17.017	10.7631	-4.59616	NaN	NaN	NaN	16.7885	10.7743	-4.45668
1283	0.94	15.7432	8.97056	-5.33715	16.4659	9.68347	-4.61185				16.647	9.62993	-4.57467	16.8647	10.554	-4.66495	16.9967	10.7438	-4.60952	NaN	NaN	NaN	16.7708	10.7589	-4.47203
1284	0.942	15.7287	8.95772	-5.34365	16.4498	9.66849	-4.61396				16.6478	9.63036	-4.5798	16.8773	10.552	-4.67096	16.9524	10.7024	-4.61747	NaN	NaN	NaN	16.7443	10.7409	-4.47778
1285	0.944	15.7174	8.94894	-5.35099	16.4425	9.65179	-4.62282				16.6073	9.59659	-4.57771	16.8451	10.5206	-4.67435	16.9659	10.7062	-4.63977	NaN	NaN	NaN	16.7052	10.7004	-4.49158
1286	0.946	15.7056	8.93866	-5.35608	16.4376	9.63874	-4.62842				16.6115	9.5882	-4.58245	16.858	10.5252	-4.69716	16.9375	10.6762	-4.64674	NaN	NaN	NaN	16.6685	10.6752	-4.49796
1287	0.948	15.6938	8.92835	-5.36043	16.4317	9.62714	-4.63745				16.5917	9.57131	-4.58619	16.8252	10.4914	-4.69305	16.8907	10.6395	-4.64776	NaN	NaN	NaN	16.6703	10.667	-4.5134
1288	0.95	15.6851	8.91922	-5.3694	16.4345	9.62418	-4.64416				16.5994	9.55312	-4.59955	16.826	10.4763	-4.69931	16.8995	10.6288	-4.67177	NaN	NaN	NaN	16.6355	10.635	-4.52447
1289	0.952	15.6658	8.90241	-5.37329	16.4262	9.61103	-4.65183				16.5558	9.52841	-4.59778	16.8273	10.4622	-4.70303	16.8466	10.5956	-4.67554	NaN	NaN	NaN	16.6357	10.6278	-4.53043
1290	0.954	15.6559	8.89336	-5.38131	16.4209	9.60005	-4.65766				16.56	9.51841	-4.61591	16.823	10.4456	-4.70527	16.8605	10.5882	-4.69718	NaN	NaN	NaN	16.6342	10.6113	-4.55757
1291	0.956	15.643	8.88203	-5.38601	16.414	9.58811	-4.66764				16.5403	9.50168	-4.61959	16.8745	10.4774	-4.71859	16.8455	10.5679	-4.70294	NaN	NaN	NaN	16.6092	10.5947	-4.56107
1292	0.958	15.6319	8.87222	-5.39114	16.4069	9.57434	-4.67365				16.5403	9.50168	-4.61959	16.8494	10.4428	-4.71995	16.8685	10.5692	-4.72052	NaN	NaN	NaN	16.6025	10.5817	-4.56637
1293	0.96	15.6198	8.86153	-5.39596	16.3944	9.55764	-4.68158				16.5683	9.50062	-4.63428	16.8704	10.4335	-4.72088	16.8497	10.5352	-4.72678	NaN	NaN	NaN	16.5897	10.557	-4.57019
1294	0.962	15.6473	8.86076	-5.41595	16.3791	9.54315	-4.68376				16.5487	9.48448	-4.63347	16.8509	10.4244	-4.71523	16.8476	10.5187	-4.7381	NaN	NaN	NaN	16.5959	10.5589	-4.58174
1295	0.964	15.6317	8.84706	-5.4222	16.3546	9.51494	-4.6886				16.5299	9.46765	-4.64665	16.9071	10.4428	-4.72487	16.8644	10.5141	-4.74418	NaN	NaN	NaN	16.634	10.5729	-4.60275
1296	0.966	15.6196	8.83618	-5.42699	16.3403	9.50124	-4.6931				16.534	9.45876	-4.6558	16.8531	10.3913	-4.71486	16.8565	10.4956	-4.74874	NaN	NaN	NaN	16.6362	10.563	-4.61796
1297	0.968	15.604	8.82264	-5.4308	16.332	9.48948	-4.69992				16.5144	9.44215	-4.65941	16.8459	10.3628	-4.70905	16.9055	10.5168	-4.75787	17.018	10.4752	-4.88694	16.6142	10.5344	-4.62027
1298	0.97	15.6055	8.81212	-5.43841	16.3226	9.47367	-4.70536				16.5219	9.42403	-4.6726	16.8196	10.3303	-4.70446	16.9028	10.4939	-4.75926	17.003	10.4695	-4.89919	16.6419	10.5449	-4.63353
1299	0.972	15.5879	8.79891	-5.44374	16.3244	9.47372	-4.71494				16.5227	9.42386	-4.68212	16.7747	10.2869	-4.69503	16.8993	10.4871	-4.75752	16.987	10.4493	-4.89482	16.6282	10.5412	-4.62994
1300	0.974	15.5731	8.78461	-5.44547	16.3062	9.45515	-4.71866				16.5032	9.40731	-4.6857	16.7884	10.2812	-4.69793	16.9253	10.4917	-4.76785	16.9681	10.4245	-4.89698	16.5802	10.4856	-4.61339
1301	0.976	15.5646	8.7741	-5.45364	16.3026	9.44504	-4.72688				16.4635	9.37451	-4.68332	16.79	10.2753	-4.69551	16.8984	10.4601	-4.755	16.9371	10.3921	-4.88549	16.5855	10.4875	-4.61013
1302	0.978	15.5421	8.75687	-5.45592	16.2931	9.43298	-4.73499				16.4643	9.37434	-4.69281	16.7846	10.2462	-4.69115	16.8936	10.446	-4.75294	16.9323	10.3796	-4.88468	16.5893	10.478	-4.61454
1303	0.98	15.549	8.75084	-5.46572	16.283	9.42122	-4.74044				16.4684	9.36549	-4.70189	16.8055	10.2369	-4.69503	16.8903	10.4311	-4.74824	16.927	10.3569	-4.87942	16.5759	10.4468	-4.61723
1304	0.982	15.5334	8.73858	-5.47009	16.2701	9.40475	-4.7488				16.449	9.34908	-4.70541	16.7644	10.1971	-4.68463	16.8821	10.4003	-4.73124	16.9504	10.3595	-4.89143	16.5318	10.4068	-4.60172
1305	0.984	15.5198	8.72498	-5.47317	16.2732	9.4053	-4.75496				16.4497	9.34942	-4.71045	16.8014	10.2064	-4.69379	16.9184	10.4136	-4.74332	16.9487	10.3455	-4.89223	16.5458	10.4116	-4.5922
1306	0.986	15.5013	8.70951	-5.4766	16.2621	9.3912	-4.76458				16.4337	9.32388	-4.71798	16.8255	10.2025	-4.69496	16.8276	10.3296	-4.72459	16.9597	10.3365	-4.88986	16.5221	10.3737	-4.59376
1307	0.988	15.5057	8.70146	-5.48572	16.2472	9.37564	-4.77272				16.4378	9.31505	-4.72702	16.814	10.1636	-4.69251	16.8162	10.3146	-4.72403	16.9491	10.3027	-4.88642	16.5106	10.3561	-4.5914
1308	0.99	15.4887	8.68838	-5.48637	16.2386	9.36402	-4.78143				16.396	9.29058	-4.73881	16.7903	10.1343	-4.67871	16.8183	10.2993	-4.71911	16.9455	10.2836	-4.87916	16.6077	10.4118	-4.61457
1309	0.992	15.4765	8.67548	-5.49281	16.2183	9.34454	-4.78753				16.3767	9.27486	-4.73786	16.7608	10.1077	-4.66432	16.8322	10.2944	-4.71705	16.9356	10.2625	-4.88135	16.5644	10.3659	-4.60352
1310	0.994	15.4517	8.65498	-5.49515	16.2254	9.34769	-4.79612				16.3344	9.25128	-4.73577	16.7482	10.0826	-4.66004	16.8378	10.2794	-4.7215	16.9557	10.2614	-4.8812	16.5755	10.3574	-4.59795
1311	0.996	15.452	8.64592	-5.50172	16.2111	9.3332	-4.80081				16.3386	9.24199	-4.74916	16.7511	10.0732	-4.65554	16.8193	10.2582	-4.7198	16.9472	10.2251	-4.88351	16.6021	10.3608	-4.60407
1312	0.998	15.4439	8.63557	-5.50548	16.1962	9.31598	-4.80921				16.3633	9.24846	-4.77795	16.7322	10.0401	-4.65521	16.8495	10.252	-4.72663	16.9172	10.1942	-4.86969	16.5003	10.2592	-4.57758
1313	1	15.4251	8.6204	-5.50723	16.1852	9.30449	-4.81599				16.3211	9.22498	-4.77577	16.7357	10.031	-4.65479	16.8461	10.2368	-4.72427	16.9221	10.18	-4.86575	16.5726	10.2929	-4.60171
1314	1.002	15.4252	8.61056	-5.5128	16.1763	9.29443	-4.82363				16.3442	9.23176	-4.78573	16.7216	10.0099	-4.64788	16.8205	10.2031	-4.71266	16.93	10.1691	-4.86517	16.562	10.2674	-4.59179
1315	1.004	15.4131	8.59698	-5.51666	16.1738	9.28981	-4.83367				16.3061	9.20016	-4.78811	16.7144	9.98704	-4.64592	16.8275	10.1885	-4.7119	16.9341	10.1579	-4.86295	16.5155	10.2095	-4.57255
1316	1.006	15.3908	8.57959	-5.51663	16.1592	9.27526	-4.83936				16.2635	9.17652	-4.78091	16.7126	9.98041	-4.65174	16.8425	10.1839	-4.72006	16.938	10.1437	-4.86359	16.5027	10.1927	-4.56498
1317	1.008	15.3893	8.56699	-5.52263	16.1437	9.25874	-4.84753				16.2872	9.18301	-4.8002	16.7348	9.98192	-4.65903	16.83	10.1543	-4.70914	16.8995	10.0904	-4.8505	16.4615	10.1447	-4.55624
1318	1.01	15.3699	8.54983	-5.52455	16.1294	9.24517	-4.8567				16.2682	9.16816	-4.79484	16.7218	9.96092	-4.66292	16.8197	10.1334	-4.70649	NaN	NaN	NaN	16.4899	10.1534	-4.56028
1319	1.012	15.3503	8.53395	-5.52554	16.1344	9.24631	-4.8639				16.231	9.13712	-4.80211	16.7616	9.97278	-4.66698	16.8091	10.1091	-4.69187	NaN	NaN	NaN	16.4724	10.1119	-4.55257
1320	1.014	15.3501	8.52323	-5.53133	16.1203	9.23242	-4.8727				16.2118	9.12045	-4.80486	16.7539	9.94777	-4.65683	16.8245	10.0938	-4.69221	NaN	NaN	NaN	16.5174	10.1422	-4.56856
1321	1.016	15.3365	8.51075	-5.5339	16.1022	9.21595	-4.88206				16.193	9.10463	-4.80818	16.7535	9.93551	-4.65737	16.818	10.0744	-4.68879	NaN	NaN	NaN	16.5176	10.1264	-4.56394
1322	1.018	15.3371	8.49989	-5.53963	16.1027	9.21494	-4.88835				16.1938	9.10444	-4.81749	16.7176	9.88628	-4.65167	16.8137	10.063	-4.68599	NaN	NaN	NaN	16.5377	10.1194	-4.567
1323	1.02	15.3156	8.48233	-5.53868	16.0853	9.19848	-4.89623				16.1978	9.09523	-4.83071	16.7079	9.88077	-4.6452	16.8256	10.0533	-4.67972	NaN	NaN	NaN	16.5654	10.1228	-4.57079
1324	1.022	15.2958	8.46518	-5.5381	16.0727	9.1856	-4.90477				16.1993	9.09485	-4.84935	16.7001	9.86016	-4.64348	16.7957	10.0193	-4.66401	NaN	NaN	NaN	16.5276	10.0867	-4.55691
1325	1.024	15.2956	8.45389	-5.54342	16.0737	9.18516	-4.91401				16.1573	9.07166	-4.84205	16.695	9.84436	-4.6388	16.7758	10.0024	-4.66665	NaN	NaN	NaN	16.539	10.0624	-4.55566
1326	1.026	15.2842	8.44313	-5.54604	16.0594	9.17228	-4.92002				16.1393	9.05683	-4.84594	16.6959	9.81611	-4.6444	16.7703	9.98378	-4.65216	NaN	NaN	NaN	16.5189	10.043	-4.55446
1327	1.028	15.2628	8.42602	-5.54541	16.0426	9.15638	-4.93129				16.182	9.07923	-4.86689	16.6657	9.8057	-4.63056	16.8042	9.98149	-4.66305	NaN	NaN	NaN	16.5516	10.0546	-4.56348
1328	1.03	15.2612	8.41403	-5.55366	16.0415	9.15398	-4.93945				16.1448	9.04779	-4.87334	16.7354	9.83931	-4.64753	16.7873	9.959	-4.65379	NaN	NaN	NaN	16.553	10.0334	-4.56785
1329	1.032	15.2451	8.39992	-5.55246	16.025	9.13948	-4.94697				16.1455	9.0476	-4.88264	16.78	9.8522	-4.65734	16.7702	9.91498	-4.64888	NaN	NaN	NaN	16.5136	10.0003	-4.55187
1330	1.034	15.244	8.38784	-5.55786	16.0237	9.1377	-4.95583				16.1271	9.03144	-4.89018	16.7682	9.82536	-4.65763	16.7569	9.89467	-4.64627	NaN	NaN	NaN	16.5341	9.99523	-4.56048
1331	1.036	15.2249	8.37245	-5.55533	16.0076	9.12298	-4.96237				16.1277	9.03176	-4.89512	16.7223	9.76898	-4.63928	16.7421	9.87916	-4.64564	NaN	NaN	NaN	16.5673	9.99979	-4.56447
1332	1.038	15.2119	8.36065	-5.56011	15.9903	9.10821	-4.97233				16.1132	9.00699	-4.91143	16.7284	9.75461	-4.64546	16.6959	9.8353	-4.62811	NaN	NaN	NaN	16.5168	9.95654	-4.55447
1333	1.04	15.2171	8.35382	-5.56709	15.9881	9.10582	-4.98003				16.094	8.99161	-4.90532	16.7041	9.71821	-4.63853	16.7368	9.84138	-4.6352	NaN	NaN	NaN	16.5079	9.92516	-4.55285
1334	1.042	15.1955	8.33613	-5.56522	15.9713	9.09056	-4.98873				16.0949	8.99091	-4.9189	16.742	9.73224	-4.65094	16.7377	9.82391	-4.64067	NaN	NaN	NaN	16.4871	9.90778	-4.54347
1335	1.044	15.1746	8.31817	-5.56504	15.9701	9.08949	-4.99804				16.0765	8.97484	-4.92635	16.747	9.71941	-4.65507	16.7088	9.78624	-4.63284	NaN	NaN	NaN	16.5237	9.89815	-4.55818
1336	1.046	15.16	8.30576	-5.56623	15.9516	9.07375	-5.00589				16.0589	8.95917	-4.93872	16.7444	9.70002	-4.66381	16.6966	9.76392	-4.63257	NaN	NaN	NaN	16.4979	9.86295	-4.54635
1337	1.048	15.163	8.29717	-5.57333	15.9312	9.05689	-5.01349				16.0595	8.95952	-4.94366	16.712	9.65912	-4.66059	16.6968	9.74858	-4.62744	NaN	NaN	NaN	16.4974	9.85634	-4.54663
1338	1.05	15.1439	8.28142	-5.57129	15.9306	9.05587	-5.02209				16.0191	8.93671	-4.94542	16.6708	9.62531	-4.65352	16.698	9.72338	-4.63385	NaN	NaN	NaN	16.5259	9.86832	-4.55434
1339	1.052	15.1305	8.26954	-5.57456	15.9129	9.04136	-5.03016				16.0425	8.94419	-4.96092	16.6401	9.59276	-4.65133	16.6579	9.69193	-4.62885	NaN	NaN	NaN	16.4804	9.82224	-4.54213
1340	1.054	15.1282	8.25683	-5.58131	15.9127	9.04067	-5.03651				16.0245	8.92776	-4.9726	16.6115	9.55284	-4.64562	16.6425	9.66168	-4.62518	NaN	NaN	NaN	16.4545	9.79606	-4.54311
1341	1.056	15.11	8.24145	-5.58177	15.895	9.02643	-5.04572				16.0062	8.91238	-4.97565	16.6403	9.56375	-4.66184	16.644	9.65684	-4.62595	NaN	NaN	NaN	16.4239	9.76031	-4.53568
1342	1.058	15.101	8.23422	-5.58249	15.8915	9.02313	-5.05477				15.9888	8.89686	-4.9879	16.6226	9.54189	-4.66348	16.6325	9.63545	-4.62726	NaN	NaN	NaN	16.4261	9.74424	-4.54153
1343	1.06	15.084	8.21836	-5.58705	15.871	9.00621	-5.06166				15.9895	8.89668	-4.99711	16.6127	9.52516	-4.67813	16.6006	9.60478	-4.62798	NaN	NaN	NaN	16.4256	9.72511	-4.55083
1344	1.062	15.0617	8.20067	-5.58566	15.8689	9.00551	-5.06979				15.9502	8.87395	-5.00791	16.6253	9.52288	-4.69165	16.5868	9.59685	-4.62803	NaN	NaN	NaN	16.3901	9.68032	-4.54531
1345	1.064	15.0495	8.19013	-5.58891	15.8508	8.99118	-5.07716				15.9313	8.8589	-5.00173	16.5782	9.47674	-4.68896	16.5949	9.58959	-4.63395	NaN	NaN	NaN	16.3817	9.66042	-4.54283
1346	1.066	15.032	8.17544	-5.58946	15.8491	8.98907	-5.08714				15.9134	8.84316	-5.00897	16.5629	9.45438	-4.69593	16.5866	9.56631	-4.64134	NaN	NaN	NaN	16.4047	9.65661	-4.54898
1347	1.068	15.0358	8.16758	-5.59734	15.8263	8.97115	-5.09329				15.936	8.85018	-5.01957	16.5529	9.43663	-4.69628	16.5589	9.54695	-4.64242	NaN	NaN	NaN	16.4132	9.65686	-4.56088
1348	1.07	15.0164	8.15237	-5.59803	15.8268	8.97158	-5.10209				15.9337	8.8578	-5.03351	16.5454	9.43007	-4.70065	16.5708	9.53096	-4.65197	NaN	NaN	NaN	16.3627	9.61201	-4.55561
1349	1.072	15.0081	8.14424	-5.60015	15.8078	8.95601	-5.10996				15.9163	8.84297	-5.0414	16.5326	9.41237	-4.70471	16.5549	9.5155	-4.65452	NaN	NaN	NaN	16.3308	9.57968	-4.54917
1350	1.074	14.9964	8.13407	-5.60405	15.7878	8.94009	-5.11876				15.939	8.84946	-5.0563	16.5417	9.41699	-4.71172	16.5614	9.50445	-4.66447	NaN	NaN	NaN	16.332	9.57147	-4.55955
1351	1.076	14.9808	8.12072	-5.60395	15.7881	8.94053	-5.12397				15.9186	8.84244	-5.06893	16.506	9.38684	-4.71589	16.5684	9.50328	-4.67644	NaN	NaN	NaN	16.3644	9.58271	-4.57281
1352	1.078	14.9675	8.10932	-5.60628	15.7716	8.92635	-5.13351				15.9186	8.84244	-5.06893	16.5171	9.38521	-4.73258	16.5591	9.49518	-4.68082	NaN	NaN	NaN	16.3398	9.55485	-4.57683
1353	1.08	14.9538	8.09757	-5.60908	15.7664	8.92221	-5.14247				15.9232	8.83374	-5.08676	16.4832	9.35407	-4.74086	16.495	9.44088	-4.67114	NaN	NaN	NaN	16.2975	9.5236	-4.57166
1354	1.082	14.9419	8.08724	-5.61489	15.745	8.90403	-5.14782				15.9214	8.84225	-5.1014	16.479	9.34304	-4.75207	16.4982	9.42892	-4.68393	NaN	NaN	NaN	16.3277	9.53298	-4.58204
1355	1.084	14.9201	8.06903	-5.61539	15.7415	8.90314	-5.15467				15.8842	8.81127	-5.0973	16.4284	9.30267	-4.76142	16.4902	9.40656	-4.68875	NaN	NaN	NaN	16.2781	9.48933	-4.5775
1356	1.086	14.9125	8.06235	-5.61924	15.7249	8.88787	-5.16116				15.8856	8.81145	-5.11138	16.4031	9.27638	-4.76983	16.4974	9.40344	-4.70627	NaN	NaN	NaN	16.2932	9.4916	-4.5898
1357	1.088	14.905	8.05553	-5.62274	15.7257	8.88871	-5.16968				15.8864	8.81127	-5.12055	16.3925	9.26632	-4.78409	16.469	9.37219	-4.70962	NaN	NaN	NaN	16.2682	9.46079	-4.59096
1358	1.09	14.8904	8.04313	-5.6271	15.7054	8.8724	-5.17711				15.8692	8.79601	-5.13254	16.3733	9.24966	-4.79099	16.4543	9.34997	-4.71654	NaN	NaN	NaN	16.2633	9.45548	-4.59866
1359	1.092	14.8669	8.02349	-5.63198	15.6868	8.85701	-5.18306				15.8513	8.78095	-5.13536	16.3671	9.24154	-4.79993	16.4328	9.32292	-4.72334	NaN	NaN	NaN	16.2651	9.45532	-4.60511
1360	1.094	14.8626	8.0196	-5.63138	15.6886	8.85713	-5.19363				15.8335	8.76593	-5.13817	16.3335	9.22261	-4.8009	16.4102	9.31259	-4.72741	NaN	NaN	NaN	16.2478	9.43186	-4.61798
1361	1.096	14.8671	8.02219	-5.64115	15.6687	8.84062	-5.1993				15.8162	8.75125	-5.14584	16.3175	9.2122	-4.81739	16.3875	9.29038	-4.73779	NaN	NaN	NaN	16.2757	9.44094	-4.63156
1362	1.098	14.8385	7.99856	-5.639	15.652	8.82666	-5.20395				15.8166	8.75027	-5.15433	16.3074	9.21197	-4.8253	16.3839	9.27385	-4.74229	NaN	NaN	NaN	16.254	9.42196	-4.64022
1363	1.1	14.8077	7.97134	-5.63633	15.6493	8.82373	-5.21368				15.7994	8.73565	-5.16199	16.3186	9.21525	-4.84493	16.3673	9.26365	-4.74841	NaN	NaN	NaN	16.2399	9.41222	-4.63468
1364	1.102	14.8211	7.9832	-5.64848	15.635	8.81108	-5.2221				15.7786	8.72901	-5.16531	16.2935	9.20229	-4.85648	16.3659	9.26453	-4.76589	NaN	NaN	NaN	16.2449	9.41097	-4.65612
1365	1.104	14.7851	7.95588	-5.64574	15.6193	8.79767	-5.22788				15.7423	8.69991	-5.15749	16.29	9.20473	-4.87679	16.3745	9.26649	-4.78014	16.5335	9.14148	-4.9083	16.2088	9.38119	-4.65301
1366	1.106	14.7797	7.94874	-5.64885	15.6179	8.79561	-5.23645				15.743	8.69974	-5.16657	16.2754	9.19181	-4.88504	16.3335	9.24311	-4.77862	16.5358	9.13742	-4.91384	16.1966	9.36407	-4.65613
1367	1.108	14.7533	7.93592	-5.65057	15.6036	8.78321	-5.24217				15.7471	8.69084	-5.17933	16.2452	9.18136	-4.89874	16.3296	9.24098	-4.78758	16.5375	9.13054	-4.92476	16.1796	9.35493	-4.67086
1368	1.11	14.7411	7.92688	-5.65412	15.5849	8.76653	-5.24958				15.7266	8.6838	-5.18684	16.263	9.19192	-4.92137	16.3326	9.23904	-4.80082	16.5187	9.12026	-4.92941	16.1923	9.36449	-4.68476
1369	1.112	14.7135	7.91287	-5.65463	15.5841	8.76594	-5.25459				15.7091	8.66902	-5.18955	16.218	9.16772	-4.92848	16.3258	9.23577	-4.81348	16.5353	9.12864	-4.94631	16.184	9.34865	-4.68876
1370	1.114	14.7084	7.90749	-5.66275	15.5668	8.7486	-5.26189				15.7098	8.66885	-5.19862	16.2363	9.18588	-4.94172	16.3047	9.21717	-4.82742	16.5278	9.12255	-4.94605	16.1654	9.34279	-4.69446
1371	1.116	14.7021	7.90173	-5.66976	15.5559	8.73862	-5.26879				15.7113	8.66851	-5.21676	16.2243	9.18313	-4.96394	16.2978	9.21419	-4.83786	16.5117	9.10436	-4.95994	16.1692	9.34299	-4.70975
1372	1.118	14.6944	7.89512	-5.6728	15.5375	8.72257	-5.27119				15.7151	8.66011	-5.22525	16.2031	9.17111	-4.97127	16.2882	9.20878	-4.85067	16.4737	9.09219	-4.95914	16.1666	9.3409	-4.72608
1373	1.12	14.6708	7.88539	-5.67459	15.5378	8.72148	-5.28072				15.6976	8.64538	-5.22791	16.1937	9.17537	-4.99043	16.2691	9.20375	-4.85788	16.4869	9.09704	-4.97978	16.16	9.34334	-4.74191
1374	1.122	14.6631	7.87923	-5.68038	15.5268	8.71108	-5.28537				15.6805	8.62968	-5.23895	16.2051	9.18983	-5.01243	16.2648	9.20071	-4.87239	16.4637	9.08512	-4.98638	16.129	9.31899	-4.75154
1375	1.124	14.6407	7.86947	-5.68288	15.5014	8.68988	-5.28829				15.6423	8.60959	-5.23644	16.1687	9.17046	-5.019	16.2589	9.20021	-4.88378	16.447	9.07914	-5.00188	16.13	9.32577	-4.77098
1376	1.126	14.6316	7.86064	-5.68728	15.4917	8.67903	-5.299				15.6428	8.60988	-5.24126	16.1592	9.17146	-5.04168	16.2407	9.19503	-4.90218	16.4249	9.06872	-5.01585	16.1222	9.32637	-4.78355
1377	1.128	14.6247	7.85517	-5.69531	15.4809	8.66844	-5.30531				15.6251	8.59451	-5.24326	16.14	9.16821	-5.04699	16.2399	9.19781	-4.93007	16.4293	9.07871	-5.04728	16.0811	9.29934	-4.79358
1378	1.13	14.6039	7.84612	-5.69741	15.4691	8.6569	-5.30551				15.6478	8.60041	-5.26713	16.1287	9.16662	-5.06608	16.2322	9.2087	-4.94485	16.42	9.07958	-5.05287	16.0706	9.29833	-4.80752
1379	1.132	14.5906	7.83901	-5.70214	15.4641	8.6516	-5.31461				15.6124	8.57144	-5.2633	16.127	9.17011	-5.08037	16.2423	9.21176	-4.9582	16.4274	9.08995	-5.07598	16.058	9.29629	-4.82236
1380	1.134	14.5762	7.83114	-5.70677	15.4479	8.63596	-5.31693				15.5956	8.55722	-5.27071	16.1356	9.17792	-5.09994	16.1959	9.19427	-4.96666	16.381	9.06709	-5.08434	16.0509	9.29794	-4.84914
1381	1.136	14.5635	7.82471	-5.71007	15.4382	8.62558	-5.32432				15.5964	8.55705	-5.27971	16.1138	9.17462	-5.11258	16.2086	9.20446	-4.99914	16.3697	9.07083	-5.09535	16.043	9.29724	-4.86517
1382	1.138	14.5488	7.81843	-5.71593	15.4265	8.61388	-5.32876				15.6004	8.54825	-5.29229	16.0839	9.16021	-5.11574	16.1789	9.18862	-5.00273	16.3809	9.07686	-5.12565	16.0249	9.29052	-4.87784
1383	1.14	14.52	7.80503	-5.71787	15.4143	8.6016	-5.33053				15.5619	8.52812	-5.28483	16.0746	9.16209	-5.13327	16.1732	9.19363	-5.0201	16.3502	9.06857	-5.13933	15.9996	9.27902	-4.88851
1384	1.142	14.5179	7.80282	-5.7251	15.4056	8.59053	-5.33655				15.5448	8.5137	-5.28738	16.0716	9.16046	-5.14896	16.151	9.18491	-5.03801	16.3338	9.06627	-5.15593	16.0009	9.28833	-4.91089
1385	1.144	14.4968	7.79457	-5.72825	15.4032	8.58554	-5.34491				15.5458	8.51308	-5.30052	16.0464	9.15135	-5.16413	16.1325	9.17871	-5.05254	16.3021	9.05547	-5.1686	15.9919	9.28936	-4.92632
1386	1.146	14.4906	7.7904	-5.73758	15.3891	8.57197	-5.3489				15.5313	8.48978	-5.30178	16.0401	9.15836	-5.17945	16.1168	9.17941	-5.06724	16.2955	9.06169	-5.18534	15.9715	9.282	-4.94204
1387	1.148	14.4667	7.77842	-5.73739	15.369	8.55336	-5.35171				15.515	8.47529	-5.31325	16.0287	9.1558	-5.20336	16.0986	9.17447	-5.08333	16.2827	9.05605	-5.20977	15.9719	9.29047	-4.96702
1388	1.15	14.4652	7.77649	-5.74794	15.356	8.54003	-5.35474				15.5158	8.47512	-5.3222	16.0319	9.16578	-5.224	16.0913	9.17408	-5.09645	16.2626	9.05363	-5.226	15.964	9.29407	-4.98644
1389	1.152	14.4469	7.77001	-5.75129	15.341	8.52642	-5.35728				15.4986	8.46132	-5.32056	15.9996	9.14864	-5.23532	16.0533	9.16307	-5.11586	16.2469	9.0525	-5.2426	15.9413	9.28603	-4.99774
1390	1.154	14.4263	7.76269	-5.75543	15.3334	8.51545	-5.36145				15.4816	8.44706	-5.32305	15.9792	9.13903	-5.24842	16.0644	9.1802	-5.13681	16.2473	9.05534	-5.26968	15.9085	9.26749	-5.01166
1391	1.156	14.4252	7.76132	-5.76194	15.3186	8.50156	-5.36487				15.506	8.44478	-5.33719	15.966	9.13774	-5.26354	16.0578	9.1803	-5.1576	16.2191	9.04382	-5.28863	15.9102	9.27912	-5.02538
1392	1.158	14.4047	7.75367	-5.76401	15.3064	8.48828	-5.37151				15.489	8.43055	-5.33966	15.9829	9.16143	-5.2845	16.0287	9.17367	-5.17116	16.1912	9.03728	-5.30333	15.8901	9.269	-5.04434
1393	1.16	14.377	7.74043	-5.76516	15.2935	8.4751	-5.37492				15.4542	8.4028	-5.33153	15.9511	9.14479	-5.29602	16.0428	9.18336	-5.19765	16.1831	9.03539	-5.32554	15.8828	9.27093	-5.06384
1394	1.162	14.375	7.73886	-5.77311	15.2865	8.46423	-5.37936				15.4549	8.40263	-5.34043	15.9569	9.15701	-5.31359	16.0244	9.17766	-5.21337	16.155	9.02845	-5.33937	15.8674	9.26721	-5.07795
1395	1.164	14.3565	7.73074	-5.77765	15.271	8.4502	-5.38184				15.4591	8.39347	-5.35697	15.9285	9.14497	-5.33007	16.0117	9.17489	-5.2264	16.1355	9.02021	-5.35206	15.8593	9.26844	-5.10384
1396	1.166	14.353	7.72816	-5.78449	15.2704	8.44591	-5.38705				15.4219	8.373	-5.35768	15.8896	9.12013	-5.33751	15.9915	9.17114	-5.24809	16.1208	9.02432	-5.36943	15.8325	9.25654	-5.11932
1397	1.168	14.336	7.72226	-5.78872	15.2576	8.43175	-5.39056				15.4424	8.37887	-5.36351	15.9139	9.14763	-5.3597	15.9774	9.1665	-5.26954	16.1144	9.03269	-5.39427	15.8293	9.26258	-5.14065
1398	1.17	14.3148	7.71527	-5.79141	15.2469	8.41766	-5.39455				15.4081	8.35091	-5.35948	15.895	9.14423	-5.36644	15.9437	9.1505	-5.2789	16.1088	9.0439	-5.41341	15.7951	9.24555	-5.14998
1399	1.172	14.2901	7.70359	-5.79489	15.2158	8.38982	-5.39272				15.409	8.35024	-5.37244	15.9163	9.15765	-5.39436	15.9357	9.15097	-5.30311	NaN	NaN	NaN	15.7875	9.24403	-5.17548
1400	1.174	14.2884	7.70155	-5.80241	15.2138	8.38453	-5.39712				15.3921	8.33672	-5.37075	15.844	9.11884	-5.39204	15.9326	9.15626	-5.31795	NaN	NaN	NaN	15.7772	9.24428	-5.19001
1401	1.176	14.2702	7.69556	-5.80516	15.1991	8.36935	-5.39932				15.3754	8.32275	-5.37315	15.8713	9.14169	-5.42184	15.914	9.15117	-5.34412	NaN	NaN	NaN	15.766	9.24242	-5.20627
1402	1.178	14.2501	7.68856	-5.80727	15.1863	8.35486	-5.40191				15.396	8.32804	-5.38306	15.8281	9.11774	-5.42829	15.8549	9.10995	-5.34723	NaN	NaN	NaN	15.7513	9.23948	-5.22743
1403	1.18	14.2403	7.67998	-5.8148	15.1735	8.34074	-5.40506				15.3624	8.30063	-5.38374	15.8017	9.09569	-5.45105	15.8743	9.1271	-5.38413	NaN	NaN	NaN	15.735	9.23474	-5.24818
1404	1.182	14.2221	7.67346	-5.82033	15.1631	8.32963	-5.40432				15.3832	8.30667	-5.39431	15.7748	9.07373	-5.46908	15.8448	9.11434	-5.39081	NaN	NaN	NaN	15.7246	9.23576	-5.2598
1405	1.184	14.2035	7.66743	-5.8218	15.1624	8.32458	-5.40985				15.3119	8.25921	-5.38204	15.7585	9.06994	-5.48295	15.8459	9.11851	-5.4184	NaN	NaN	NaN	15.7009	9.22518	-5.27393
1406	1.186	14.2016	7.66516	-5.82897	15.1485	8.30966	-5.41424				15.3158	8.25059	-5.39427	15.7524	9.0649	-5.50419	15.8141	9.10551	-5.43205	NaN	NaN	NaN	15.6914	9.22573	-5.28515
1407	1.188	14.1799	7.65652	-5.82933	15.1478	8.30514	-5.41978				15.3338	8.26405	-5.40954	15.7176	9.04538	-5.51366	15.7935	9.08932	-5.44173	NaN	NaN	NaN	15.6556	9.20336	-5.2935
1408	1.19	14.1612	7.65031	-5.83092	15.1366	8.29084	-5.42181				15.3	8.23662	-5.40541	15.7075	9.04003	-5.52969	15.7714	9.08354	-5.46177	NaN	NaN	NaN	15.6425	9.19593	-5.30815
1409	1.192	14.1396	7.641	-5.83544	15.1231	8.27607	-5.42568				15.2666	8.20885	-5.40534	15.6989	9.04077	-5.54055	15.7828	9.09148	-5.48562	NaN	NaN	NaN	15.6214	9.18656	-5.32206
1410	1.194	14.1328	7.63479	-5.84202	15.1087	8.2604	-5.42892				15.27	8.20123	-5.40941	15.6509	9.00601	-5.54432	15.7662	9.08093	-5.49526	NaN	NaN	NaN	15.6072	9.18097	-5.33339
1411	1.196	14.1142	7.62859	-5.84315	15.0969	8.24651	-5.43113				15.2537	8.18755	-5.41173	15.6295	8.99335	-5.56004	15.7468	9.07185	-5.51101	NaN	NaN	NaN	15.6076	9.18347	-5.35371
1412	1.198	14.1237	7.6356	-5.84924	15.0811	8.23004	-5.43236				15.2773	8.18501	-5.42563	15.6055	8.98405	-5.56298	15.7057	9.05848	-5.52801	NaN	NaN	NaN	15.582	9.1691	-5.37135
1413	1.2	14.1073	7.63128	-5.85786	15.0663	8.21514	-5.43279				15.2241	8.15193	-5.41972	15.5924	8.9721	-5.57334	15.6798	9.04489	-5.53551	NaN	NaN	NaN	15.5446	9.14457	-5.37718
1414	1.202	14.07	7.6098	-5.8532	15.0653	8.21055	-5.43627				15.2112	8.13078	-5.42605	15.5909	8.96899	-5.59411	15.649	9.02414	-5.54699	NaN	NaN	NaN	15.5507	9.15294	-5.38067
1415	1.204	14.067	7.60669	-5.85914	15.0532	8.19661	-5.43871				15.2308	8.1367	-5.42777	15.5425	8.93552	-5.59623	15.6509	9.0241	-5.56749	NaN	NaN	NaN	15.5128	9.12866	-5.39122
1416	1.206	14.0477	7.59984	-5.85985	15.0362	8.1811	-5.44046				15.1983	8.10844	-5.4357	15.5264	8.921	-5.60908	15.6296	9.01401	-5.57476	NaN	NaN	NaN	15.5094	9.12479	-5.40762
1417	1.208	14.0251	7.58964	-5.86402	15.0221	8.16642	-5.44105				15.1993	8.10901	-5.44508	15.5244	8.91613	-5.61848	15.5997	8.9895	-5.58633	NaN	NaN	NaN	15.4863	9.11091	-5.42136
1418	1.21	14.0193	7.58493	-5.86516	15.0113	8.15252	-5.44556				15.1826	8.09526	-5.44266	15.4802	8.87523	-5.62399	15.5727	8.96886	-5.59844	NaN	NaN	NaN	15.4785	9.10836	-5.42228
1419	1.212	13.9981	7.57578	-5.87088	14.9935	8.13631	-5.44678				15.1494	8.06905	-5.43445	15.4314	8.83558	-5.62699	15.5475	8.94962	-5.5934	NaN	NaN	NaN	15.4792	9.10641	-5.44049
1420	1.214	13.9954	7.57293	-5.87675	14.979	8.12146	-5.44833				15.1529	8.06102	-5.44246	15.4576	8.85579	-5.64818	15.4955	8.91564	-5.59632	NaN	NaN	NaN	15.4479	9.08691	-5.44087
1421	1.216	13.9712	7.56195	-5.87556	14.9783	8.11814	-5.45225				15.1541	8.0599	-5.45917	15.4444	8.84604	-5.66055	15.5023	8.91117	-5.61738	NaN	NaN	NaN	15.4118	9.05895	-5.44455
1422	1.218	13.967	7.55791	-5.88227	14.9677	8.10552	-5.45562				15.1375	8.04624	-5.45671	15.4237	8.82778	-5.6619	15.4858	8.89833	-5.62816	NaN	NaN	NaN	15.3878	9.03895	-5.44789
1423	1.22	13.9371	7.54228	-5.87986	14.9517	8.09105	-5.45803				15.1217	8.0324	-5.46291	15.3989	8.81012	-5.66866	15.4807	8.8962	-5.64729	NaN	NaN	NaN	15.4022	9.05718	-5.46447
1424	1.222	13.9148	7.53284	-5.8783	14.9394	8.0786	-5.46255				15.1057	8.0191	-5.46512	15.3911	8.79452	-5.6675	15.464	8.88087	-5.65379	NaN	NaN	NaN	15.3749	9.03364	-5.46893
1425	1.224	13.9228	7.53867	-5.88408	14.9252	8.06475	-5.46689				15.0563	7.98029	-5.45054	15.366	8.7751	-5.6639	15.4688	8.88384	-5.66775	NaN	NaN	NaN	15.3621	9.01924	-5.48244
1426	1.226	13.8784	7.5111	-5.87767	14.9109	8.05192	-5.46794				15.0959	7.99058	-5.47064	15.3437	8.74919	-5.66163	15.435	8.86703	-5.67438	NaN	NaN	NaN	15.3595	9.01772	-5.49828
1427	1.228	13.8702	7.50368	-5.87965	14.8977	8.03875	-5.47221				15.044	7.95917	-5.46069	15.3679	8.75984	-5.67465	15.4359	8.85625	-5.6885	NaN	NaN	NaN	15.3642	9.02305	-5.50508
1428	1.23	13.8459	7.49188	-5.88247	14.8957	8.03586	-5.47584				15.048	7.9515	-5.47324	15.3674	8.73949	-5.67914	15.4154	8.83941	-5.68687	15.5938	8.78077	-5.87597	15.3219	8.99098	-5.5027
1429	1.232	13.8349	7.48282	-5.88163	14.8826	8.02361	-5.47849				15.0322	7.93838	-5.47542	15.3784	8.73543	-5.68202	15.391	8.8199	-5.68283	15.5665	8.77566	-5.87866	15.3225	8.99053	-5.51107
1430	1.234	13.8244	7.47279	-5.88661	14.8714	8.01229	-5.48134				15.0002	7.91197	-5.47515	15.3595	8.7127	-5.67941	15.3961	8.81488	-5.69858	15.5309	8.76423	-5.88356	15.2989	8.96908	-5.5112
1431	1.236	13.8226	7.4726	-5.89062	14.8572	7.99995	-5.48473				14.9847	7.89846	-5.48126	15.3515	8.69752	-5.67572	15.4075	8.80623	-5.71425	15.5223	8.75304	-5.89251	15.2823	8.95895	-5.50991
1432	1.238	13.8011	7.45982	-5.88956	14.8466	7.98919	-5.48797				14.9854	7.89827	-5.48982	15.3602	8.68718	-5.67776	15.3988	8.79513	-5.71658	15.5097	8.75034	-5.89274	15.299	8.95671	-5.53845
1433	1.24	13.7921	7.45349	-5.89369	14.833	7.97736	-5.48983				14.9534	7.87251	-5.48557	15.3447	8.66803	-5.67336	15.3909	8.78491	-5.72371	15.4785	8.73008	-5.88525	15.327	8.96824	-5.55908
1434	1.242	13.7774	7.44418	-5.89276	14.8169	7.96412	-5.49456				14.9534	7.87251	-5.48557	15.3249	8.64519	-5.66145	15.4157	8.78921	-5.73245	15.4916	8.72905	-5.89842	15.2708	8.9312	-5.54256
1435	1.244	13.7616	7.43433	-5.89561	14.7923	7.94508	-5.49903				14.9378	7.85958	-5.48772	15.3368	8.63974	-5.66709	15.419	8.77554	-5.73479	15.4867	8.72408	-5.90701	15.235	8.89824	-5.53745
1436	1.246	13.7458	7.42489	-5.89662	14.7801	7.93441	-5.50222				14.9068	7.83382	-5.492	15.2875	8.58844	-5.64838	15.4087	8.76665	-5.73462	15.4834	8.71499	-5.91524	15.2413	8.89384	-5.5507
1437	1.248	13.7221	7.41205	-5.89391	14.7753	7.93139	-5.51013				14.8886	7.82814	-5.49873	15.2982	8.58435	-5.6512	15.3909	8.74108	-5.73166	15.4608	8.69808	-5.91604	15.26	8.89897	-5.55513
1438	1.25	13.7119	7.40255	-5.89675	14.7673	7.92221	-5.51412				14.8758	7.80818	-5.49625	15.3195	8.58668	-5.65397	15.3854	8.72837	-5.72779	15.4445	8.68378	-5.8987	15.2809	8.88851	-5.57081
1439	1.252	13.6976	7.39834	-5.89397	14.7402	7.90355	-5.51348				14.8606	7.79492	-5.50227	15.3282	8.57694	-5.65462	15.3797	8.71506	-5.72435	15.4653	8.67655	-5.90459	15.3187	8.89412	-5.5852
1440	1.254	13.6801	7.38617	-5.89267	14.7279	7.89354	-5.52079				14.8446	7.78238	-5.49591	15.3356	8.56819	-5.65217	15.3882	8.70731	-5.73167	15.4395	8.64174	-5.89339	15.2916	8.86747	-5.57271
1441	1.256	13.6637	7.37286	-5.89244	14.7228	7.89046	-5.52302				14.8457	7.78245	-5.50895	15.3119	8.536	-5.64607	15.4023	8.69808	-5.73585	15.462	8.63756	-5.90266	15.3024	8.86106	-5.56782
1442	1.258	13.6504	7.36148	-5.89428	14.7094	7.88037	-5.52657				14.8116	7.76484	-5.50539	15.3031	8.51178	-5.6423	15.384	8.67289	-5.72553	15.4514	8.61828	-5.89976	15.2542	8.82145	-5.54894
1443	1.26	13.6351	7.34978	-5.89692	14.6887	7.86361	-5.53232				14.8154	7.7573	-5.51768	15.3274	8.50741	-5.65072	15.4159	8.67571	-5.72792	NaN	NaN	NaN	15.2446	8.80604	-5.54525
1444	1.262	13.6265	7.34392	-5.89646	14.6929	7.86404	-5.5403				14.8164	7.75665	-5.53004	15.3128	8.48713	-5.6472	15.3866	8.63545	-5.71276	NaN	NaN	NaN	15.274	8.81305	-5.55799
1445	1.264	13.609	7.33231	-5.89509	14.6793	7.85184	-5.54789				14.7661	7.72647	-5.51554	15.3106	8.4685	-5.64243	15.3766	8.61976	-5.71702	NaN	NaN	NaN	15.2595	8.78844	-5.54925
1446	1.266	13.5913	7.31963	-5.89243	14.6618	7.83822	-5.55117				14.7668	7.72627	-5.52396	15.3274	8.45886	-5.64299	15.4037	8.61842	-5.72199	NaN	NaN	NaN	15.2207	8.74973	-5.53044
1447	1.268	13.5813	7.31492	-5.893	14.6405	7.82723	-5.54767				14.7337	7.70869	-5.52879	15.3303	8.45061	-5.64217	15.3894	8.59291	-5.72725	NaN	NaN	NaN	15.2396	8.74093	-5.53791
1448	1.27	13.5646	7.30144	-5.89181	14.6369	7.82285	-5.55688				14.7183	7.6954	-5.53015	15.297	8.4305	-5.62782	15.3677	8.57589	-5.71357	NaN	NaN	NaN	15.1998	8.7056	-5.52483
1449	1.272	13.5484	7.28781	-5.89187	14.6177	7.80973	-5.55786				14.7014	7.691	-5.54198	15.2701	8.39617	-5.62055	15.3602	8.54853	-5.71147	NaN	NaN	NaN	15.1949	8.69356	-5.51562
1450	1.274	13.527	7.27332	-5.88694	14.611	7.80246	-5.55918				14.6673	7.67397	-5.53001	15.2415	8.36475	-5.60959	15.3356	8.51739	-5.69407	NaN	NaN	NaN	15.2188	8.70034	-5.52381
1451	1.276	13.5143	7.26553	-5.88524	14.5989	7.79371	-5.56693				14.6707	7.66627	-5.53768	15.2173	8.33297	-5.59433	15.3404	8.5128	-5.69446	NaN	NaN	NaN	15.2175	8.68214	-5.51671
1452	1.278	13.499	7.25344	-5.88309	14.5923	7.78719	-5.56735				14.6716	7.6656	-5.5499	15.2267	8.31977	-5.59434	15.3527	8.50132	-5.70584	NaN	NaN	NaN	15.1942	8.65412	-5.50853
1453	1.28	13.4839	7.24572	-5.88159	14.5748	7.78007	-5.57126				14.6379	7.64819	-5.54177	15.2243	8.3036	-5.59381	15.315	8.46933	-5.68789	NaN	NaN	NaN	15.1834	8.61669	-5.50833
1454	1.282	13.4696	7.23153	-5.88189	14.5553	7.76611	-5.57631				14.6418	7.6408	-5.55394	15.217	8.28741	-5.5891	15.3092	8.45223	-5.68446	NaN	NaN	NaN	15.1847	8.61436	-5.49614
1455	1.284	13.4395	7.205	-5.87793	14.541	7.76191	-5.57647				14.6086	7.62377	-5.55032	15.2049	8.27321	-5.58876	15.3045	8.43543	-5.67379	NaN	NaN	NaN	15.1815	8.59641	-5.49422
1456	1.286	13.442	7.21127	-5.87774	14.5043	7.74173	-5.58577				14.6282	7.62805	-5.57263	15.2043	8.25172	-5.58906	15.2899	8.41332	-5.66375	NaN	NaN	NaN	15.1719	8.58046	-5.48665
1457	1.288	13.4054	7.18104	-5.86809	14.4915	7.73057	-5.5851				14.5797	7.59898	-5.56265	15.2198	8.25641	-5.58777	15.2788	8.39244	-5.65586	NaN	NaN	NaN	15.1555	8.54315	-5.4785
1458	1.29	13.4057	7.18075	-5.87076	14.4877	7.72874	-5.59295				14.5801	7.59803	-5.57028	15.1945	8.23036	-5.58063	15.2712	8.37477	-5.64777	NaN	NaN	NaN	15.1432	8.53967	-5.47325
1459	1.292	13.4007	7.17969	-5.87903	14.4601	7.71377	-5.59411				14.5479	7.58098	-5.57494	15.1742	8.2019	-5.57048	15.2791	8.36088	-5.64629	NaN	NaN	NaN	15.1494	8.5214	-5.4735
1460	1.294	13.3901	7.16938	-5.88024	14.4619	7.71398	-5.59633				14.5483	7.58127	-5.57944	15.1461	8.17122	-5.55788	15.2549	8.33456	-5.63905	NaN	NaN	NaN	15.126	8.48982	-5.46157
1461	1.296	13.379	7.16627	-5.87337	14.4335	7.69817	-5.60199				14.5487	7.58029	-5.58703	15.1561	8.16851	-5.56322	15.251	8.32178	-5.63225	NaN	NaN	NaN	15.118	8.47396	-5.45509
1462	1.298	13.3696	7.15626	-5.87501	14.4271	7.6956	-5.60481				14.534	7.56809	-5.58899	15.1788	8.1552	-5.57148	15.2228	8.29692	-5.62066	NaN	NaN	NaN	15.0947	8.44484	-5.44469
1463	1.3	13.3737	7.1568	-5.87968	14.4096	7.68387	-5.60635				14.5168	7.5641	-5.59236	15.1824	8.15631	-5.56823	15.2582	8.30005	-5.62829	NaN	NaN	NaN	15.0943	8.43357	-5.4405
1464	1.302	13.3485	7.13525	-5.87498	14.3902	7.67502	-5.61598				14.5025	7.55147	-5.5981	15.1542	8.12744	-5.56206	15.2208	8.26159	-5.61449	NaN	NaN	NaN	15.076	8.41052	-5.4349
1465	1.304	13.3274	7.12237	-5.86721	14.3953	7.67748	-5.62084				14.5364	7.56783	-5.61839	15.122	8.09584	-5.54554	15.2029	8.24147	-5.60763	NaN	NaN	NaN	15.0904	8.40553	-5.43678
1466	1.306	13.2883	7.09055	-5.85831	14.366	7.6617	-5.6204				14.4886	7.53915	-5.60831	15.1551	8.10062	-5.56023	15.1961	8.2198	-5.59724	NaN	NaN	NaN	15.0857	8.38414	-5.43332
1467	1.308	13.2803	7.08861	-5.86089	14.3675	7.66172	-5.62644				14.4386	7.51831	-5.60347	15.1485	8.08298	-5.55611	15.1864	8.19757	-5.60072	NaN	NaN	NaN	15.0775	8.36434	-5.4293
1468	1.31	13.2806	7.08878	-5.87157	14.3325	7.64232	-5.62727				14.4575	7.52289	-5.62178	15.1468	8.07547	-5.55424	15.2026	8.18983	-5.59909	NaN	NaN	NaN	15.0878	8.35861	-5.43113
1469	1.312	13.2711	7.08614	-5.87046	14.3207	7.63982	-5.63371				14.4427	7.51057	-5.61924	15.1566	8.07237	-5.55924	15.1848	8.16958	-5.59098	NaN	NaN	NaN	15.0647	8.33441	-5.42121
1470	1.314	13.2692	7.08537	-5.87206	14.3002	7.62583	-5.639				14.4076	7.50141	-5.61624	15.1466	8.05155	-5.55681	15.1744	8.14723	-5.56541	NaN	NaN	NaN	15.0485	8.314	-5.41337
1471	1.316	13.2708	7.08568	-5.87868	14.3036	7.62771	-5.63908				14.3911	7.49656	-5.62707	15.1718	8.05501	-5.56817	15.1529	8.12408	-5.56042	NaN	NaN	NaN	15.0672	8.30757	-5.41972
1472	1.318	13.238	7.06279	-5.86392	14.2858	7.62181	-5.64419				14.3792	7.477	-5.62381	15.1271	8.02359	-5.55371	15.1882	8.13297	-5.56965	NaN	NaN	NaN	15.0458	8.28316	-5.41296
1473	1.32	13.2271	7.05235	-5.86089	14.2605	7.60623	-5.64811				14.3798	7.47681	-5.63202	15.1224	8.0133	-5.55477	15.1571	8.09852	-5.55255	NaN	NaN	NaN	14.9874	8.2318	-5.3928
1474	1.322	13.2201	7.05054	-5.85919	14.2434	7.59534	-5.65207				14.3631	7.47246	-5.63905	15.126	8.00307	-5.56023	15.1434	8.07666	-5.55126	NaN	NaN	NaN	14.9904	8.21719	-5.39487
1475	1.324	13.1848	7.02747	-5.85242	14.2202	7.58587	-5.65309				14.3637	7.47228	-5.64725	15.098	7.97663	-5.55711	15.1201	8.05587	-5.54021	NaN	NaN	NaN	14.9809	8.19912	-5.39245
1476	1.326	13.1717	7.01679	-5.85248	14.225	7.58845	-5.6596				14.3346	7.44865	-5.64278	15.0883	7.96813	-5.55962	15.129	8.04881	-5.53723	NaN	NaN	NaN	14.9818	8.18618	-5.3964
1477	1.328	13.1515	7.0047	-5.8535	14.2078	7.58338	-5.66336				14.3176	7.44408	-5.64536	15.0467	7.94278	-5.55202	15.0876	8.01152	-5.53021	NaN	NaN	NaN	14.982	8.18183	-5.39638
1478	1.33	13.1262	6.98349	-5.84408	14.1803	7.56661	-5.66536				14.3003	7.43924	-5.64352	14.9891	7.89302	-5.53507	15.0733	7.99531	-5.53012	NaN	NaN	NaN	14.952	8.15378	-5.38564
1479	1.332	13.1189	6.98198	-5.83976	14.1769	7.56677	-5.66794				14.2809	7.44222	-5.65121	14.9711	7.87456	-5.53311	15.062	7.97992	-5.53512	NaN	NaN	NaN	14.9316	8.12405	-5.37806
1480	1.334	13.1082	6.9795	-5.83555	14.1491	7.55334	-5.67297				14.2812	7.44177	-5.65496	14.97	7.86671	-5.5404	15.0619	7.96527	-5.53304	NaN	NaN	NaN	14.904	8.1016	-5.37521
1481	1.336	13.0946	6.96879	-5.84074	14.1443	7.54922	-5.67631				14.2824	7.44142	-5.6713	14.9554	7.86086	-5.53891	15.0256	7.93618	-5.52746	NaN	NaN	NaN	14.9399	8.1196	-5.38045
1482	1.338	13.0609	6.94554	-5.82432	14.1286	7.54495	-5.68035				14.2651	7.43657	-5.66942	14.9204	7.84316	-5.52937	15.0299	7.92728	-5.52649	NaN	NaN	NaN	14.8904	8.06908	-5.36946
1483	1.34	13.0558	6.94442	-5.8272	14.1128	7.53203	-5.6861				14.2169	7.41663	-5.66884	14.8923	7.81944	-5.53433	15.0025	7.91172	-5.52127	NaN	NaN	NaN	14.8793	8.05954	-5.37116
1484	1.342	13.0445	6.93396	-5.81962	14.1046	7.53165	-5.68708				14.2032	7.40444	-5.6744	14.8397	7.77716	-5.53113	14.9981	7.89897	-5.52967	NaN	NaN	NaN	14.8854	8.0524	-5.37934
1485	1.344	12.9941	6.89998	-5.79305	14.0838	7.5243	-5.69171				14.2036	7.40471	-5.67878	14.8001	7.75311	-5.52744	15.0071	7.89106	-5.54018	NaN	NaN	NaN	14.8512	8.0257	-5.36536
1486	1.346	12.9908	6.89634	-5.79301	14.0714	7.5137	-5.69484				14.1726	7.38894	-5.67935	14.7925	7.74172	-5.53806	14.9583	7.86585	-5.53216	NaN	NaN	NaN	14.8801	8.04495	-5.3802
1487	1.348	12.9727	6.88834	-5.78889	14.0494	7.50558	-5.69552				14.1594	7.37641	-5.68863	14.7719	7.73404	-5.5463	14.9541	7.85184	-5.53678	NaN	NaN	NaN	14.8552	8.02329	-5.37592
1488	1.35	12.9605	6.87923	-5.78729	14.0531	7.50819	-5.70028				14.1418	7.37257	-5.67931	14.7666	7.72764	-5.54882	14.935	7.84194	-5.539	NaN	NaN	NaN	14.8065	7.97877	-5.36585
1489	1.352	12.9535	6.87472	-5.79025	14.0207	7.49154	-5.70548				14.1427	7.37196	-5.69113	14.7415	7.70956	-5.54581	14.904	7.81433	-5.54312	NaN	NaN	NaN	14.8109	7.97959	-5.36999
1490	1.354	12.9299	6.86216	-5.78006	14.0076	7.48555	-5.70552				14.1436	7.37135	-5.70295	14.7032	7.68573	-5.55141	14.8754	7.78562	-5.54201	NaN	NaN	NaN	14.7935	7.95942	-5.37677
1491	1.356	12.9261	6.85945	-5.78404	13.9824	7.47503	-5.7047				14.1126	7.35547	-5.69912	14.6921	7.68573	-5.56187	14.8919	7.7981	-5.55385	NaN	NaN	NaN	14.7977	7.9581	-5.38302
1492	1.358	12.9023	6.84722	-5.7779	13.9765	7.47027	-5.71004				14.0788	7.34604	-5.69533	14.6851	7.68302	-5.5683	14.8527	7.76682	-5.54782	NaN	NaN	NaN	14.7879	7.94945	-5.38521
1493	1.36	12.9014	6.84617	-5.78023	13.9644	7.4642	-5.71472				14.0491	7.33043	-5.70396	14.6755	7.67779	-5.57937	14.844	7.76272	-5.56141	14.8983	7.62846	-5.73431	14.7686	7.93317	-5.38414
1494	1.362	12.8762	6.83259	-5.77605	13.9477	7.45635	-5.71518				14.0494	7.33072	-5.70832	14.6251	7.65422	-5.57825	14.8403	7.75756	-5.56549	14.8843	7.61016	-5.74086	14.768	7.92047	-5.39542
1495	1.364	12.8691	6.83009	-5.77487	13.9305	7.44822	-5.71718				14.033	7.32635	-5.71079	14.6266	7.66296	-5.58634	14.8149	7.73875	-5.56929	14.8581	7.59063	-5.74197	14.7326	7.90105	-5.38812
1496	1.366	12.8476	6.81903	-5.76974	13.9077	7.43833	-5.71895				14.0194	7.31487	-5.71254	14.6066	7.6554	-5.59777	14.801	7.72469	-5.57523	14.8647	7.58762	-5.75127	14.7309	7.89366	-5.39675
1497	1.368	12.8329	6.81476	-5.76559	13.8935	7.4308	-5.72498				14.0201	7.3147	-5.72058	14.5892	7.65026	-5.60363	14.7743	7.71031	-5.58293	14.8939	7.59225	-5.76695	14.7074	7.87196	-5.40228
1498	1.37	12.8241	6.81109	-5.7656	13.886	7.42952	-5.72702				13.9893	7.29951	-5.71305	14.5831	7.64576	-5.61468	14.7605	7.70092	-5.58363	14.8648	7.58895	-5.76278	14.6828	7.86122	-5.40722
1499	1.372	12.8115	6.80337	-5.76687	13.8729	7.4184	-5.7277				13.9902	7.29892	-5.72476	14.5609	7.63616	-5.63102	14.7536	7.69431	-5.5942	14.8704	7.58953	-5.7784	14.691	7.85682	-5.41675
1500	1.374	12.787	6.7917	-5.76259	13.8568	7.40886	-5.72891				13.9598	7.28336	-5.72092	14.5591	7.64158	-5.6396	14.7486	7.69137	-5.60277	14.8578	7.58167	-5.77663	14.6411	7.83155	-5.40066
1501	1.376	12.7725	6.78795	-5.75864	13.8373	7.39992	-5.7344				13.9436	7.27906	-5.72336	14.5376	7.63764	-5.64155	14.7224	7.68012	-5.60353	14.8535	7.57752	-5.78687	14.6458	7.83229	-5.41803
1502	1.378	12.7627	6.78524	-5.75654	13.8359	7.40013	-5.73697				13.9271	7.27521	-5.72211	14.515	7.63382	-5.64581	14.7327	7.68729	-5.61814	14.8414	7.55754	-5.79276	14.5986	7.80515	-5.40962
1503	1.38	12.7482	6.78204	-5.74937	13.8064	7.38286	-5.73823				13.8998	7.2527	-5.71759	14.4946	7.62641	-5.64955	14.7092	7.68207	-5.62493	14.8075	7.54037	-5.78803	14.5921	7.80303	-5.41881
1504	1.382	12.7438	6.78768	-5.74895	13.7866	7.37432	-5.73575				13.8843	7.24759	-5.72734	14.4674	7.61909	-5.65829	14.6869	7.67539	-5.62866	14.8007	7.53645	-5.79439	14.5765	7.79607	-5.42766
1505	1.384	12.7346	6.78555	-5.75103	13.7787	7.36733	-5.74326				13.8846	7.24787	-5.73165	14.4683	7.62831	-5.67157	14.6829	7.67889	-5.63481	14.7513	7.52671	-5.78649	14.5686	7.79679	-5.44288
1506	1.386	12.6926	6.75982	-5.74114	13.7669	7.35859	-5.73978				13.8688	7.24319	-5.73772	14.4392	7.61573	-5.67795	14.6685	7.67629	-5.64249	14.705	7.50674	-5.78601	14.5505	7.78874	-5.45654
1507	1.388	12.6719	6.74611	-5.73872	13.7494	7.34995	-5.74325				13.8546	7.23253	-5.72782	14.433	7.61292	-5.69084	14.6512	7.66891	-5.65064	14.7274	7.51843	-5.79995	14.5328	7.78119	-5.46075
1508	1.39	12.6561	6.74249	-5.73343	13.7302	7.33855	-5.74561				13.8257	7.21737	-5.73621	14.4143	7.61313	-5.69432	14.6142	7.66239	-5.65499	14.7158	7.52072	-5.80698	14.5116	7.77425	-5.46071
1509	1.392	12.6522	6.74747	-5.73438	13.7144	7.32891	-5.74401				13.8098	7.21248	-5.73798	14.4033	7.61494	-5.70745	14.5969	7.66264	-5.66134	14.7072	7.52083	-5.83195	14.4833	7.76538	-5.47447
1510	1.394	12.6336	6.73889	-5.734	13.7022	7.31997	-5.74296				13.7935	7.20873	-5.73674	14.3941	7.62155	-5.72333	14.5721	7.66163	-5.6664	14.6468	7.50387	-5.82998	14.4912	7.77672	-5.4936
1511	1.396	12.6194	6.73658	-5.72963	13.6784	7.30724	-5.74393				13.764	7.19357	-5.73292	14.3832	7.63131	-5.73376	14.5674	7.66132	-5.68063	14.6423	7.50757	-5.8402	14.494	7.77536	-5.51271
1512	1.398	12.5969	6.72844	-5.72416	13.6774	7.3076	-5.74658				13.7513	7.18202	-5.73824	14.3666	7.62805	-5.74908	14.5435	7.65617	-5.68609	14.6294	7.51051	-5.8544	14.486	7.77753	-5.52498
1513	1.4	12.5811	6.72151	-5.72437	13.661	7.29624	-5.74917				13.749	7.18953	-5.74746	14.3773	7.6439	-5.76438	14.529	7.65667	-5.69832	14.6173	7.516	-5.87295	14.4588	7.7783	-5.53312
1514	1.402	12.5678	6.72041	-5.72161	13.6405	7.28377	-5.74645				13.7354	7.17858	-5.74125	14.3602	7.6407	-5.77469	14.5057	7.6549	-5.70921	14.6028	7.5201	-5.89056	14.43	7.77126	-5.53629
1515	1.404	12.5597	6.72048	-5.7204	13.626	7.27336	-5.747				13.75	7.18896	-5.759	14.3373	7.63247	-5.78553	14.487	7.65531	-5.72034	14.5722	7.52002	-5.90253	14.4039	7.77801	-5.54437
1516	1.406	12.5422	6.71765	-5.71729	13.609	7.26198	-5.74965				13.7231	7.16734	-5.75081	14.3282	7.638	-5.794	14.4706	7.65598	-5.73172	14.5506	7.5144	-5.90572	14.4035	7.79215	-5.5682
1517	1.408	12.5161	6.70172	-5.71179	13.6037	7.26057	-5.75012				13.7102	7.15629	-5.75247	14.2748	7.62576	-5.79498	14.4567	7.65839	-5.74329	14.5451	7.52004	-5.92699	14.3689	7.78036	-5.57248
1518	1.41	12.4822	6.68401	-5.70121	13.588	7.24947	-5.74879				NaN	NaN	NaN	14.2821	7.6331	-5.81712	14.4468	7.66358	-5.75934	14.5484	7.52594	-5.95054	14.3409	7.77141	-5.5756
1519	1.412	12.4657	6.68195	-5.69688	13.5646	7.23508	-5.7489				NaN	NaN	NaN	14.2618	7.63744	-5.82231	14.4294	7.66346	-5.76984	14.5136	7.52598	-5.95888	14.3324	7.77531	-5.58488
1520	1.414	12.4495	6.67511	-5.69549	13.5465	7.22255	-5.74645				NaN	NaN	NaN	14.267	7.64612	-5.83745	14.4015	7.66036	-5.78208	14.4759	7.52382	-5.9613	14.3286	7.77762	-5.60069
1521	1.416	12.4357	6.67468	-5.69063	13.5336	7.21237	-5.74538				NaN	NaN	NaN	14.2514	7.64902	-5.85124	14.3939	7.66921	-5.7944	NaN	NaN	NaN	14.3221	7.7809	-5.62758
1522	1.418	12.4183	6.66734	-5.69068	13.5309	7.21067	-5.74723				NaN	NaN	NaN	14.2277	7.65164	-5.85871	14.3628	7.66037	-5.79759	NaN	NaN	NaN	14.3038	7.78225	-5.62621
1523	1.42	12.4033	6.66607	-5.68489	13.5099	7.19644	-5.74642				NaN	NaN	NaN	14.2263	7.65784	-5.86875	14.3417	7.65731	-5.80841	NaN	NaN	NaN	14.2852	7.78187	-5.63606
1524	1.422	12.3906	6.66293	-5.69511	13.494	7.18368	-5.74397				NaN	NaN	NaN	14.197	7.65603	-5.87639	14.3223	7.65835	-5.82406	NaN	NaN	NaN	14.2756	7.78925	-5.65566
1525	1.424	12.3745	6.66058	-5.6888	13.4757	7.17111	-5.74492				NaN	NaN	NaN	14.2062	7.67447	-5.89174	14.3068	7.6593	-5.83473	NaN	NaN	NaN	14.2235	7.77147	-5.64685
1526	1.426	12.3652	6.66433	-5.68734	13.4682	7.16637	-5.74312				NaN	NaN	NaN	14.1907	7.66826	-5.904	14.2913	7.66045	-5.84683	NaN	NaN	NaN	14.2048	7.77261	-5.66115
1527	1.428	12.3516	6.65966	-5.68844	13.454	7.15555	-5.74431				NaN	NaN	NaN	14.1527	7.6594	-5.90772	14.2701	7.66082	-5.86405	NaN	NaN	NaN	14.196	7.77893	-5.67035
1528	1.43	12.323	6.64737	-5.67881	13.4327	7.13749	-5.74125				NaN	NaN	NaN	14.1448	7.66306	-5.92228	14.2339	7.65873	-5.87155	NaN	NaN	NaN	14.1661	7.77745	-5.68104
1529	1.432	12.2995	6.64026	-5.67744	13.4343	7.1375	-5.74523				NaN	NaN	NaN	14.1121	7.66082	-5.92738	14.2293	7.66338	-5.88707	NaN	NaN	NaN	14.1501	7.77083	-5.68826
1530	1.434	12.2846	6.63545	-5.67633	13.4263	7.13386	-5.74407				NaN	NaN	NaN	14.076	7.65538	-5.9246	14.1955	7.65396	-5.89395	NaN	NaN	NaN	14.128	7.77973	-5.69743
1531	1.436	12.2748	6.63816	-5.67221	13.4043	7.11844	-5.74076				NaN	NaN	NaN	14.0731	7.65712	-5.94257	14.1878	7.66107	-5.91257	NaN	NaN	NaN	14.0977	7.77309	-5.7046
1532	1.438	12.2579	6.63157	-5.67167	13.3999	7.11487	-5.741				NaN	NaN	NaN	14.039	7.65679	-5.9445	14.1665	7.66271	-5.91924	NaN	NaN	NaN	14.0804	7.77068	-5.71451
1533	1.44	12.2377	6.62601	-5.66671	13.3775	7.09622	-5.73658				NaN	NaN	NaN	14.0526	7.6754	-5.96654	14.1295	7.66125	-5.92081	NaN	NaN	NaN	14.067	7.77222	-5.72879
1534	1.442	12.2269	6.6297	-5.66392	13.3609	7.08383	-5.73662				NaN	NaN	NaN	14.037	7.66937	-5.9746	14.1075	7.65941	-5.93031	NaN	NaN	NaN	14.0488	7.77316	-5.73146
1535	1.444	12.2235	6.63484	-5.66533	13.3558	7.08047	-5.73589				NaN	NaN	NaN	13.9976	7.66708	-5.9889	14.1073	7.67279	-5.95467	NaN	NaN	NaN	14.0243	7.77084	-5.73753
1536	1.446	12.1919	6.62116	-5.6565	13.337	7.0674	-5.73148				NaN	NaN	NaN	13.9409	7.65309	-5.98197	14.082	7.66826	-5.96224	NaN	NaN	NaN	14.0116	7.77163	-5.74802
1537	1.448	12.1699	6.61277	-5.64937	13.3413	7.07055	-5.73193				NaN	NaN	NaN	13.8959	7.6353	-5.97702	14.0283	7.64641	-5.95514	NaN	NaN	NaN	13.9938	7.77608	-5.75643
1538	1.45	12.1558	6.6128	-5.64686	13.3115	7.04763	-5.72827				NaN	NaN	NaN	13.9029	7.64499	-5.99605	13.9913	7.64113	-5.96568	NaN	NaN	NaN	13.9593	7.76586	-5.75861
1539	1.452	12.1484	6.61332	-5.64614	13.2838	7.02482	-5.71985				NaN	NaN	NaN	13.7892	7.60883	-5.96345	13.9806	7.63751	-5.99411	NaN	NaN	NaN	13.9389	7.76135	-5.77416
1540	1.454	12.1387	6.61723	-5.63824	13.2927	7.02482	-5.72879				NaN	NaN	NaN	13.826	7.62141	-6.00142	13.9764	7.64286	-6.00682	NaN	NaN	NaN	13.9251	7.76229	-5.78067
1541	1.456	12.1271	6.61851	-5.64137	13.2701	7.01482	-5.71971				NaN	NaN	NaN	13.7653	7.60236	-5.99658	13.9415	7.63493	-6.00835	NaN	NaN	NaN	13.8849	7.75274	-5.78362
1542	1.458	12.1113	6.61796	-5.63865	13.2545	7.00217	-5.71757				NaN	NaN	NaN	13.7324	7.59388	-5.997	13.9051	7.62046	-6.01145	NaN	NaN	NaN	13.8637	7.75182	-5.79675
1543	1.46	12.105	6.61856	-5.63866	13.2434	6.99278	-5.71509				NaN	NaN	NaN	13.7028	7.58256	-6.0006	13.892	7.61802	-6.02795	NaN	NaN	NaN	13.8443	7.7485	-5.79789
1544	1.462	12.0786	6.60905	-5.63128							NaN	NaN	NaN	13.6925	7.5829	-6.00884				NaN	NaN	NaN	13.8108	7.74531	-5.79848
1545	1.464	12.064	6.60726	-5.62522							NaN	NaN	NaN	13.6494	7.56892	-6.00896				NaN	NaN	NaN	13.7846	7.73834	-5.80527
1546	1.466	12.0449	6.60245	-5.6209							NaN	NaN	NaN	13.638	7.55643	-6.02508				NaN	NaN	NaN	13.7688	7.73317	-5.81312
1547	1.468	12.0278	6.59915	-5.61458							NaN	NaN	NaN	13.5975	7.54092	-6.02245				NaN	NaN	NaN	13.7578	7.73156	-5.81866
1548	1.47	12.0097	6.59112	-5.61194							NaN	NaN	NaN	13.5547	7.52731	-6.02065				NaN	NaN	NaN	13.7259	7.72162	-5.82766
1549	1.472	11.9944	6.58954	-5.60902							NaN	NaN	NaN	13.5574	7.53011	-6.0244				NaN	NaN	NaN	13.692	7.71157	-5.83569
1550	1.474	11.9789	6.58776	-5.60134							NaN	NaN	NaN	13.5733	7.53626	-6.05081				NaN	NaN	NaN	13.6795	7.71026	-5.8332
1551	1.476	11.9614	6.58275	-5.59333							NaN	NaN	NaN	13.5346	7.52747	-6.03727				NaN	NaN	NaN	13.6612	7.70278	-5.82857
1552	1.478	11.9364	6.57036	-5.58717							NaN	NaN	NaN	13.5165	7.51625	-6.0396				NaN	NaN	NaN	13.642	7.69624	-5.83649
1553	1.48	11.9188	6.55963	-5.5779							NaN	NaN	NaN	13.5035	7.5093	-6.04029				NaN	NaN	NaN	13.6321	7.6935	-5.83849
1554	1.482	11.8924	6.54716	-5.57032							NaN	NaN	NaN	13.5012	7.51195	-6.04782				NaN	NaN	NaN	13.6039	7.68493	-5.83551
1555	1.484	11.8768	6.54417	-5.56583							NaN	NaN	NaN	13.4912	7.50325	-6.05292				NaN	NaN	NaN	13.5926	7.6752	-5.84065
1556	1.486	11.8628	6.54121	-5.56113							NaN	NaN	NaN	13.4326	7.4801	-6.03835				NaN	NaN	NaN	13.5582	7.66394	-5.8375
1557	1.488	11.8502	6.53894	-5.55743							NaN	NaN	NaN	13.4596	7.48871	-6.04596				NaN	NaN	NaN	13.5299	7.65156	-5.8253
1558	1.49	11.8374	6.53612	-5.55316							NaN	NaN	NaN	13.4193	7.46877	-6.0318				NaN	NaN	NaN	13.4989	7.63892	-5.82826
1559	1.492	11.8242	6.53243	-5.5481							NaN	NaN	NaN	13.418	7.45717	-6.04001				NaN	NaN	NaN	13.4932	7.6374	-5.83389
1560	1.494	11.8102	6.5289	-5.54289							NaN	NaN	NaN	13.3804	7.43507	-6.0227				NaN	NaN	NaN	13.4773	7.62629	-5.83618
1561	1.496	11.7932	6.52422	-5.53514							NaN	NaN	NaN	13.4028	7.43909	-6.03642				NaN	NaN	NaN	13.4635	7.62409	-5.82696
1562	1.498	11.7799	6.52011	-5.53188							NaN	NaN	NaN	NaN	NaN	NaN				NaN	NaN	NaN	13.4516	7.61947	-5.82619
1563	1.5	11.7663	6.5157	-5.52771							NaN	NaN	NaN	NaN	NaN	NaN				NaN	NaN	NaN	13.4305	7.60917	-5.83009
1564	1.502	11.7524	6.51174	-5.52196							NaN	NaN	NaN	NaN	NaN	NaN				NaN	NaN	NaN	13.4139	7.59948	-5.83043
1565	1.504	11.7372	6.50653	-5.51523							NaN	NaN	NaN	NaN	NaN	NaN				NaN	NaN	NaN	13.4021	7.59564	-5.82788
1566	1.506	11.7074	6.49045	-5.50576							NaN	NaN	NaN	NaN	NaN	NaN				NaN	NaN	NaN	13.3803	7.58245	-5.83313
1567	1.508	11.6921	6.4845	-5.4982							NaN	NaN	NaN	NaN	NaN	NaN				NaN	NaN	NaN	13.3837	7.5837	-5.83775
1568	1.51	11.6995	6.49855	-5.49808							NaN	NaN	NaN	NaN	NaN	NaN				NaN	NaN	NaN	13.3514	7.57396	-5.83147
1569	1.512	11.6859	6.49355	-5.49154							NaN	NaN	NaN	NaN	NaN	NaN				NaN	NaN	NaN	13.339	7.559	-5.83029
1570	1.514	11.6592	6.4776	-5.48306							NaN	NaN	NaN	NaN	NaN	NaN				NaN	NaN	NaN	13.328	7.55511	-5.83231
1571	1.516	11.6388	6.46968	-5.47367							NaN	NaN	NaN	NaN	NaN	NaN				NaN	NaN	NaN	13.3188	7.53773	-5.83429
1572	1.518	11.6246	6.46422	-5.4679							NaN	NaN	NaN	NaN	NaN	NaN				NaN	NaN	NaN	13.3504	7.557	-5.85591
1573	1.52	11.6049	6.45659	-5.45837							NaN	NaN	NaN	NaN	NaN	NaN				NaN	NaN	NaN	13.3141	7.52728	-5.84454
1574	1.522	11.5947	6.45066	-5.45387							NaN	NaN	NaN	NaN	NaN	NaN				NaN	NaN	NaN	13.3426	7.53494	-5.85616
1575	1.524	11.5808	6.44343	-5.4469							NaN	NaN	NaN	NaN	NaN	NaN				NaN	NaN	NaN	13.3324	7.5124	-5.85057
1576	1.526	11.5769	6.44639	-5.4442							NaN	NaN	NaN	NaN	NaN	NaN				NaN	NaN	NaN	13.3115	7.48628	-5.8381
1577	1.528	11.5767	6.45168	-5.44032							NaN	NaN	NaN	NaN	NaN	NaN				NaN	NaN	NaN	13.3016	7.47045	-5.82703
1578	1.53	11.5624	6.44413	-5.43685							NaN	NaN	NaN	NaN	NaN	NaN				NaN	NaN	NaN	13.3059	7.45485	-5.82968
1579	1.532	11.5352	6.42484	-5.42682							NaN	NaN	NaN	NaN	NaN	NaN				NaN	NaN	NaN	13.307	7.43684	-5.82635
1580	1.534	11.511	6.41464	-5.41349							NaN	NaN	NaN	NaN	NaN	NaN				NaN	NaN	NaN	13.29	7.4156	-5.82184
1581	1.536	11.4801	6.39491	-5.40033							NaN	NaN	NaN	NaN	NaN	NaN				NaN	NaN	NaN	13.2612	7.3918	-5.80656
1582	1.538	11.4742	6.39386	-5.40405							NaN	NaN	NaN	NaN	NaN	NaN				NaN	NaN	NaN	13.2488	7.37345	-5.7973
1583	1.54	11.4622	6.38624	-5.39538							NaN	NaN	NaN	NaN	NaN	NaN				NaN	NaN	NaN	13.2642	7.35987	-5.80659
1584	1.542	11.4502	6.38534	-5.38782							NaN	NaN	NaN	NaN	NaN	NaN				NaN	NaN	NaN	13.2643	7.34741	-5.80213
1585	1.544	11.4217	6.36799	-5.3768							NaN	NaN	NaN	NaN	NaN	NaN				NaN	NaN	NaN	13.267	7.33666	-5.80236
1586	1.546	11.415	6.36171	-5.37125							NaN	NaN	NaN	NaN	NaN	NaN				NaN	NaN	NaN	13.2511	7.31312	-5.79524
1587	1.548	11.4088	6.36557	-5.36403							NaN	NaN	NaN	NaN	NaN	NaN				NaN	NaN	NaN	13.2742	7.31263	-5.80282
1588	1.55	11.3904	6.35627	-5.36572							NaN	NaN	NaN	NaN	NaN	NaN				13.1597	7.04468	-6.15697	13.2762	7.29906	-5.79663
1589	1.552	11.3669	6.35158	-5.35555							NaN	NaN	NaN	NaN	NaN	NaN				13.1795	7.03689	-6.16258	13.2639	7.27685	-5.78748
1590	1.554	11.3609	6.34603	-5.35221							NaN	NaN	NaN	NaN	NaN	NaN				13.1859	7.02843	-6.16681	13.239	7.24542	-5.77487
1591	1.556	11.3597	6.3447	-5.34733							NaN	NaN	NaN	NaN	NaN	NaN				13.1728	7.00342	-6.15876	13.2596	7.24182	-5.78012
1592	1.558	11.3464	6.34082	-5.3406							NaN	NaN	NaN	NaN	NaN	NaN				13.1784	6.99143	-6.16166	13.2458	7.22293	-5.76948
1593	1.56	11.3399	6.33635	-5.33101							NaN	NaN	NaN	NaN	NaN	NaN				13.1631	6.97804	-6.14876	13.2275	7.19824	-5.75871
1594	1.562	11.3127	6.32798	-5.31781							NaN	NaN	NaN	NaN	NaN	NaN				NaN	NaN	NaN	13.2459	7.18994	-5.76494
1595	1.564	11.2942	6.31925	-5.30892							NaN	NaN	NaN	NaN	NaN	NaN				NaN	NaN	NaN	13.2375	7.17303	-5.75165
1596	1.566	11.2874	6.31299	-5.30506							NaN	NaN	NaN	NaN	NaN	NaN				NaN	NaN	NaN	13.2243	7.15716	-5.74472
1597	1.568	11.285	6.31134	-5.29796							NaN	NaN	NaN	NaN	NaN	NaN				NaN	NaN	NaN	13.1938	7.1247	-5.72869
1598	1.57	11.256	6.30284	-5.27857							NaN	NaN	NaN	NaN	NaN	NaN				NaN	NaN	NaN	13.1896	7.10354	-5.72456
1599	1.572	11.2531	6.30007	-5.27617							NaN	NaN	NaN	NaN	NaN	NaN				NaN	NaN	NaN	13.158	7.07752	-5.70738
1600	1.574	11.2342	6.29096	-5.26766							NaN	NaN	NaN	NaN	NaN	NaN				NaN	NaN	NaN	13.1386	7.05549	-5.69796
1601	1.576	11.2293	6.28633	-5.26327							NaN	NaN	NaN	NaN	NaN	NaN				NaN	NaN	NaN	13.1548	7.04664	-5.70313
1602	1.578	11.2013	6.27767	-5.24542							NaN	NaN	NaN	NaN	NaN	NaN				NaN	NaN	NaN	13.1352	7.02331	-5.69249
1603	1.58	11.1837	6.26071	-5.2257							NaN	NaN	NaN	NaN	NaN	NaN				NaN	NaN	NaN	13.1416	7.01518	-5.69234
1604	1.582	11.1818	6.25874	-5.22052							NaN	NaN	NaN	NaN	NaN	NaN				NaN	NaN	NaN	13.1224	6.9945	-5.68127
1605	1.584	11.1699	6.25596	-5.21321							NaN	NaN	NaN	NaN	NaN	NaN				NaN	NaN	NaN	13.0897	6.971	-5.66412
1606	1.586	11.1628	6.25528	-5.20628							NaN	NaN	NaN	NaN	NaN	NaN				NaN	NaN	NaN	13.0865	6.96052	-5.65979
1607	1.588	11.1482	6.24655	-5.20283							NaN	NaN	NaN	NaN	NaN	NaN				NaN	NaN	NaN	13.0793	6.94652	-5.65371
1608	1.59	11.1307	6.23675	-5.18406							NaN	NaN	NaN	NaN	NaN	NaN				NaN	NaN	NaN	13.0622	6.92518	-5.64332
1609	1.592	11.1049	6.21902	-5.17068							NaN	NaN	NaN	NaN	NaN	NaN				NaN	NaN	NaN	13.0713	6.9233	-5.64466
1610	1.594	11.0715	6.19358	-5.15139							NaN	NaN	NaN	NaN	NaN	NaN				NaN	NaN	NaN	13.0661	6.90994	-5.64128
1611	1.596	11.071	6.20035	-5.1527							NaN	NaN	NaN	NaN	NaN	NaN				NaN	NaN	NaN	13.0533	6.89349	-5.63587
1612	1.598	11.0532	6.19157	-5.14003							NaN	NaN	NaN	NaN	NaN	NaN				NaN	NaN	NaN	13.023	6.86839	-5.62276
1613	1.6	11.0424	6.18804	-5.1342							NaN	NaN	NaN	NaN	NaN	NaN				NaN	NaN	NaN	13.0086	6.85283	-5.6164
1614	1.602	11.0294	6.18409	-5.12196							NaN	NaN	NaN	NaN	NaN	NaN				NaN	NaN	NaN	12.9993	6.83673	-5.60946
1615	1.604	11.0121	6.17502	-5.1117							NaN	NaN	NaN	NaN	NaN	NaN				NaN	NaN	NaN	12.9981	6.82436	-5.60894
1616	1.606	10.9932	6.16606	-5.10242							NaN	NaN	NaN	NaN	NaN	NaN				NaN	NaN	NaN	12.9659	6.79387	-5.59469
1617	1.608	10.9816	6.1631	-5.09238							NaN	NaN	NaN	NaN	NaN	NaN				NaN	NaN	NaN	12.9668	6.78436	-5.59411
1618	1.61	10.9739	6.16365	-5.0808							NaN	NaN	NaN	NaN	NaN	NaN				NaN	NaN	NaN	12.9612	6.78166	-5.59361
1619	1.612	10.9616	6.16092	-5.07262							NaN	NaN	NaN	NaN	NaN	NaN				NaN	NaN	NaN	12.972	6.77559	-5.59757
1620	1.614	10.9447	6.15243	-5.06223							NaN	NaN	NaN	NaN	NaN	NaN				NaN	NaN	NaN	12.931	6.75464	-5.58844
1621	1.616	10.9329	6.14901	-5.05201							NaN	NaN	NaN	NaN	NaN	NaN				NaN	NaN	NaN	12.9317	6.74664	-5.58419
1622	1.618	10.9209	6.14648	-5.04323							NaN	NaN	NaN	NaN	NaN	NaN				NaN	NaN	NaN	12.8973	6.72694	-5.57042
1623	1.62	10.9038	6.13863	-5.03356							NaN	NaN	NaN	NaN	NaN	NaN				NaN	NaN	NaN	12.8838	6.7158	-5.56719
1624	1.622	10.8885	6.13212	-5.02527							NaN	NaN	NaN	NaN	NaN	NaN				NaN	NaN	NaN	12.8751	6.71003	-5.56541
1625	1.624	10.8785	6.13125	-5.0135							NaN	NaN	NaN	NaN	NaN	NaN				NaN	NaN	NaN	12.8557	6.69405	-5.55873
1626	1.626	10.8877	6.14775	-5.01084							NaN	NaN	NaN	NaN	NaN	NaN				NaN	NaN	NaN	12.8451	6.68343	-5.5552
1627	1.628	10.889	6.15771	-5.00792							NaN	NaN	NaN	NaN	NaN	NaN				NaN	NaN	NaN	12.8221	6.67458	-5.55045
1628	1.63	10.8697	6.14783	-4.99744							NaN	NaN	NaN	NaN	NaN	NaN				NaN	NaN	NaN	12.8106	6.6648	-5.54624
1629	1.632	10.8311	6.12039	-4.98101							NaN	NaN	NaN	NaN	NaN	NaN				NaN	NaN	NaN	12.7963	6.65465	-5.543
1630	1.634	10.8132	6.11245	-4.97047							NaN	NaN	NaN	NaN	NaN	NaN				NaN	NaN	NaN	12.7739	6.64149	-5.53709
1631	1.636	10.8015	6.11089	-4.96003							NaN	NaN	NaN	NaN	NaN	NaN				NaN	NaN	NaN	12.7505	6.63033	-5.5356
1632	1.638	10.7825	6.1034	-4.94947							NaN	NaN	NaN	NaN	NaN	NaN				NaN	NaN	NaN	12.7379	6.62836	-5.52878
1633	1.64	10.7624	6.0969	-4.93646							NaN	NaN	NaN	NaN	NaN	NaN				NaN	NaN	NaN	12.7247	6.62407	-5.53301
1634	1.642	10.7551	6.10108	-4.9279							NaN	NaN	NaN	NaN	NaN	NaN				NaN	NaN	NaN	12.705	6.61623	-5.53159
1635	1.644	10.741	6.09768	-4.91985							NaN	NaN	NaN	NaN	NaN	NaN				NaN	NaN	NaN	12.689	6.61103	-5.5266
1636	1.646	10.7276	6.09685	-4.90607							NaN	NaN	NaN	NaN	NaN	NaN				NaN	NaN	NaN	12.671	6.60451	-5.52646
1637	1.648	10.7222	6.10303	-4.89865							NaN	NaN	NaN	NaN	NaN	NaN				NaN	NaN	NaN	12.6354	6.59666	-5.51931
1638	1.65	10.7056	6.09728	-4.88931							NaN	NaN	NaN	NaN	NaN	NaN				NaN	NaN	NaN	12.6139	6.5906	-5.51868
1639	1.652	10.6869	6.09134	-4.87945							NaN	NaN	NaN	NaN	NaN	NaN				NaN	NaN	NaN	12.6218	6.5973	-5.52449
1640	1.654	10.6755	6.09213	-4.86805							NaN	NaN	NaN	NaN	NaN	NaN				NaN	NaN	NaN	12.5946	6.58977	-5.52241
1641	1.656	10.6815	6.11075	-4.86813							NaN	NaN	NaN	NaN	NaN	NaN				NaN	NaN	NaN	12.5647	6.58833	-5.52137
1642	1.658	10.6644	6.10746	-4.85657							NaN	NaN	NaN	NaN	NaN	NaN				NaN	NaN	NaN	12.5632	6.59736	-5.52432
1643	1.66	10.6363	6.0911	-4.84127							NaN	NaN	NaN	NaN	NaN	NaN				NaN	NaN	NaN	12.5467	6.59977	-5.52201
1644	1.662	10.6044	6.07192	-4.83175							NaN	NaN	NaN	NaN	NaN	NaN				NaN	NaN	NaN	12.5165	6.59958	-5.5249
1645	1.664	10.5533	6.05365	-4.81328							NaN	NaN	NaN	NaN	NaN	NaN				NaN	NaN	NaN	12.5005	6.60665	-5.52485
1646	1.666	10.5519	6.0664	-4.8047							NaN	NaN	NaN	NaN	NaN	NaN				12.3312	6.30431	-5.85313	12.5034	6.62326	-5.53549
1647	1.668	10.5496	6.07824	-4.79318							NaN	NaN	NaN	NaN	NaN	NaN				12.3502	6.33073	-5.86951	12.4875	6.63003	-5.53661
1648	1.67	10.5229	6.06716	-4.78121							NaN	NaN	NaN	NaN	NaN	NaN				12.3422	6.3418	-5.88115	12.4554	6.62262	-5.5318
1649	1.672	10.5064	6.06522	-4.77027							NaN	NaN	NaN	NaN	NaN	NaN				12.2854	6.33238	-5.86624	12.4531	6.63784	-5.53876
1650	1.674	10.4922	6.06659	-4.76048							NaN	NaN	NaN	NaN	NaN	NaN				12.274	6.3425	-5.87402	12.4347	6.6378	-5.54143
1651	1.676	10.4713	6.06126	-4.74654							NaN	NaN	NaN	NaN	NaN	NaN				12.2381	6.33976	-5.87194	12.4154	6.64267	-5.53749
1652	1.678	10.4534	6.05973	-4.73434							NaN	NaN	NaN	NaN	NaN	NaN				12.243	6.36088	-5.88017	NaN	NaN	NaN
1653	1.68	10.4454	6.06689	-4.7267							NaN	NaN	NaN	NaN	NaN	NaN				12.2042	6.36091	-5.87367	NaN	NaN	NaN
1654	1.682	10.4487	6.07975	-4.72531							NaN	NaN	NaN	NaN	NaN	NaN				12.1751	6.36826	-5.86656	NaN	NaN	NaN
1655	1.684	10.4459	6.08528	-4.71816							NaN	NaN	NaN	NaN	NaN	NaN				12.1566	6.38006	-5.86927	NaN	NaN	NaN
1656	1.686	10.4441	6.08869	-4.71062							NaN	NaN	NaN	NaN	NaN	NaN				12.1213	6.38779	-5.8614	NaN	NaN	NaN
1657	1.688	10.404	6.07816	-4.687							NaN	NaN	NaN	NaN	NaN	NaN				12.1267	6.40693	-5.881	NaN	NaN	NaN
1658	1.69	10.394	6.07672	-4.67806							NaN	NaN	NaN	NaN	NaN	NaN				12.0777	6.39862	-5.87141	NaN	NaN	NaN
1659	1.692	10.3843	6.07605	-4.66962							NaN	NaN	NaN	NaN	NaN	NaN				12.0648	6.40092	-5.87218	NaN	NaN	NaN
1660	1.694	10.3773	6.07643	-4.66123							NaN	NaN	NaN	NaN	NaN	NaN				12.0164	6.39931	-5.8645	NaN	NaN	NaN
1661	1.696	10.377	6.07665	-4.65277							NaN	NaN	NaN	NaN	NaN	NaN				12.0019	6.40884	-5.87342	NaN	NaN	NaN
1662	1.698	10.3752	6.07958	-4.64837							NaN	NaN	NaN	NaN	NaN	NaN				11.9935	6.417	-5.87002	NaN	NaN	NaN
1663	1.7	10.374	6.08321	-4.64271							NaN	NaN	NaN	NaN	NaN	NaN				11.9653	6.4196	-5.87734	NaN	NaN	NaN
1664	1.702	10.3703	6.08707	-4.63404							NaN	NaN	NaN	NaN	NaN	NaN				11.94	6.43042	-5.87987	NaN	NaN	NaN
1665	1.704	10.3644	6.09178	-4.62646							NaN	NaN	NaN	NaN	NaN	NaN				11.892	6.42162	-5.86817	NaN	NaN	NaN
1666	1.706	10.3455	6.08582	-4.61203							NaN	NaN	NaN	NaN	NaN	NaN				11.8901	6.43868	-5.8767	NaN	NaN	NaN
1667	1.708	10.3191	6.08376	-4.59069							NaN	NaN	NaN	NaN	NaN	NaN	11.9173	6.59131	-5.69161	11.8361	6.44213	-5.86492	NaN	NaN	NaN
1668	1.71	10.2945	6.08399	-4.57965							NaN	NaN	NaN	NaN	NaN	NaN	11.911	6.60553	-5.69856	11.7908	6.43445	-5.84639	NaN	NaN	NaN
1669	1.712	10.2744	6.08011	-4.56543							NaN	NaN	NaN	NaN	NaN	NaN	11.8918	6.61746	-5.71002	11.7917	6.45044	-5.85875	NaN	NaN	NaN
1670	1.714	10.2594	6.08053	-4.55753							NaN	NaN	NaN	NaN	NaN	NaN	11.8558	6.6072	-5.70874	11.7416	6.44313	-5.85055	NaN	NaN	NaN
1671	1.716	10.2437	6.08071	-4.54366							NaN	NaN	NaN	NaN	NaN	NaN	11.8376	6.61291	-5.70539	11.7191	6.44005	-5.83673	NaN	NaN	NaN
1672	1.718	10.2413	6.09126	-4.53526							NaN	NaN	NaN	NaN	NaN	NaN	11.8125	6.61212	-5.69795	11.675	6.43674	-5.82439	NaN	NaN	NaN
1673	1.72	10.2284	6.09458	-4.52755							NaN	NaN	NaN	NaN	NaN	NaN	11.767	6.60375	-5.68545	11.6726	6.45283	-5.83946	NaN	NaN	NaN
1674	1.722	10.2052	6.08304	-4.51054							NaN	NaN	NaN	NaN	NaN	NaN	11.7419	6.61299	-5.6814	11.6316	6.44413	-5.83242	NaN	NaN	NaN
1675	1.724	10.1944	6.0878	-4.50183							NaN	NaN	NaN	NaN	NaN	NaN	11.7253	6.61623	-5.67454	11.5657	6.43585	-5.81005	NaN	NaN	NaN
1676	1.726	10.1792	6.08791	-4.49166							NaN	NaN	NaN	NaN	NaN	NaN	11.701	6.61329	-5.67114	11.5459	6.44653	-5.80392	NaN	NaN	NaN
1677	1.728	10.1674	6.08797	-4.47941							NaN	NaN	NaN	NaN	NaN	NaN	11.6951	6.62528	-5.67591	11.5513	6.46487	-5.8141	NaN	NaN	NaN
1678	1.73	10.1509	6.08641	-4.46427							NaN	NaN	NaN	NaN	NaN	NaN	11.6429	6.61361	-5.65553	11.532	6.46313	-5.81532	NaN	NaN	NaN
1679	1.732	10.1421	6.08962	-4.45501							NaN	NaN	NaN	NaN	NaN	NaN	11.6212	6.61659	-5.64942	11.5028	6.47045	-5.79781	NaN	NaN	NaN
1680	1.734	10.1254	6.08772	-4.44291							NaN	NaN	NaN	NaN	NaN	NaN	11.6292	6.62695	-5.66005	11.4896	6.4694	-5.7984	NaN	NaN	NaN
1681	1.736	10.1145	6.08803	-4.43094							NaN	NaN	NaN	NaN	NaN	NaN	11.5834	6.61496	-5.63985	11.4462	6.46578	-5.78117	NaN	NaN	NaN
1682	1.738	10.0985	6.08743	-4.41918							NaN	NaN	NaN	NaN	NaN	NaN	11.5864	6.62872	-5.65	11.4751	6.49139	-5.79702	NaN	NaN	NaN
1683	1.74	10.0869	6.08734	-4.40787							NaN	NaN	NaN	NaN	NaN	NaN	11.556	6.62196	-5.63799	11.4535	6.49945	-5.79183	NaN	NaN	NaN
1684	1.742	10.0702	6.08688	-4.39527							NaN	NaN	NaN	NaN	NaN	NaN	11.5383	6.61817	-5.62907	11.422	6.49251	-5.77635	NaN	NaN	NaN
1685	1.744	10.059	6.08593	-4.38081							NaN	NaN	NaN	11.3717	6.56625	-5.50839	11.5341	6.62872	-5.62935	11.3875	6.4914	-5.76138	NaN	NaN	NaN
1686	1.746	10.0514	6.0903	-4.37082							NaN	NaN	NaN	11.3653	6.56509	-5.50728	11.5139	6.62688	-5.61701	11.3568	6.4846	-5.75714	NaN	NaN	NaN
1687	1.748	10.0336	6.08704	-4.35876							NaN	NaN	NaN	11.3542	6.56096	-5.49992	11.4803	6.61882	-5.60507	11.3206	6.47457	-5.73904	NaN	NaN	NaN
1688	1.75	10.0222	6.08556	-4.34552							NaN	NaN	NaN	11.333	6.55219	-5.48945	11.4437	6.60514	-5.58799	11.3295	6.48987	-5.74438	NaN	NaN	NaN
1689	1.752	10.006	6.08351	-4.33314							NaN	NaN	NaN	11.3176	6.54205	-5.48281	11.4281	6.60799	-5.58077	11.3018	6.48369	-5.7362	NaN	NaN	NaN
1690	1.754	9.99942	6.0868	-4.32251							NaN	NaN	NaN	11.2743	6.516	-5.45989	11.4028	6.60213	-5.5719	11.2884	6.48242	-5.72817	NaN	NaN	NaN
1691	1.756	9.97988	6.08151	-4.31187							NaN	NaN	NaN	11.2467	6.50958	-5.44655	11.3862	6.59821	-5.56732	11.2585	6.48149	-5.71938	NaN	NaN	NaN
1692	1.758	9.97133	6.08223	-4.29902							NaN	NaN	NaN	11.2383	6.49376	-5.43562	11.3689	6.59422	-5.54673	11.2171	6.46905	-5.7034	NaN	NaN	NaN
1693	1.76	9.96655	6.08769	-4.28577							NaN	NaN	NaN	11.2271	6.48695	-5.43058	11.3459	6.57217	-5.53505	11.1972	6.46779	-5.69488	NaN	NaN	NaN
1694	1.762	9.95079	6.08666	-4.27332							NaN	NaN	NaN	11.2237	6.48647	-5.42704	11.3363	6.57476	-5.52889	11.1748	6.47312	-5.6907	NaN	NaN	NaN
1695	1.764	9.93875	6.08465	-4.25982							NaN	NaN	NaN	11.2049	6.4701	-5.41875	11.3333	6.56558	-5.52413	11.1796	6.47606	-5.68908	NaN	NaN	NaN
1696	1.766	9.92222	6.08261	-4.24658							NaN	NaN	NaN	11.2164	6.47014	-5.42106	11.3266	6.56616	-5.52161	11.1554	6.47688	-5.68036	NaN	NaN	NaN
1697	1.768	9.91104	6.08094	-4.23051							NaN	NaN	NaN	11.2119	6.46125	-5.42043	11.3007	6.55359	-5.50638	11.1485	6.47798	-5.68048	NaN	NaN	NaN
1698	1.77	9.90124	6.08021	-4.21835							NaN	NaN	NaN	11.2266	6.46187	-5.42616	11.2895	6.54617	-5.49995	11.1458	6.4951	-5.67808	NaN	NaN	NaN
1699	1.772	9.89182	6.0802	-4.20549							NaN	NaN	NaN	11.21	6.44675	-5.41424	11.2707	6.53306	-5.49211	11.1068	6.47949	-5.66026	NaN	NaN	NaN
1700	1.774	9.87311	6.07441	-4.18925							NaN	NaN	NaN	11.1904	6.42794	-5.40288	11.2691	6.5265	-5.48518	11.1011	6.47759	-5.65258	NaN	NaN	NaN
1701	1.776	9.86348	6.07389	-4.17756							NaN	NaN	NaN	11.1745	6.41279	-5.39701	11.252	6.51233	-5.47939	11.0747	6.46308	-5.63004	NaN	NaN	NaN
1702	1.778	9.85106	6.07015	-4.16229							NaN	NaN	NaN	11.1697	6.39146	-5.38747	11.2057	6.48439	-5.4507	11.0676	6.46267	-5.61664	NaN	NaN	NaN
1703	1.78	9.84137	6.06983	-4.15067							NaN	NaN	NaN	11.1673	6.37758	-5.38302	11.2255	6.48226	-5.46053	11.0505	6.46278	-5.61064	NaN	NaN	NaN
1704	1.782	9.82577	6.06626	-4.13518							NaN	NaN	NaN	11.1452	6.36127	-5.36915	11.2147	6.4749	-5.45529	11.0437	6.45003	-5.6011	NaN	NaN	NaN
1705	1.784	9.81644	6.06581	-4.12262							NaN	NaN	NaN	11.1579	6.35385	-5.37083	11.2101	6.47074	-5.4554	11.0408	6.44235	-5.60041	NaN	NaN	NaN
1706	1.786	9.80714	6.06556	-4.10932							NaN	NaN	NaN	11.1382	6.32322	-5.35428	11.2033	6.44977	-5.4456	11.0464	6.43861	-5.602	NaN	NaN	NaN
1707	1.788	9.79354	6.05997	-4.09439							NaN	NaN	NaN	11.1076	6.2989	-5.33579	11.1904	6.43675	-5.43779	11.0396	6.42714	-5.59914	NaN	NaN	NaN
1708	1.79	9.78215	6.05675	-4.07971							NaN	NaN	NaN	11.0957	6.28084	-5.32647	11.1952	6.42639	-5.44169	11.0225	6.41379	-5.59264	NaN	NaN	NaN
1709	1.792	9.77446	6.05762	-4.06591				10.676	5.9667	-4.99248	NaN	NaN	NaN	11.1135	6.28459	-5.33457	11.1847	6.4082	-5.43738	11.0075	6.38797	-5.57451	NaN	NaN	NaN
1710	1.794	9.76251	6.05322	-4.05138				10.6597	5.96376	-4.98404	NaN	NaN	NaN	11.1129	6.27564	-5.32875	11.187	6.39227	-5.4348	11.0158	6.39091	-5.57443	NaN	NaN	NaN
1711	1.796	9.74612	6.04818	-4.03687				10.6446	5.96078	-4.96913	NaN	NaN	NaN	11.1023	6.26587	-5.32161	11.1711	6.38866	-5.42964	11.0212	6.38882	-5.57316	NaN	NaN	NaN
1712	1.798	9.73775	6.04695	-4.0237				10.6297	5.95815	-4.96109	NaN	NaN	NaN	11.116	6.26076	-5.32378	11.1617	6.36254	-5.4169	10.9905	6.36171	-5.55396	NaN	NaN	NaN
1713	1.8	9.72768	6.04492	-4.00974				10.6126	5.95495	-4.94852	NaN	NaN	NaN	11.1171	6.25051	-5.32121	11.1578	6.34704	-5.40505	10.9865	6.34849	-5.54729	NaN	NaN	NaN
1714	1.802	9.71663	6.04079	-3.9954				10.5987	5.95226	-4.93398	NaN	NaN	NaN	11.102	6.23192	-5.30651	11.1576	6.33985	-5.39903	10.9656	6.31543	-5.53743	NaN	NaN	NaN
1715	1.804	9.70565	6.03761	-3.9807				10.5836	5.94963	-4.9254	NaN	NaN	NaN	11.0903	6.21083	-5.29353	11.1507	6.33015	-5.39017	10.9504	6.29931	-5.52578	NaN	NaN	NaN
1716	1.806	9.69376	6.03336	-3.96528				10.5673	5.94663	-4.91307	NaN	NaN	NaN	11.0604	6.18066	-5.27342	11.1532	6.31025	-5.37545	10.9521	6.28577	-5.51976	NaN	NaN	NaN
1717	1.808	9.68358	6.03028	-3.95012				10.5545	5.94453	-4.90504	NaN	NaN	NaN	11.0685	6.17377	-5.27157	11.1405	6.29381	-5.36253	10.9356	6.25833	-5.50282	NaN	NaN	NaN
1718	1.81	9.67091	6.02557	-3.9357				10.5367	5.94101	-4.88925	NaN	NaN	NaN	11.0708	6.16559	-5.26688	11.1312	6.26826	-5.35341	10.9259	6.23942	-5.49582	NaN	NaN	NaN
1719	1.812	9.66106	6.02235	-3.91868				10.5218	5.93847	-4.88056	NaN	NaN	NaN	11.0482	6.145	-5.25052	11.1302	6.25843	-5.3536	10.9217	6.23003	-5.47846	NaN	NaN	NaN
1720	1.814	9.64958	6.01821	-3.90476				10.5054	5.93545	-4.86807	NaN	NaN	NaN	11.0825	6.16423	-5.25989	11.1168	6.23906	-5.33605	10.9172	6.21898	-5.47755	NaN	NaN	NaN
1721	1.816	9.63981	6.01435	-3.88933				10.4886	5.93254	-4.85857	NaN	NaN	NaN	11.0547	6.14503	-5.24289	11.0873	6.21333	-5.31211	10.9222	6.20572	-5.47591	NaN	NaN	NaN
1722	1.818	9.6296	6.01134	-3.87424				10.4718	5.92927	-4.84303	NaN	NaN	NaN	11.0522	6.12893	-5.23326	11.0993	6.21876	-5.3086	10.8893	6.17211	-5.45505	NaN	NaN	NaN
1723	1.82	9.61893	6.00789	-3.86011				10.4555	5.92624	-4.83092	NaN	NaN	NaN	11.0635	6.1191	-5.22684	11.1046	6.20102	-5.30449	10.8899	6.15561	-5.44985	NaN	NaN	NaN
1724	1.822	9.60755	6.00326	-3.84451				10.4356	5.92262	-4.82078	NaN	NaN	NaN	11.0294	6.08775	-5.20922	11.0807	6.17891	-5.28888	10.887	6.14501	-5.44312	NaN	NaN	NaN
1725	1.824	9.59811	6.00036	-3.8285				10.4197	5.91956	-4.80555	NaN	NaN	NaN	11.0203	6.07153	-5.19889	11.0823	6.16372	-5.28323	10.8772	6.13492	-5.42994	NaN	NaN	NaN
1726	1.826	9.59164	5.99641	-3.8143				10.4036	5.9167	-4.79683	NaN	NaN	NaN	11.0096	6.05909	-5.18937	11.0657	6.15753	-5.26638	10.8667	6.11209	-5.42271	NaN	NaN	NaN
1727	1.828	9.58154	5.99271	-3.79866				10.3786	5.91208	-4.78061	NaN	NaN	NaN	11.0114	6.06189	-5.20243	11.0807	6.14695	-5.25882	10.8583	6.09636	-5.41289	NaN	NaN	NaN
1728	1.83	9.57305	5.98968	-3.78498				10.3603	5.90846	-4.76493	NaN	NaN	NaN	11.0116	6.05246	-5.19049	11.0768	6.13588	-5.25278	10.8712	6.09109	-5.40731	NaN	NaN	NaN
1729	1.832	9.56359	5.98526	-3.76945				10.3437	5.90544	-4.7526	NaN	NaN	NaN	11.0005	6.04677	-5.18141	11.0552	6.11597	-5.23683	10.8345	6.05067	-5.37679	NaN	NaN	NaN
1730	1.834	9.55341	5.98112	-3.75278				10.3258	5.90195	-4.73693	NaN	NaN	NaN	11.0037	6.04355	-5.17212	11.0394	6.09908	-5.21977	10.8297	6.04388	-5.37044	NaN	NaN	NaN
1731	1.836	9.54656	5.97737	-3.73954				10.3091	5.89888	-4.72453	NaN	NaN	NaN	11.0113	6.04297	-5.16804	11.0179	6.07926	-5.20453	10.8264	6.02695	-5.36179	NaN	NaN	NaN
1732	1.838	9.53547	5.97403	-3.7278				10.2902	5.89532	-4.70774	NaN	NaN	NaN	10.9935	6.02538	-5.15391	11.0192	6.07213	-5.20121	10.8575	6.0457	-5.37528	NaN	NaN	NaN
1733	1.84	9.5232	5.96871	-3.71301				10.2835	5.89449	-4.70177	NaN	NaN	NaN	10.9826	6.00802	-5.14132	10.9848	6.0408	-5.17547	10.8184	6.00748	-5.3533	NaN	NaN	NaN
1734	1.842	9.51744	5.96658	-3.69349				10.2621	5.89067	-4.68632	NaN	NaN	NaN	10.9743	5.99758	-5.13236	10.9874	6.03566	-5.17041	10.7926	5.9828	-5.33519	NaN	NaN	NaN
1735	1.844	9.51801	5.97479	-3.67617				10.2429	5.88619	-4.67529	NaN	NaN	NaN	10.9602	5.98299	-5.12303	10.9906	6.01646	-5.16884	10.782	5.96463	-5.32495	NaN	NaN	NaN
1736	1.846	9.50233	5.96566	-3.66033				10.2318	5.88474	-4.66592	NaN	NaN	NaN	10.9398	5.96509	-5.10871	10.9611	6.00643	-5.14805	10.7819	5.95319	-5.31754	NaN	NaN	NaN
1737	1.848	9.48844	5.95948	-3.64295				10.2111	5.88079	-4.65281	NaN	NaN	NaN	10.929	5.9536	-5.09503	10.9391	5.97821	-5.13776	10.8018	5.96098	-5.31797	NaN	NaN	NaN
1738	1.85	9.48817	5.9644	-3.62118				10.2004	5.87916	-4.63727	NaN	NaN	NaN	10.9199	5.94389	-5.08692	10.8976	5.94372	-5.10995	10.7755	5.93816	-5.30325	NaN	NaN	NaN
1739	1.852	9.47814	5.96086	-3.605				10.1802	5.8749	-4.62714	NaN	NaN	NaN	10.9066	5.93471	-5.07487	10.9064	5.94072	-5.10619	10.7432	5.90002	-5.27196	NaN	NaN	NaN
1740	1.854	9.47438	5.96246	-3.59134				10.17	5.87296	-4.61454	NaN	NaN	NaN	10.8857	5.91474	-5.05848	10.8842	5.92297	-5.09504	10.7254	5.87313	-5.25265	NaN	NaN	NaN
1741	1.856	9.46222	5.95721	-3.57245				10.1693	5.87352	-4.60567	NaN	NaN	NaN	10.8685	5.90037	-5.04385	10.8552	5.90347	-5.0625	10.7153	5.8656	-5.24398	NaN	NaN	NaN
1742	1.858	9.4548	5.95407	-3.55861				10.1489	5.86952	-4.58963	NaN	NaN	NaN	10.8534	5.89285	-5.02519	10.8416	5.88684	-5.04945	10.7037	5.84994	-5.2317	NaN	NaN	NaN
1743	1.86	9.44345	5.94988	-3.54162				10.1523	5.88217	-4.58461	NaN	NaN	NaN	10.843	5.88148	-5.01122	10.827	5.8774	-5.03091	10.6976	5.84928	-5.2199	NaN	NaN	NaN
1744	1.862	9.43828	5.95246	-3.52836				10.1203	5.87719	-4.56264	NaN	NaN	NaN	10.8093	5.8614	-4.98974	10.8262	5.87145	-5.02663	10.7032	5.83876	-5.21282	NaN	NaN	NaN
1745	1.864	9.43324	5.95566	-3.5119				10.0897	5.87146	-4.54041	NaN	NaN	NaN	10.8009	5.85708	-4.98026	10.8303	5.86853	-5.01303	10.6968	5.83164	-5.20163	NaN	NaN	NaN
1746	1.866	9.42259	5.94994	-3.49343				10.0693	5.86764	-4.53066	NaN	NaN	NaN	10.7804	5.84311	-4.95639	10.7933	5.84547	-4.98834	10.6868	5.82725	-5.18971	NaN	NaN	NaN
1747	1.868	9.41463	5.94625	-3.47722				10.0478	5.86392	-4.51454	NaN	NaN	NaN	10.7582	5.83919	-4.94175	10.787	5.83994	-4.97404	10.6803	5.81673	-5.17635	NaN	NaN	NaN
1748	1.87	9.40966	5.94951	-3.46316				10.038	5.86781	-4.50257	NaN	NaN	NaN	10.7304	5.82883	-4.92164	10.7953	5.84075	-4.9703	10.6706	5.80553	-5.16852	NaN	NaN	NaN
1749	1.872	9.37782	5.94504	-3.44067				10.0184	5.86431	-4.48831	NaN	NaN	NaN	10.701	5.81709	-4.89877	10.7606	5.82292	-4.94149	10.6736	5.806	-5.15811	NaN	NaN	NaN
1750	1.874	9.36689	5.94188	-3.42602				10.0167	5.87552	-4.47964	NaN	NaN	NaN	10.6964	5.8127	-4.88449	10.7553	5.82314	-4.93163	10.652	5.78413	-5.14498	NaN	NaN	NaN
1751	1.876	9.34595	5.9279	-3.40716				9.99737	5.87189	-4.45914	NaN	NaN	NaN	10.6903	5.81226	-4.8755	10.7433	5.81207	-4.91955	10.6542	5.78664	-5.13471	NaN	NaN	NaN
1752	1.878	9.32529	5.9141	-3.39092				9.98349	5.87525	-4.45079	NaN	NaN	NaN	10.6782	5.8058	-4.86541	10.7354	5.81105	-4.903	10.6572	5.79214	-5.13213	NaN	NaN	NaN
1753	1.88	9.32198	5.91441	-3.37548				9.96733	5.87224	-4.4355	NaN	NaN	NaN	10.6782	5.80577	-4.85815	10.7107	5.79973	-4.88556	10.6341	5.77244	-5.11626	NaN	NaN	NaN
1754	1.882	9.32745	5.928	-3.35986				9.96139	5.8827	-4.42798	NaN	NaN	NaN	10.6611	5.8007	-4.83763	10.7073	5.79826	-4.87982	10.6291	5.77231	-5.10666	NaN	NaN	NaN
1755	1.884	9.32311	5.93242	-3.34916				9.95165	5.88675	-4.4147	NaN	NaN	NaN	10.6403	5.796	-4.8208	10.7073	5.80139	-4.87361	10.6271	5.77446	-5.09661	NaN	NaN	NaN
1756	1.886	9.31431	5.93105	-3.33488				9.94936	5.89788	-4.40912	NaN	NaN	NaN	10.6296	5.80479	-4.80608	10.6889	5.80148	-4.85484	10.6034	5.75892	-5.08258	NaN	NaN	NaN
1757	1.888	9.30822	5.93355	-3.31845				9.93014	5.89434	-4.39169	NaN	NaN	NaN	10.6028	5.79444	-4.78872	10.6804	5.79403	-4.84772	10.5974	5.75637	-5.07698	NaN	NaN	NaN
1758	1.89	9.2986	5.93208	-3.30154				9.91122	5.89098	-4.37727	NaN	NaN	NaN	10.5808	5.79104	-4.77554	10.6541	5.78984	-4.83361	10.5719	5.73823	-5.05986	NaN	NaN	NaN
1759	1.892	9.28898	5.9305	-3.28389				9.89954	5.89456	-4.36374	NaN	NaN	NaN	10.5569	5.79457	-4.76251	10.6626	5.80443	-4.82858	10.5486	5.72476	-5.03622	NaN	NaN	NaN
1760	1.894	9.28113	5.93053	-3.26809				9.88416	5.8919	-4.35078	NaN	NaN	NaN	10.5551	5.81214	-4.76281	10.6559	5.80373	-4.82372	10.5375	5.72307	-5.01948	NaN	NaN	NaN
1761	1.896	9.27411	5.9332	-3.25178				9.86657	5.88859	-4.33128	NaN	NaN	NaN	10.5371	5.81351	-4.74445	10.6319	5.7996	-4.80829	10.5244	5.71554	-5.01559	NaN	NaN	NaN
1762	1.898	9.26331	5.93128	-3.23561				9.8494	5.88552	-4.31446	NaN	NaN	NaN	10.5361	5.81431	-4.74051	10.6103	5.79548	-4.7921	10.5118	5.71167	-5.00674	NaN	NaN	NaN
1763	1.9	9.25179	5.93174	-3.21668				9.84592	5.89646	-4.30738	NaN	NaN	NaN	10.5188	5.82049	-4.73055	10.619	5.80927	-4.7968	10.4909	5.70644	-4.98649	NaN	NaN	NaN
1764	1.902	9.24538	5.93353	-3.20103				9.83034	5.89374	-4.29807	NaN	NaN	NaN	10.4987	5.81025	-4.71865	10.6047	5.81434	-4.79041	10.4725	5.69752	-4.97161	NaN	NaN	NaN
1765	1.904	9.23557	5.93177	-3.18398				9.82151	5.8979	-4.28186	NaN	NaN	NaN	10.4862	5.82591	-4.71908	10.6124	5.83446	-4.78693	10.4615	5.6956	-4.95968	NaN	NaN	NaN
1766	1.906	9.23105	5.93551	-3.17007				9.80479	5.89496	-4.26488	NaN	NaN	NaN	10.4743	5.82499	-4.70862	10.5965	5.83638	-4.78531	10.4605	5.70291	-4.95101	NaN	NaN	NaN
1767	1.908	9.2238	5.93456	-3.15412				9.78801	5.8922	-4.25211	NaN	NaN	NaN	10.463	5.83956	-4.71126	10.5786	5.83611	-4.77021	10.4362	5.68962	-4.92912	NaN	NaN	NaN
1768	1.91	9.21814	5.93828	-3.13755				9.77555	5.89041	-4.23891	NaN	NaN	NaN	10.4457	5.84837	-4.70229	10.5942	5.86228	-4.77364	10.4099	5.67809	-4.90985	NaN	NaN	NaN
1769	1.912	9.20803	5.93696	-3.12149				9.75771	5.88658	-4.22436	NaN	NaN	NaN	10.4143	5.84224	-4.69141	10.5725	5.85838	-4.75957	10.39	5.67336	-4.89297	NaN	NaN	NaN
1770	1.914	9.204	5.94161	-3.10838				9.74285	5.88402	-4.20766	NaN	NaN	NaN	10.3409	5.81805	-4.65463	10.5509	5.85445	-4.74693	10.3916	5.6782	-4.88373	NaN	NaN	NaN
1771	1.916	9.19356	5.94125	-3.08904				9.72708	5.88125	-4.19481	NaN	NaN	NaN	10.3448	5.83051	-4.65507	10.5375	5.86816	-4.74112	10.3783	5.67982	-4.88027	NaN	NaN	NaN
1772	1.918	9.18334	5.94416	-3.07312				9.71272	5.87883	-4.17873	NaN	NaN	NaN	10.3431	5.85549	-4.65334	10.5114	5.8673	-4.7339	10.3601	5.67774	-4.86374	NaN	NaN	NaN
1773	1.92	9.17608	5.94503	-3.05534				9.69803	5.87625	-4.16659	NaN	NaN	NaN	10.3174	5.86071	-4.6415	10.5004	5.87985	-4.72971	10.3434	5.6819	-4.85623	NaN	NaN	NaN
1774	1.922	9.17266	5.94993	-3.04134				9.68636	5.87442	-4.15127	NaN	NaN	NaN	10.3036	5.87196	-4.63051	10.4756	5.8838	-4.71786	10.314	5.68741	-4.83731	NaN	NaN	NaN
1775	1.924	9.1671	5.95474	-3.02548				9.67222	5.87202	-4.13887	NaN	NaN	NaN	10.2952	5.88144	-4.62952	10.4708	5.89884	-4.71723	10.286	5.68991	-4.82019	NaN	NaN	NaN
1776	1.926	9.15833	5.95511	-3.00759				9.65857	5.86967	-4.12367	9.85755	5.79552	-4.07527	10.2665	5.88387	-4.61673	10.4439	5.90242	-4.70706	10.2773	5.70482	-4.81845	NaN	NaN	NaN
1777	1.928	9.14982	5.95944	-2.99199				9.6439	5.86726	-4.1104	9.85094	5.80576	-4.06684	10.2486	5.90102	-4.60902	10.4274	5.90751	-4.69615	10.2578	5.71704	-4.81116	NaN	NaN	NaN
1778	1.93	9.14881	5.96565	-2.9771				9.62947	5.86476	-4.09498	9.8408	5.80442	-4.05524	10.2206	5.90029	-4.59693	10.4005	5.91272	-4.68503	10.2382	5.73824	-4.80044	NaN	NaN	NaN
1779	1.932	9.14385	5.97079	-2.9613				9.62711	5.87582	-4.08759	9.82139	5.80148	-4.02907	10.2234	5.91358	-4.59662	10.3834	5.92536	-4.67664	10.2235	5.75154	-4.78966	NaN	NaN	NaN
1780	1.934	9.13373	5.97075	-2.94719				9.61404	5.87361	-4.06928	9.81146	5.79983	-4.02328	10.2611	5.95888	-4.60999	10.378	5.94204	-4.67194	10.2197	5.77905	-4.78695	NaN	NaN	NaN
1781	1.936	9.12712	5.97544	-2.93108				9.60716	5.87822	-4.0566	9.80198	5.79822	-4.01165	10.2196	5.96355	-4.58708	10.3321	5.93267	-4.65933	10.1894	5.77007	-4.77731	NaN	NaN	NaN
1782	1.938	9.11843	5.97733	-2.91501				9.59379	5.87601	-4.0442	9.7923	5.7966	-4.00296	10.1891	5.96215	-4.57027	10.2982	5.94217	-4.64473	10.1667	5.78482	-4.77028	NaN	NaN	NaN
1783	1.94	9.10734	5.98116	-2.89754				9.58167	5.87403	-4.0293	9.78812	5.80227	-3.99457	10.1836	5.97957	-4.56823	10.2879	5.95166	-4.63391	10.1583	5.80574	-4.76272	NaN	NaN	NaN
1784	1.942	9.10623	5.9876	-2.88229				9.58231	5.88567	-4.01668	9.77871	5.80068	-3.98299	10.1697	5.98646	-4.5578	10.2785	5.95882	-4.63139	10.1375	5.8112	-4.75294	NaN	NaN	NaN
1785	1.944	9.09686	5.98862	-2.86564				9.56935	5.88356	-4.00435	9.76892	5.79938	-3.96861	10.1428	5.99425	-4.54445	10.2739	5.9728	-4.62024	10.1144	5.81472	-4.74667	NaN	NaN	NaN
1786	1.946	9.08832	5.99141	-2.84873				9.55721	5.88162	-3.98904	9.74351	5.78949	-3.94549	10.1382	6.01095	-4.53846	10.2714	5.98674	-4.62641	10.0974	5.82858	-4.74162	NaN	NaN	NaN
1787	1.948	9.08488	5.99863	-2.83448				9.54537	5.8798	-3.97036	9.73089	5.79265	-3.93695	10.0814	5.99964	-4.5083	10.2462	6.00052	-4.61438	10.0655	5.83798	-4.72414	NaN	NaN	NaN
1788	1.95	9.07999	6.00529	-2.82071				9.53394	5.87802	-3.9554	9.73039	5.79327	-3.92844	10.0942	6.02543	-4.51327	10.2136	6.00575	-4.59845	10.0671	5.85697	-4.72387	NaN	NaN	NaN
1789	1.952	9.07477	6.01205	-2.80531				9.52006	5.8758	-3.94213	9.72057	5.79233	-3.90848	10.0606	6.02229	-4.49703	10.1903	6.01535	-4.58753	10.0274	5.85756	-4.7087	NaN	NaN	NaN
1790	1.954	9.0654	6.01361	-2.78872				9.50904	5.87412	-3.92721	9.69465	5.78241	-3.89425	10.0415	6.0264	-4.48446	10.1819	6.02933	-4.58185	10.0104	5.87326	-4.69983	NaN	NaN	NaN
1791	1.956	9.05684	6.01666	-2.77139				9.49886	5.87263	-3.90953	9.68567	5.78092	-3.87998	10.036	6.05221	-4.47975	10.1542	6.03167	-4.56435	9.99418	5.89316	-4.6868	NaN	NaN	NaN
1792	1.958	9.05156	6.02239	-2.75642				9.48783	5.87109	-3.8967	9.67607	5.77968	-3.8658	10.0287	6.06832	-4.46624	10.1253	6.04188	-4.54992	9.97324	5.91146	-4.67659	NaN	NaN	NaN
1793	1.96	9.04098	6.02731	-2.73886				9.47644	5.86866	-3.8815	9.6602	5.77184	-3.84881	10.0261	6.08923	-4.46441	10.1016	6.05199	-4.53649	9.94399	5.91892	-4.66293	NaN	NaN	NaN
1794	1.962	9.04128	6.03566	-2.7246				9.46783	5.86823	-3.86429	9.64073	5.76896	-3.83198	9.9872	6.08503	-4.44157	10.0876	6.07462	-4.52628	9.91401	5.92196	-4.64761	NaN	NaN	NaN
1795	1.964	9.0367	6.04211	-2.71017				9.45567	5.86669	-3.84939	9.64345	5.78089	-3.82639	9.95308	6.08218	-4.41933	10.0784	6.08524	-4.51887	9.88835	5.93324	-4.63363	NaN	NaN	NaN
1796	1.966	9.0263	6.04363	-2.69445				9.44518	5.86497	-3.83391	9.62225	5.76666	-3.79816	9.93322	6.09345	-4.41255	10.0609	6.0963	-4.50558	9.87288	5.95306	-4.62541	NaN	NaN	NaN
1797	1.968	9.01943	6.04863	-2.67818				9.43469	5.8637	-3.81776	9.6164	5.76052	-3.78403	9.94169	6.11979	-4.4014	10.0292	6.10299	-4.48704	9.84609	5.967	-4.60862	NaN	NaN	NaN
1798	1.97	9.01435	6.05535	-2.66157				9.42605	5.86304	-3.80305	9.59154	5.75092	-3.76455	9.92765	6.13491	-4.38877	10.0087	6.10646	-4.46979	9.83628	5.98529	-4.59983	NaN	NaN	NaN
1799	1.972	9.00621	6.058	-2.64595				9.41575	5.8608	-3.78774	9.59079	5.75187	-3.75341	9.88624	6.1336	-4.37168	10.0046	6.12476	-4.46405	9.8191	5.99458	-4.58634	NaN	NaN	NaN
1800	1.974	8.99812	6.06442	-2.62852				9.40816	5.86126	-3.77457	9.57159	5.74907	-3.73684	9.88599	6.14558	-4.36418	9.97227	6.13165	-4.44536	9.80467	5.99777	-4.57522	NaN	NaN	NaN
1801	1.976	8.99758	6.07144	-2.61226				9.39846	5.86013	-3.75929	9.56223	5.74791	-3.72295	9.86481	6.14751	-4.34685	9.96539	6.14649	-4.4337	9.79858	6.02295	-4.56705	NaN	NaN	NaN
1802	1.978	8.99652	6.08227	-2.59764				9.38681	5.85578	-3.7406	9.55316	5.74683	-3.70626	9.84314	6.15235	-4.32755	9.95272	6.15758	-4.41599	9.75629	6.03367	-4.53904	NaN	NaN	NaN
1803	1.98	8.98571	6.08255	-2.5813				9.37727	5.85544	-3.7245	9.54385	5.74569	-3.69241	9.82864	6.15707	-4.31545	9.92784	6.16118	-4.40387	9.74937	6.0488	-4.532	NaN	NaN	NaN
1804	1.982	8.9786	6.08456	-2.56574				9.36605	5.85234	-3.70884	9.52813	5.73836	-3.67317	9.81578	6.17605	-4.30288	9.89843	6.16991	-4.38654	9.72457	6.04961	-4.52172	NaN	NaN	NaN
1805	1.984	8.97423	6.09011	-2.5514				9.35568	5.84954	-3.69258	9.50432	5.72872	-3.65407	9.80926	6.18638	-4.29213	9.89145	6.1805	-4.37329	9.71838	6.06859	-4.50658	NaN	NaN	NaN
1806	1.986	8.96461	6.09492	-2.5354				9.34381	5.84675	-3.67521	9.50386	5.72974	-3.64021	9.79147	6.19059	-4.26805	9.85441	6.17701	-4.34866	9.7157	6.0935	-4.49665	NaN	NaN	NaN
1807	1.988	8.95887	6.09717	-2.51976				9.33465	5.84506	-3.66022	9.50697	5.74163	-3.62892	9.77152	6.19794	-4.25098	9.83867	6.18293	-4.33061	9.67315	6.0898	-4.47407	NaN	NaN	NaN
1808	1.99	8.95842	6.10305	-2.50372				9.32498	5.84379	-3.64192	9.48519	5.72746	-3.61561	9.75833	6.20692	-4.23115	9.82367	6.1982	-4.31722	9.66858	6.10088	-4.46392	NaN	NaN	NaN
1809	1.992	8.95722	6.11124	-2.48697				9.31629	5.84229	-3.62717	9.46427	5.71399	-3.58847	9.74723	6.21816	-4.21934	9.81319	6.20408	-4.29852	9.6395	6.10611	-4.44275	NaN	NaN	NaN
1810	1.994	8.95058	6.11421	-2.47049				9.30679	5.84116	-3.60995	9.4698	5.72144	-3.57723	9.74479	6.23202	-4.21077	9.80777	6.22113	-4.28274	9.6231	6.11659	-4.42087	NaN	NaN	NaN
1811	1.996	8.9452	6.12075	-2.45887				9.29523	5.83769	-3.59321	9.46073	5.71999	-3.56914	9.70993	6.21659	-4.17915	9.77647	6.22255	-4.26222	9.59144	6.11916	-4.40165	NaN	NaN	NaN
1812	1.998	8.93951	6.12439	-2.44329				9.28574	5.83515	-3.5771	9.44529	5.71319	-3.54477	9.70121	6.23006	-4.17237	9.7673	6.22837	-4.23996	9.56355	6.13145	-4.37572	NaN	NaN	NaN
1813	2	8.93175	6.12514	-2.42473				9.27533	5.83326	-3.55885	9.43059	5.70586	-3.52594	9.69273	6.24224	-4.15967	9.74937	6.24318	-4.22507	9.55284	6.13739	-4.36199	NaN	NaN	NaN
1814	2.002	8.92631	6.12847	-2.40803				9.26695	5.8314	-3.54305	9.41232	5.70293	-3.5127	9.68401	6.24598	-4.1379	9.74316	6.24374	-4.21013	9.54167	6.15414	-4.34578	NaN	NaN	NaN
1815	2.004	8.9276	6.13987	-2.39056				9.25762	5.83066	-3.52719	9.40302	5.70179	-3.50198	9.67294	6.25043	-4.11326	9.72549	6.24891	-4.18915	9.51466	6.15515	-4.32376	NaN	NaN	NaN
1816	2.006	8.91813	6.14138	-2.37301				9.24868	5.82825	-3.51026	9.39701	5.69698	-3.47757	9.65333	6.24645	-4.08541	9.70458	6.25452	-4.16879	9.49971	6.17063	-4.30639	NaN	NaN	NaN
1817	2.008	8.92364	6.14631	-2.35633				9.23688	5.82534	-3.49287	9.38834	5.69609	-3.46141	9.65671	6.26469	-4.07981	9.6925	6.25821	-4.14969	9.49183	6.17775	-4.29008	NaN	NaN	NaN
1818	2.01	8.91833	6.14819	-2.34055				9.22706	5.82405	-3.4759	9.3794	5.69508	-3.44801	9.62323	6.24728	-4.0605	9.6851	6.26548	-4.13489	9.47258	6.18598	-4.26762	NaN	NaN	NaN
1819	2.012	8.91311	6.1509	-2.32388				9.22001	5.82452	-3.4618	9.37317	5.69022	-3.42648	9.61159	6.24609	-4.0389	9.66293	6.26408	-4.11094	9.46657	6.19622	-4.25575	NaN	NaN	NaN
1820	2.014	8.91119	6.15585	-2.30713				9.20918	5.82171	-3.44313	9.36978	5.69541	-3.41827	9.59183	6.23201	-4.01706	9.65576	6.26583	-4.10131	9.44724	6.19775	-4.24028	NaN	NaN	NaN
1821	2.016	8.90539	6.15741	-2.29009				9.20292	5.82416	-3.42551	9.36054	5.69468	-3.40221	9.6005	6.24622	-4.01439	9.64598	6.26816	-4.08646	9.43185	6.20623	-4.22053	NaN	NaN	NaN
1822	2.018	8.90196	6.16092	-2.2733				9.19442	5.8241	-3.40884	9.34315	5.69206	-3.38378	9.59412	6.24493	-4.00456	9.62584	6.26499	-4.06846	9.41413	6.20811	-4.20609	NaN	NaN	NaN
1823	2.02	8.89847	6.16343	-2.25719				9.18602	5.82275	-3.39209	9.32821	5.68507	-3.36545	9.56732	6.23389	-3.97991	9.60178	6.25744	-4.04977	9.39365	6.20407	-4.18993	NaN	NaN	NaN
1824	2.022	8.89388	6.16615	-2.24007				9.17606	5.82142	-3.37507	9.32852	5.68601	-3.35187	9.55751	6.23346	-3.96427	9.59028	6.25795	-4.03645	9.38905	6.22027	-4.1719	NaN	NaN	NaN
1825	2.024	8.88937	6.16927	-2.22385				9.16662	5.82045	-3.35883	9.30553	5.67718	-3.33128	9.55108	6.23217	-3.95548	9.59261	6.26312	-4.02921	9.37286	6.22252	-4.15991	NaN	NaN	NaN
1826	2.026	8.88696	6.17366	-2.20812				9.16004	5.82096	-3.3422	9.29677	5.67624	-3.31811	9.52598	6.2081	-3.93489	9.58209	6.25823	-4.01075	9.35753	6.22907	-4.13961	NaN	NaN	NaN
1827	2.028	8.87964	6.17472	-2.18329				9.15034	5.82026	-3.32533	9.28739	5.67583	-3.29955	9.53355	6.21248	-3.9311	9.56518	6.25436	-3.99958	9.34633	6.23636	-4.12289	NaN	NaN	NaN
1828	2.03	8.87473	6.17573	-2.16995				9.14133	5.82024	-3.30795	9.28469	5.68129	-3.286	9.52162	6.2039	-3.91941	9.54852	6.24641	-3.98112	9.34017	6.24989	-4.1049	NaN	NaN	NaN
1829	2.032	8.86553	6.17615	-2.1446				9.13188	5.81972	-3.28952	9.26998	5.67439	-3.26794	9.51013	6.19258	-3.9068	9.5308	6.23546	-3.96562	9.31723	6.25185	-4.08977	NaN	NaN	NaN
1830	2.034	8.85939	6.17652	-2.13241				9.12474	5.81879	-3.27468	9.26163	5.67363	-3.25219	9.49427	6.17811	-3.8894	9.53561	6.23189	-3.95259	9.31312	6.25698	-4.08453	NaN	NaN	NaN
1831	2.036	8.86889	6.18165	-2.11333				9.11412	5.81827	-3.25466	9.25896	5.6795	-3.23329	9.49134	6.17739	-3.8865	9.5153	6.22054	-3.93572	9.30887	6.2687	-4.0725	NaN	NaN	NaN
1832	2.038	8.86238	6.18251	-2.09641				9.10665	5.81908	-3.23829	9.24404	5.67249	-3.21805	9.48275	6.16247	-3.88167	9.5087	6.21451	-3.93129	9.29634	6.27396	-4.0471	NaN	NaN	NaN
1833	2.04	8.8732	6.1875	-2.08815				9.10173	5.81996	-3.2236	9.24072	5.67804	-3.20455	9.48814	6.14937	-3.86922	9.50954	6.2127	-3.9249	9.28917	6.27259	-4.02816	NaN	NaN	NaN
1834	2.042	8.8686	6.18798	-2.07142				9.09504	5.82162	-3.20567	9.22944	5.68218	-3.18347	9.47948	6.14558	-3.86729	9.49676	6.19446	-3.91467	9.29231	6.28946	-4.02024	NaN	NaN	NaN
1835	2.044	8.86497	6.18981	-2.05476				9.08583	5.8206	-3.18805	9.22286	5.67672	-3.17321	9.45821	6.113	-3.84912	9.49505	6.18884	-3.90526	9.2728	6.26174	-3.99368	NaN	NaN	NaN
1836	2.046	8.84305	6.18625	-2.02691				9.07726	5.82022	-3.17216	9.21504	5.67663	-3.14961	9.44939	6.10403	-3.84151	9.49017	6.17545	-3.89585	9.26751	6.26621	-3.99003	NaN	NaN	NaN
1837	2.048	8.83648	6.18573	-2.00939				9.06885	5.82118	-3.15449	9.20878	5.68746	-3.12537	9.44058	6.08959	-3.83297	9.4895	6.16743	-3.88711	9.24329	6.23962	-3.96522	NaN	NaN	NaN
1838	2.05	8.82848	6.1866	-1.98661				9.06176	5.82333	-3.13686	9.20922	5.68851	-3.11201	9.43648	6.07413	-3.8273	9.47704	6.15772	-3.87628	9.23502	6.22438	-3.94769	NaN	NaN	NaN
1839	2.052	8.82867	6.1874	-1.97026				9.05716	5.82568	-3.12198	9.20038	5.68787	-3.09646	9.42975	6.05831	-3.81219	9.4763	6.14254	-3.86766	9.22675	6.20811	-3.9258	NaN	NaN	NaN
1840	2.054	8.83136	6.19123	-1.95355				9.04912	5.82725	-3.10549	9.18702	5.68123	-3.07624	9.42829	6.04954	-3.80086	9.46668	6.12797	-3.84862	9.21118	6.19484	-3.90979	NaN	NaN	NaN
1841	2.056	8.83159	6.1921	-1.93761				9.03762	5.82742	-3.08782	9.18278	5.68703	-3.06009	9.42202	6.03378	-3.78391	9.45127	6.1153	-3.84043	9.20794	6.18528	-3.89631	NaN	NaN	NaN
1842	2.058	8.82578	6.19162	-1.92091				9.03109	5.82793	-3.07105	9.17541	5.68679	-3.03939	9.42351	6.03661	-3.77635	9.4441	6.1018	-3.82618	9.18404	6.16524	-3.87813	NaN	NaN	NaN
1843	2.06	8.82045	6.19033	-1.90323				9.02543	5.83146	-3.05427	9.16286	5.69016	-3.02914	9.44004	6.02794	-3.77349	9.45141	6.09123	-3.82121	9.18762	6.14824	-3.86403	NaN	NaN	NaN
1844	2.062	8.82345	6.19218	-1.88444				9.01928	5.83433	-3.0389	9.15456	5.69018	-3.00577	9.41503	6.01216	-3.7539	9.44504	6.08459	-3.8134	9.18316	6.14539	-3.85434	NaN	NaN	NaN
1845	2.064	8.81656	6.18989	-1.86738				9.00891	5.83619	-3.01677	9.15544	5.69151	-2.98989	9.41176	5.99587	-3.73991	9.43079	6.06463	-3.78677	9.18053	6.13329	-3.84084	NaN	NaN	NaN
1846	2.066	8.80473	6.18735	-1.83956				9.00125	5.83769	-3.00114	9.14337	5.69552	-2.97175	9.40383	5.97656	-3.72509	9.42487	6.05197	-3.77942	9.16894	6.11988	-3.83103	NaN	NaN	NaN
1847	2.068	8.80623	6.1894	-1.82706				8.9956	5.84106	-2.9842	9.13467	5.69489	-2.9564	9.40684	5.97208	-3.72135	9.41623	6.03454	-3.76878	9.16058	6.10863	-3.81852	NaN	NaN	NaN
1848	2.07	8.79774	6.18747	-1.80949				8.9877	5.84332	-2.96572	9.12669	5.69428	-2.94115	9.3898	5.95506	-3.70103	9.41291	6.02531	-3.7547	9.16075	6.09525	-3.80411	NaN	NaN	NaN
1849	2.072	8.80703	6.19209	-1.78859				8.97992	5.8457	-2.94852	9.12387	5.70002	-2.92518	9.37917	5.93533	-3.68359	9.405	6.01667	-3.73994	9.16442	6.08574	-3.79573	NaN	NaN	NaN
1850	2.074	8.80682	6.19237	-1.77311				8.97284	5.84882	-2.93241	9.11608	5.70033	-2.8994	9.36323	5.92189	-3.67084	9.39956	6.00352	-3.72788	9.13569	6.05837	-3.77765	9.64918	6.11345	-3.71091
1851	2.076	8.80013	6.19292	-1.75165				8.96614	5.85177	-2.91652	9.11251	5.70561	-2.88867	9.37052	5.91191	-3.65506	9.39105	5.98449	-3.71441	9.13594	6.04626	-3.76545	9.64312	6.09913	-3.69062
1852	2.078	8.80691	6.19369	-1.73669				8.95896	5.85465	-2.89734	9.09612	5.70328	-2.87152	9.37969	5.90413	-3.6411	9.38992	5.97821	-3.70711	9.13445	6.04098	-3.75695	9.64002	6.08541	-3.67898
1853	2.08	8.80253	6.19184	-1.71939				8.95665	5.8589	-2.88499	9.08763	5.70314	-2.85106	9.35366	5.88122	-3.62413	9.38029	5.95888	-3.68863	9.1304	6.02224	-3.74288	9.63537	6.0716	-3.66567
1854	2.082	8.79755	6.19177	-1.69704				8.94621	5.86157	-2.86502	9.07957	5.70325	-2.82805	9.34979	5.86713	-3.60681	9.37848	5.94994	-3.67503	9.11526	6.01147	-3.73485	9.63032	6.06063	-3.64987
1855	2.084	8.78864	6.1889	-1.6827				8.94119	5.8656	-2.84739	9.06838	5.70726	-2.81023	9.34773	5.85497	-3.59594	9.37873	5.93891	-3.65989	9.12283	5.99796	-3.72074	9.61883	6.04465	-3.63268
1856	2.086	8.79552	6.19011	-1.66454				8.93574	5.86908	-2.83137	9.05607	5.71094	-2.79492	9.34343	5.84268	-3.57409	9.34763	5.90957	-3.63348	9.10915	5.98045	-3.70671	9.61016	6.02792	-3.61707
1857	2.088	8.79082	6.18926	-1.64699				8.93071	5.87386	-2.81393	9.05753	5.71267	-2.7767	9.31592	5.81333	-3.54754	9.34544	5.89398	-3.6234	9.11064	5.97071	-3.69661	9.60289	6.0136	-3.60364
1858	2.09	8.78698	6.18715	-1.62933				8.92135	5.87725	-2.79538	9.05439	5.71816	-2.76343	9.30367	5.80272	-3.52875	9.32429	5.87577	-3.60641	9.10584	5.95531	-3.68342	9.59717	6.00307	-3.58874
1859	2.092	8.78357	6.18665	-1.61292				8.91531	5.88094	-2.77992	9.03793	5.71609	-2.74392	9.31003	5.80339	-3.51762	9.32141	5.86708	-3.59405	9.08272	5.94369	-3.66907	9.59953	5.99133	-3.57847
1860	2.094	8.77735	6.18368	-1.59617				8.90832	5.88403	-2.7616	9.02611	5.72001	-2.72613	9.30299	5.79394	-3.50516	9.31666	5.85443	-3.57921	9.09313	5.93418	-3.65685	9.59445	5.97468	-3.56189
1861	2.096	8.77373	6.18198	-1.57006				8.89822	5.88706	-2.7441	9.01841	5.7195	-2.71124	9.30508	5.78699	-3.48517	9.30766	5.8361	-3.55726	9.07932	5.91709	-3.64351	9.59187	5.9652	-3.54613
1862	2.098	8.76729	6.1813	-1.55422				8.89471	5.89136	-2.7285	9.00736	5.72351	-2.69361	9.28864	5.77246	-3.46312	9.30137	5.82678	-3.54306	9.07654	5.90861	-3.62829	9.56906	5.93657	-3.51927
1863	2.1	8.77241	6.18139	-1.53462				8.88427	5.89491	-2.71048	9.00828	5.7257	-2.67019	9.28481	5.76406	-3.44614	9.29068	5.80814	-3.52223	9.05903	5.88536	-3.61267	9.56426	5.92695	-3.50679
1864	2.102	8.76704	6.18137	-1.51814				8.87948	5.90065	-2.69078	8.99685	5.72942	-2.65516	9.28821	5.75539	-3.42993	9.29229	5.8039	-3.50816	9.05206	5.87105	-3.59015	9.55722	5.919	-3.49124
1865	2.104	8.77272	6.18306	-1.49588				8.87469	5.90612	-2.67418	8.99111	5.73949	-2.63929	9.26339	5.74284	-3.40827	9.28387	5.79284	-3.49055	9.0452	5.86402	-3.58287	9.55316	5.90879	-3.47628
1866	2.106	8.77241	6.18376	-1.47546				8.86957	5.91193	-2.65809	8.99033	5.74051	-2.6261	9.26381	5.7336	-3.39225	9.28657	5.78202	-3.47517	9.03924	5.84805	-3.56202	9.56647	5.90616	-3.46355
1867	2.108	8.774	6.18603	-1.45889				8.86428	5.91642	-2.64149	8.97704	5.74894	-2.60856	9.25557	5.72664	-3.37009	9.27889	5.77653	-3.45386	9.03738	5.84168	-3.55046	9.55595	5.89562	-3.44657
1868	2.11	8.76499	6.18282	-1.44408				8.85397	5.92001	-2.62308	8.98271	5.75645	-2.59461	9.24425	5.71695	-3.34376	9.28089	5.77783	-3.43828	9.01777	5.81768	-3.53064	9.54504	5.88081	-3.429
1869	2.112	8.77094	6.1853	-1.42196				8.84834	5.92478	-2.60488	8.97483	5.75615	-2.57725	9.22437	5.69891	-3.31807	9.2653	5.7604	-3.41322	9.01738	5.81088	-3.51803	9.5253	5.85881	-3.41024
1870	2.114	8.77236	6.18514	-1.40653				8.84263	5.92984	-2.58868	8.9636	5.76032	-2.55712	9.21829	5.69064	-3.29349	9.26093	5.75176	-3.39929	9.01494	5.80248	-3.49922	9.52081	5.8504	-3.39384
1871	2.116	8.76566	6.1848	-1.39196				8.83789	5.93515	-2.57317	8.96052	5.76576	-2.54395	9.20964	5.68195	-3.26552	9.24955	5.7404	-3.3759	9.00106	5.78611	-3.47907	9.52017	5.84674	-3.38245
1872	2.118	8.76403	6.18371	-1.37061				8.83295	5.93997	-2.55738	8.96621	5.77329	-2.52999	9.19289	5.66844	-3.24259	9.23625	5.73202	-3.35913	8.99372	5.77256	-3.46294	9.51753	5.84557	-3.3649
1873	2.12	8.76498	6.18539	-1.35105				8.82546	5.94544	-2.53579	8.96097	5.78368	-2.51162	9.19018	5.66944	-3.2213	9.23947	5.72704	-3.33952	8.99013	5.76876	-3.44574	9.50542	5.82491	-3.34827
1874	2.122	8.75687	6.18328	-1.33669				8.82209	5.95168	-2.52046	8.95269	5.78305	-2.49688	9.17447	5.66099	-3.19654	9.23888	5.72305	-3.32618	8.99731	5.7638	-3.43195	9.49387	5.81128	-3.32483
1875	2.124	8.75559	6.18261	-1.31656				8.81952	5.95836	-2.50529	8.95039	5.78865	-2.48385	9.17529	5.66119	-3.17608	9.23229	5.71788	-3.30031	8.98263	5.74657	-3.41133	9.49022	5.80432	-3.30655
1876	2.126	8.76319	6.1844	-1.30211				8.81943	5.96757	-2.4891	8.93893	5.79296	-2.46117	9.16594	5.65666	-3.16429	9.22016	5.70657	-3.28001	8.97043	5.73108	-3.38754	NaN	NaN	NaN
1877	2.128	8.76434	6.19013	-1.28261				8.80988	5.97152	-2.47027	8.93665	5.79857	-2.44816	9.16062	5.6555	-3.14595	9.20522	5.69291	-3.26122	8.97059	5.73605	-3.37535	NaN	NaN	NaN
1878	2.13	8.76486	6.19477	-1.26089				8.80559	5.97725	-2.45463	8.91987	5.7963	-2.42919	9.14435	5.65199	-3.12474	9.204	5.69401	-3.24161	8.95729	5.7169	-3.34853	NaN	NaN	NaN
1879	2.132	8.77004	6.19678	-1.24448				8.80173	5.98326	-2.43497	8.93074	5.80993	-2.41671	9.1454	5.65204	-3.10615	9.19905	5.69266	-3.22758	8.95562	5.71789	-3.33192	NaN	NaN	NaN
1880	2.134	8.7629	6.19265	-1.22991				8.79379	5.98808	-2.41663	8.91913	5.81368	-2.39927	9.13444	5.65133	-3.08383	9.1949	5.69303	-3.21281	8.94344	5.7037	-3.313	NaN	NaN	NaN
1881	2.136	8.75529	6.19207	-1.21174				8.79029	5.99393	-2.40061	8.9172	5.81918	-2.38894	9.13404	5.65274	-3.067	9.18534	5.68734	-3.19359	8.93598	5.69811	-3.29662	NaN	NaN	NaN
1882	2.138	8.76781	6.19989	-1.1936				8.78286	5.99879	-2.38182	8.91501	5.82595	-2.363	9.11439	5.64529	-3.04375	9.1763	5.68339	-3.17742	8.92564	5.69326	-3.27909	NaN	NaN	NaN
1883	2.14	8.75953	6.19839	-1.17474				8.77887	6.00437	-2.36574	8.89503	5.82739	-2.34917	9.1032	5.64457	-3.02245	9.15962	5.6713	-3.15596	8.9211	5.69106	-3.26127	NaN	NaN	NaN
1884	2.142	8.75339	6.19851	-1.15874				8.77504	6.00957	-2.35039	8.89281	5.83302	-2.33622	9.09415	5.64457	-3.00005	9.15293	5.67171	-3.12906	8.90891	5.68523	-3.23524	NaN	NaN	NaN
1885	2.144	8.75822	6.20248	-1.14101				8.76834	6.01412	-2.32999	8.90366	5.84669	-2.32363	9.07355	5.64414	-2.9706	9.14707	5.67219	-3.10318	8.90908	5.68661	-3.21642	NaN	NaN	NaN
1886	2.146	8.7573	6.2031	-1.12298				8.76494	6.01984	-2.31345	8.89291	5.85065	-2.30644	9.06916	5.64945	-2.95241	9.14059	5.67201	-3.09056	8.89128	5.67757	-3.19972	NaN	NaN	NaN
1887	2.148	8.75577	6.20448	-1.10723				8.75897	6.02509	-2.29627	8.8896	5.85618	-2.29069	9.06342	5.65451	-2.93674	9.13403	5.6735	-3.07912	8.87194	5.66855	-3.17446	NaN	NaN	NaN
1888	2.15	8.75771	6.20839	-1.08856				8.75591	6.03064	-2.28034	8.88809	5.86272	-2.27011	9.05865	5.6585	-2.91671	9.13426	5.68336	-3.06223	8.86777	5.66996	-3.15999	NaN	NaN	NaN
1889	2.152	8.75541	6.21016	-1.071				8.75338	6.03694	-2.2625	8.88973	5.87383	-2.26088	9.06609	5.68176	-2.89907	9.12497	5.68277	-3.0454	8.85782	5.66809	-3.14025	NaN	NaN	NaN
1890	2.154	8.75816	6.21515	-1.05493				8.75019	6.04215	-2.24547	8.88261	5.87391	-2.24143	9.05656	5.69279	-2.88154	9.11563	5.68452	-3.01648	8.85146	5.66593	-3.11595	NaN	NaN	NaN
1891	2.156	8.75876	6.21756	-1.03746				8.74356	6.04721	-2.22528	8.86631	5.87137	-2.22548	9.05297	5.70491	-2.86624	9.1047	5.68345	-3.00109	8.83625	5.65925	-3.09506	NaN	NaN	NaN
1892	2.158	8.7577	6.22097	-1.01792				8.7377	6.05165	-2.20765	8.86944	5.88364	-2.20878	9.04278	5.70601	-2.84747	9.09672	5.68646	-2.98361	8.82878	5.65711	-3.07857	NaN	NaN	NaN
1893	2.16	8.76149	6.22732	-0.998772				8.73496	6.05692	-2.19112	8.86697	5.88943	-2.19322	9.02496	5.71339	-2.83231	9.08718	5.6909	-2.96612	8.82209	5.66556	-3.05342	NaN	NaN	NaN
1894	2.162	8.75918	6.22874	-0.983291				8.73237	6.06275	-2.17434	8.85581	5.89297	-2.17867	9.01652	5.72598	-2.81971	9.07155	5.68802	-2.9499	8.81377	5.65989	-3.03596	NaN	NaN	NaN
1895	2.164	8.75827	6.23094	-0.965816				8.72744	6.06715	-2.15778	8.84799	5.89277	-2.1592	8.99195	5.72694	-2.80053	9.06235	5.69435	-2.92891	8.80478	5.65954	-3.01347	NaN	NaN	NaN
1896	2.166	8.75937	6.23647	-0.950271				8.72374	6.07132	-2.13907	8.84555	5.89855	-2.14368	8.99744	5.74243	-2.79115	9.05146	5.6989	-2.91712	8.80665	5.66245	-2.99629	NaN	NaN	NaN
1897	2.168	8.75844	6.23858	-0.931727				8.72059	6.07598	-2.12237	8.83834	5.89815	-2.12954	9.00957	5.7649	-2.77584	9.04628	5.71181	-2.89845	8.79707	5.66047	-2.97927	NaN	NaN	NaN
1898	2.17	8.76232	6.24578	-0.912716				8.71602	6.08065	-2.10166	8.84069	5.91013	-2.11266	8.99942	5.78021	-2.76581	9.03357	5.71459	-2.88049	8.78621	5.66269	-2.95183	NaN	NaN	NaN
1899	2.172	8.76074	6.24891	-0.896684				8.71353	6.08485	-2.08617	8.83268	5.9094	-2.09838	8.99104	5.79484	-2.74803	9.024	5.72259	-2.87131	8.7761	5.65856	-2.92924	9.29246	5.71294	-2.87941
1900	2.174	8.76271	6.25453	-0.878663				8.70747	6.08686	-2.06978	8.8308	5.91562	-2.08044	8.97351	5.797	-2.73415	9.02047	5.73551	-2.85471	8.76073	5.65434	-2.90809	9.27238	5.71491	-2.86331
1901	2.176	8.76203	6.25849	-0.863585				8.70424	6.09088	-2.05049	8.82306	5.91542	-2.06111	8.95682	5.81586	-2.72413	9.02248	5.75566	-2.83937	8.76423	5.67517	-2.88799	9.27206	5.7209	-2.85337
1902	2.178	8.76383	6.26362	-0.845953				8.6987	6.09361	-2.03172	8.82882	5.92307	-2.04703	8.97362	5.83415	-2.71452	9.01436	5.7657	-2.82538	8.76535	5.68611	-2.87977	9.25576	5.72217	-2.84045
1903	2.18	8.76228	6.26763	-0.82948				8.69511	6.0982	-2.01288	8.81829	5.927	-2.0302	8.95535	5.84317	-2.69593	9.00671	5.77788	-2.81349	8.7596	5.69614	-2.86149	9.25076	5.73753	-2.82582
1904	2.182	8.76344	6.27241	-0.811703				8.68916	6.10101	-1.99148	8.81088	5.92671	-2.01358	8.95469	5.85897	-2.68692	9.00217	5.7952	-2.7978	8.74501	5.70055	-2.8416	9.25007	5.7537	-2.81369
1905	2.184	8.76288	6.27715	-0.793922				8.68597	6.10391	-1.97629	8.80876	5.93303	-1.99307	8.94269	5.87255	-2.67186	8.99722	5.80815	-2.78745	8.7456	5.72396	-2.82929	9.22592	5.76082	-2.79681
1906	2.186	8.76778	6.28581	-0.777498				8.68115	6.1065	-1.95839	8.81142	5.94491	-1.97879	8.95398	5.89154	-2.65926	8.99443	5.82688	-2.77246	8.73117	5.73729	-2.80717	9.22977	5.7808	-2.78366
1907	2.188	8.76941	6.29045	-0.758316				8.67773	6.10947	-1.93949	8.81164	5.94605	-1.966	8.94387	5.90681	-2.65004	8.98654	5.84017	-2.75749	8.72723	5.75626	-2.79124	9.23643	5.7952	-2.77286
1908	2.19	8.76899	6.29564	-0.742268				8.67689	6.1139	-1.92016	8.80454	5.9463	-1.94438	8.939	5.91881	-2.63444	8.97837	5.85296	-2.74609	8.70826	5.76583	-2.77084	9.23246	5.80987	-2.75664
1909	2.192	8.77083	6.30117	-0.724951				8.67195	6.11615	-1.90207	8.7972	5.94602	-1.92787	8.9397	5.93678	-2.62494	8.97383	5.87077	-2.7308	8.70159	5.78527	-2.7558	9.22538	5.82637	-2.73843
1910	2.194	8.77135	6.30812	-0.707405				8.66847	6.11759	-1.88651	8.78989	5.94574	-1.91139	8.92896	5.95099	-2.60567	8.96967	5.88748	-2.71698	8.6946	5.80231	-2.74007	9.22402	5.84315	-2.72533
1911	2.196	8.77432	6.31346	-0.691169				8.66532	6.12109	-1.8679	8.77891	5.94979	-1.8895	8.93269	5.97007	-2.59238	8.96168	5.89984	-2.70221	8.68261	5.8143	-2.72529	9.20858	5.85438	-2.70801
1912	2.198	8.77547	6.32036	-0.67446				8.6643	6.12425	-1.8483	8.78498	5.95741	-1.87804	8.93052	5.98447	-2.57655	8.9574	5.91691	-2.68752	8.68107	5.834	-2.71297	9.20644	5.86707	-2.69562
1913	2.2	8.77905	6.32586	-0.657994				8.66133	6.1274	-1.83042	8.78463	5.95865	-1.86006	8.92255	6.00574	-2.56386	8.94473	5.92318	-2.67151	8.69779	5.86759	-2.70293	9.19699	5.88163	-2.67816
1914	2.202	8.77699	6.32918	-0.641987				8.65604	6.12915	-1.80842	8.77356	5.9533	-1.8378	8.916	6.01191	-2.55168	8.94095	5.93937	-2.65359	8.67359	5.87198	-2.68363	9.18983	5.89352	-2.66624
1915	2.204	8.77949	6.33792	-0.625909				8.65467	6.13175	-1.79	8.77624	5.96516	-1.8235	8.91022	6.02753	-2.53081	8.93858	5.95939	-2.63879	8.6691	5.88825	-2.6695	9.19218	5.91956	-2.6507
1916	2.206	8.78541	6.3478	-0.609072				8.65246	6.13389	-1.77582	8.76987	5.96593	-1.79972	8.90782	6.03632	-2.52057	8.92788	5.96994	-2.62241	8.6848	5.91943	-2.65776	9.18389	5.93352	-2.6364
1917	2.208	8.78887	6.3567	-0.593345				8.65318	6.13862	-1.75588	8.76605	5.96146	-1.78625	8.88677	6.0516	-2.49774	8.9173	5.98189	-2.60811	8.68626	5.94736	-2.64311	9.18221	5.95054	-2.62148
1918	2.21	8.79046	6.36457	-0.577274				8.6491	6.13989	-1.73981	8.76239	5.96633	-1.77318	8.89045	6.06414	-2.48185	8.91787	6.00383	-2.59108	8.67839	5.96546	-2.62844	9.16804	5.96136	-2.6053
1919	2.212	8.79464	6.3719	-0.55969				8.64622	6.1436	-1.7182	8.75552	5.96722	-1.74428	8.9013	6.09236	-2.46517	8.90862	6.0133	-2.5758	8.6728	5.98305	-2.61134	9.16374	5.97803	-2.59197
1920	2.214	8.79594	6.37871	-0.545172				8.64723	6.14675	-1.70332	8.76162	5.97488	-1.7328	8.88921	6.10098	-2.44689	8.90574	6.03333	-2.55674	8.66154	5.99406	-2.59535	9.15975	5.99345	-2.57834
1921	2.216	8.79709	6.38542	-0.530911				8.64196	6.14772	-1.68174	8.75389	5.97412	-1.719	8.88128	6.11398	-2.43065	8.90429	6.05046	-2.54147	8.65539	6.00761	-2.57986	9.15287	6.00815	-2.5581
1922	2.218	8.80654	6.39989	-0.514233				8.64075	6.14947	-1.66399	8.75568	5.97685	-1.69656	8.87821	6.12841	-2.41186	8.8996	6.06559	-2.5247	8.65759	6.03368	-2.5616	9.16734	6.02907	-2.54716
1923	2.22	8.81014	6.40826	-0.4971				8.63779	6.15129	-1.64529	8.74798	5.9761	-1.68282	8.87972	6.14701	-2.40046	8.8957	6.08416	-2.50382	8.66399	6.06482	-2.54214	9.15627	6.04176	-2.52813
1924	2.222	8.80895	6.41215	-0.481622				8.63563	6.15322	-1.62319	8.744	5.97173	-1.66691	8.88281	6.15971	-2.38169	8.89193	6.09836	-2.48842	8.6495	6.0715	-2.52166	9.15767	6.05645	-2.51198
1925	2.224	8.81351	6.41922	-0.465176				8.63327	6.15491	-1.60597	8.73695	5.9721	-1.64324	8.87031	6.16887	-2.35362	8.89154	6.11667	-2.46772	8.6455	6.09184	-2.50883	9.15496	6.06977	-2.49819
1926	2.226	8.81308	6.42433	-0.450539				8.63228	6.15625	-1.5901	8.74249	5.97981	-1.62654	8.85487	6.17473	-2.33723	8.88903	6.13529	-2.44864	8.63609	6.10399	-2.48374	9.15102	6.08398	-2.47941
1927	2.228	8.81706	6.43164	-0.435472				8.63198	6.15862	-1.57098	8.73577	5.98016	-1.60553	8.86535	6.19795	-2.3188	8.88437	6.14914	-2.42986	8.62836	6.12001	-2.4641	9.14533	6.10043	-2.45988
1928	2.23	8.81613	6.43865	-0.421038				8.62933	6.15995	-1.55231	8.72936	5.9805	-1.58715	8.86301	6.21206	-2.29525	8.87505	6.15705	-2.41344	8.62954	6.14217	-2.44587	9.14903	6.11219	-2.44898
1929	2.232	8.81987	6.44747	-0.406671				8.62671	6.16081	-1.53265	8.73066	5.98275	-1.56726	8.8491	6.21782	-2.2795	8.86787	6.16833	-2.39496	8.62422	6.15773	-2.42427	9.13636	6.12211	-2.4275
1930	2.234	8.82233	6.45505	-0.393577				8.6222	6.16189	-1.51335	8.72338	5.98257	-1.54873	8.84876	6.22948	-2.26211	8.86596	6.18426	-2.37486	8.61965	6.17029	-2.41093	9.13793	6.139	-2.40826
1931	2.236							8.62341	6.16323	-1.49525	8.72561	5.98538	-1.52909	8.85237	6.24325	-2.245	8.86349	6.19929	-2.35398	8.61646	6.18375	-2.39069	9.12979	6.14938	-2.38987
1932	2.238							8.62393	6.16577	-1.47553	8.71838	5.98522	-1.51063	8.85565	6.25711	-2.22514	8.86058	6.21393	-2.33311	8.62118	6.20712	-2.37064	9.12281	6.1603	-2.37084
1933	2.24							8.61756	6.1656	-1.45559	8.72035	5.98806	-1.48844	8.8498	6.26455	-2.20293	8.85907	6.22906	-2.31232	8.60817	6.21298	-2.34717	9.11678	6.17493	-2.35168
1934	2.242							8.61976	6.16765	-1.43881	8.72533	5.99522	-1.47412	8.8466	6.28	-2.18269	8.85631	6.2403	-2.29346	8.61055	6.23321	-2.32666	9.11708	6.18613	-2.33423
1935	2.244							8.6185	6.1692	-1.41777	8.71813	5.99504	-1.45573	8.85614	6.29575	-2.16217	8.85274	6.25223	-2.27247	8.61276	6.25341	-2.3061	9.11955	6.19991	-2.31321
1936	2.246							8.61916	6.17132	-1.40015	8.70766	5.99004	-1.43452	8.85101	6.30163	-2.13572	8.85107	6.26381	-2.25165	8.61974	6.27511	-2.28393	9.11233	6.21102	-2.29008
1937	2.248							8.61626	6.17158	-1.38322	8.70908	5.99235	-1.41479	8.84625	6.30805	-2.11591	8.85054	6.27643	-2.23192	8.60637	6.27545	-2.26323	9.11462	6.22434	-2.27302
1938	2.25							8.61478	6.17278	-1.36176	8.70988	5.99408	-1.39742	8.83132	6.31005	-2.0898	8.84807	6.28634	-2.20876	8.60897	6.29306	-2.24472	9.10589	6.23199	-2.25156
1939	2.252							8.61036	6.17324	-1.34165	8.69069	5.98667	-1.37526	8.82181	6.31217	-2.07032	8.84516	6.29742	-2.18824	8.60757	6.30728	-2.22212	9.12193	6.24857	-2.23491
1940	2.254							8.61197	6.17601	-1.32406	8.69204	5.98843	-1.36308	8.83708	6.3329	-2.04632	8.84401	6.30815	-2.16449	8.60722	6.32274	-2.2009	9.10642	6.256	-2.2131
1941	2.256							8.61023	6.17689	-1.30443	8.69388	5.99135	-1.33853	8.83494	6.33754	-2.01783	8.84318	6.31714	-2.1419	8.60304	6.33409	-2.17514	9.10695	6.26477	-2.19092
1942	2.258							8.61053	6.17922	-1.28964	8.69473	5.9931	-1.32125	8.82911	6.34816	-1.99378	8.83898	6.32562	-2.12032	8.60438	6.34552	-2.15221	9.11203	6.27902	-2.16625
1943	2.26							8.6095	6.18134	-1.26806	8.7014	6.00199	-1.29735	8.83257	6.35044	-1.97716	8.83686	6.33278	-2.09885	8.60158	6.35879	-2.13019	9.11365	6.28629	-2.15204
1944	2.262							8.60733	6.18207	-1.24979	8.69775	5.99781	-1.28205	8.83579	6.36041	-1.95679	8.83611	6.34062	-2.07696	8.60254	6.37117	-2.10738	9.10269	6.29161	-2.12543
1945	2.264							8.60372	6.18367	-1.22593	8.69266	5.99951	-1.25698	8.83317	6.36316	-1.93967	8.83442	6.34968	-2.05498	8.60166	6.38513	-2.08394	9.09736	6.29931	-2.10505
1946	2.266							8.606	6.18588	-1.2105	8.69331	6.00126	-1.23721	8.84278	6.3732	-1.92633	8.8416	6.35996	-2.03852	8.59718	6.39053	-2.06351	9.11365	6.31159	-2.08535
1947	2.268							8.60421	6.18723	-1.19168	8.68607	6.00109	-1.21668	8.8463	6.37258	-1.90798	8.84193	6.36693	-2.01665	8.59576	6.40303	-2.04376	9.10958	6.31797	-2.06122
1948	2.27							8.60347	6.18817	-1.1747	8.68921	6.00477	-1.19506	8.8452	6.3722	-1.88246	8.8403	6.37397	-1.99535	8.59561	6.41289	-2.02251	9.10877	6.32474	-2.03976
1949	2.272							8.60112	6.19052	-1.15271	8.68949	6.0059	-1.18023	8.84321	6.37572	-1.87042	8.8365	6.37767	-1.97517	8.59441	6.42272	-1.99846	9.10291	6.32889	-2.0167
1950	2.274							8.60231	6.19248	-1.12879	8.67415	6.00378	-1.15651	8.84789	6.37219	-1.849	8.83391	6.37856	-1.95683	8.59158	6.43263	-1.97938	9.12	6.34185	-1.99926
1951	2.276							8.60279	6.19487	-1.11163	8.67604	6.00624	-1.13962	8.83365	6.36566	-1.82935	8.83095	6.38077	-1.93929	8.59419	6.44737	-1.95976	9.1044	6.32787	-1.97926
1952	2.278							8.59793	6.19569	-1.09578	8.67024	6.00736	-1.11463	8.83431	6.3663	-1.82252	8.83231	6.38252	-1.92251	8.59449	6.45842	-1.93895	9.09088	6.33114	-1.95706
1953	2.28							8.60079	6.19841	-1.08041	8.67091	6.00904	-1.09502	8.81558	6.35711	-1.80568	8.82237	6.37783	-1.90671	8.58963	6.46254	-1.91973	9.10305	6.34651	-1.94039
1954	2.282							8.60067	6.20162	-1.05983	8.67354	6.01219	-1.07586	8.81414	6.35517	-1.79475	8.81355	6.36936	-1.88447	8.58714	6.47063	-1.89973	9.10705	6.34897	-1.92337
1955	2.284							8.59933	6.20401	-1.04187	8.6759	6.01528	-1.05419	8.79935	6.33645	-1.78378	8.81724	6.3775	-1.86942	8.58721	6.48087	-1.88735	9.09014	6.34594	-1.90312
1956	2.286							8.60069	6.2075	-1.02442	8.67716	6.01711	-1.03968	8.79214	6.3306	-1.76751	8.80878	6.37097	-1.85531	8.58625	6.48881	-1.86167	9.08423	6.35095	-1.88705
1957	2.288							8.60111	6.21132	-1.00518	8.67196	6.01839	-1.01993	8.77631	6.31067	-1.75338	8.79899	6.35767	-1.83583	8.58639	6.49513	-1.84692	9.07114	6.34883	-1.86963
1958	2.29							8.60056	6.21433	-0.987711	8.66492	6.01822	-0.999781	8.78036	6.3078	-1.74059	8.79315	6.34996	-1.82226	8.58548	6.49505	-1.83037	9.06818	6.35958	-1.85533
1959	2.292							8.6002	6.21702	-0.966021	8.65815	6.01811	-0.982193	8.76503	6.29683	-1.72919	8.78674	6.34502	-1.80673	8.59051	6.50277	-1.81602	9.0741	6.36829	-1.83799
1960	2.294							8.60105	6.22012	-0.951578	8.66033	6.02118	-0.958129	8.76591	6.28795	-1.71327	8.78453	6.33977	-1.79373	8.57816	6.49345	-1.79519	NaN	NaN	NaN
1961	2.296							8.60158	6.22463	-0.932075	8.66746	6.03021	-0.936943	8.75433	6.27592	-1.69921	8.77852	6.33053	-1.77878	8.58464	6.48745	-1.77811	NaN	NaN	NaN
1962	2.298							8.60424	6.2294	-0.913265	8.66827	6.03191	-0.917492	8.75209	6.26498	-1.68684	8.77307	6.32174	-1.76603	8.59063	6.48838	-1.76254	NaN	NaN	NaN
1963	2.3							8.60453	6.2328	-0.894045	8.66764	6.03907	-0.89575	8.74601	6.26081	-1.66993	8.76534	6.31153	-1.7524	8.59719	6.48152	-1.73945	NaN	NaN	NaN
1964	2.302							8.60354	6.23541	-0.878265	8.665	6.03575	-0.878753	8.73347	6.23958	-1.6565	8.75518	6.29714	-1.73706	8.58732	6.4685	-1.72243	NaN	NaN	NaN
1965	2.304							8.60366	6.23867	-0.85723	8.66318	6.04205	-0.854337	8.72161	6.22523	-1.6379	8.75151	6.28912	-1.7234	8.58787	6.46906	-1.70449	NaN	NaN	NaN
1966	2.306							8.60079	6.24224	-0.840564	8.67019	6.0506	-0.840457	8.726	6.22273	-1.62409	8.74229	6.27695	-1.70865	8.58349	6.46227	-1.69024	NaN	NaN	NaN
1967	2.308							8.60582	6.24792	-0.822195	8.66638	6.04641	-0.820821	8.71751	6.20414	-1.60906	8.73691	6.2668	-1.69346	8.57399	6.44782	-1.67362	NaN	NaN	NaN
1968	2.31							8.60697	6.25199	-0.805124	8.6783	6.0614	-0.799896	8.70707	6.19422	-1.58972	8.72861	6.25366	-1.67763	8.57276	6.44261	-1.65505	NaN	NaN	NaN
1969	2.312							8.60824	6.25738	-0.786426	8.6726	6.06209	-0.782785	8.7154	6.1889	-1.57587	8.72437	6.24524	-1.66279	8.56401	6.42993	-1.63751	NaN	NaN	NaN
1970	2.314							8.61059	6.26361	-0.765598	8.67182	6.0692	-0.758656	8.7042	6.17803	-1.55227	8.71844	6.2354	-1.64701	8.55477	6.41556	-1.62284	NaN	NaN	NaN
1971	2.316							8.61316	6.26873	-0.75159	8.67323	6.07109	-0.744331	8.70273	6.16832	-1.54431	8.71211	6.22327	-1.63076	8.55724	6.41384	-1.60656	NaN	NaN	NaN
1972	2.318							8.61361	6.27337	-0.734273	8.6798	6.07951	-0.725434	8.68532	6.14955	-1.52194	8.70226	6.20961	-1.61406	8.54251	6.393	-1.59055	NaN	NaN	NaN
1973	2.32							8.61598	6.27944	-0.71178	8.67294	6.07927	-0.705724	8.68787	6.1428	-1.5055	8.69925	6.20078	-1.59876	8.53469	6.37932	-1.57521	NaN	NaN	NaN
1974	2.322							8.61363	6.28139	-0.697724	8.68025	6.08843	-0.684552	8.67938	6.12972	-1.48893	8.69117	6.18844	-1.58022	8.52525	6.36348	-1.56301	NaN	NaN	NaN
1975	2.324							8.61728	6.288	-0.6797	8.67414	6.08892	-0.662629	8.67887	6.12406	-1.4694	8.68561	6.17622	-1.56369	8.52457	6.36067	-1.54887	NaN	NaN	NaN
1976	2.326							8.61135	6.28852	-0.662891	8.66782	6.08889	-0.647988	8.67129	6.11284	-1.44589	8.68005	6.16477	-1.54761	8.51623	6.34698	-1.53282	NaN	NaN	NaN
1977	2.328							8.61669	6.29462	-0.647471	8.66977	6.09143	-0.628988	8.6672	6.10201	-1.43578	8.67525	6.15475	-1.53009	8.50562	6.32913	-1.51536	NaN	NaN	NaN
1978	2.33							8.61949	6.29985	-0.628872	8.67664	6.09998	-0.612589	8.66223	6.09078	-1.41218	8.66952	6.14294	-1.51171	8.50387	6.32369	-1.49952	NaN	NaN	NaN
1979	2.332							8.62154	6.30797	-0.610003	8.67475	6.10572	-0.595636	8.65754	6.07991	-1.38662	8.66468	6.13305	-1.49474	8.49485	6.30758	-1.48185	NaN	NaN	NaN
1980	2.334							8.63019	6.31981	-0.590819	8.66896	6.10633	-0.576342	8.65419	6.07048	-1.36449	8.66119	6.12362	-1.47787	8.45732	6.28383	-1.46149	NaN	NaN	NaN
1981	2.336							8.62941	6.32311	-0.575732	8.6834	6.11673	-0.557776	8.64545	6.06277	-1.34384	8.65522	6.11326	-1.45781	8.47264	6.28588	-1.44265	NaN	NaN	NaN
1982	2.338							8.62912	6.32657	-0.560725	8.68177	6.1226	-0.543321	8.64599	6.05352	-1.32539	8.65282	6.10495	-1.43906	8.4617	6.26918	-1.42778	NaN	NaN	NaN
1983	2.34							8.63407	6.33512	-0.540997	8.676	6.1232	-0.524091	8.63082	6.03779	-1.30729	8.65039	6.09612	-1.42027	8.45559	6.26039	-1.41095	NaN	NaN	NaN
1984	2.342							8.63115	6.33758	-0.526204	8.68218	6.13103	-0.509939	8.62271	6.03302	-1.27745	8.64257	6.08321	-1.40113	8.46051	6.24743	-1.39665	NaN	NaN	NaN
1985	2.344							8.63485	6.34289	-0.513211	8.68625	6.14409	-0.486075	8.63203	6.03236	-1.25587	8.64057	6.07499	-1.37952	8.45985	6.23992	-1.38126	8.91048	6.06966	-1.43004
1986	2.346							8.64079	6.35522	-0.489169	8.68704	6.14523	-0.474152	8.63755	6.03103	-1.24052	8.63748	6.06532	-1.35794	8.45315	6.22784	-1.36258	8.90025	6.05639	-1.40868
1987	2.348							8.6385	6.35567	-0.475033	8.68281	6.14741	-0.450493	8.6284	6.0175	-1.21864	8.6344	6.05787	-1.33924	8.44914	6.21665	-1.34384	8.89256	6.04768	-1.38637
1988	2.35							8.64008	6.36264	-0.458355	8.68123	6.15327	-0.436099	8.62793	6.02034	-1.19769	8.63271	6.05002	-1.31939	8.4436	6.20533	-1.32395	8.89693	6.04073	-1.36977
1989	2.352							8.64269	6.36811	-0.442662	8.6896	6.15625	-0.421967	8.62572	6.00757	-1.17457	8.62865	6.04134	-1.30182	8.43765	6.19246	-1.30744	8.90115	6.03457	-1.35292
1990	2.354							8.64584	6.37464	-0.427316				8.62527	6.01019	-1.14724	8.62438	6.03204	-1.27506	8.43701	6.18716	-1.28632	8.87853	6.00243	-1.32855
1991	2.356							8.64665	6.38006	-0.411324				8.61518	6.00059	-1.12241	8.62064	6.0224	-1.24929	8.43702	6.18319	-1.26668	8.88037	5.99711	-1.30169
1992	2.358							8.65197	6.38795	-0.396264				8.61878	5.99732	-1.0968	8.62234	6.02109	-1.23533	8.43311	6.17349	-1.24547	8.8735	5.98778	-1.28195
1993	2.36													8.61149	5.99151	-1.07395	8.62149	6.01456	-1.21456	8.43034	6.16646	-1.22801	8.8762	5.99365	-1.26152
1994	2.362													8.61465	5.99072	-1.05313	8.61965	6.00882	-1.19184	8.43078	6.16239	-1.20797	8.86994	5.98079	-1.2386
1995	2.364													8.60872	5.98366	-1.02696	8.61271	6.00257	-1.16872	8.4341	6.15518	-1.18869	8.87581	5.97854	-1.22077
1996	2.366													8.60546	5.9824	-1.00877	8.61244	5.99786	-1.1459	8.43495	6.1498	-1.17361	8.87345	5.97451	-1.1955
1997	2.368													8.60679	5.98472	-0.986264	8.61128	5.99394	-1.12395	8.43213	6.14512	-1.15069	8.8621	5.96169	-1.16769
1998	2.37													8.60497	5.98264	-0.968244	8.60862	5.98982	-1.10133	8.42383	6.13411	-1.13139	8.87073	5.96029	-1.15066
1999	2.372													8.60394	5.98188	-0.937636	8.60862	5.98497	-1.07956	8.42238	6.12616	-1.11318	8.86258	5.94413	-1.13321
[truncated: 1,102 more rows]
